# Supplementary material for: Titanium tetrachloride-mediated synthesis of N-aryl-substituted azacycles from cyclic ethers
Source: Royal Society of Chemistry journal article supplement (doi:10.1039/c6ra27325d), 2017-01-01
Supplement: c6ra27325d1.pdf [file c6ra27325d1.pdf]

## *Supporting Information*

### Titanium tetrachloride-mediated synthesis of N-aryl-substituted azacycles from cyclic ethers

Zunming Sun, Shanshan Hu, Yan Huo, and Zhihong Wang\*

State Key Laboratory and Institute of Elemento-Organic Chemistry, Nankai University, Tianjin 300071, P. R. China

#### Experimental Section

**General Considerations.** Starting materials including cyclic ethers,  $\text{TiCl}_4$  and solvents were dried and distilled prior to use according to standard procedures, amines were used as purchased without further purification. Either pure  $\text{TiCl}_4$  liquid or its solution in dichloromethane would efficiently facilitate the reaction. All reactions were performed under an atmosphere of argon using standard Schlenk techniques. NMR spectra were recorded on a Bruker 400 spectrometer using  $\text{CDCl}_3$  as solvent, and the chemical shifts were reported in ppm with respect to the reference (internal  $\text{SiMe}_4$  for  $^1\text{H}$  NMR spectra). The products are known compounds and were identified by comparison with the reported NMR spectra of the compounds in literature.

**General procedure and preliminary reaction condition screening:** A solution of 1.2 mmol of  $\text{TiCl}_4$  and 1 mmol of aniline in 4 mL of dry solvent was stirred at room temperature for 30 minutes. To the mixture was added 10 mmol of THF and the temperature was slowly elevated. After refluxing or stirring at certain temperature for 24 h, 10 mL of saturated  $\text{NaHCO}_3$  solution and 10 mL of dichloromethane were added and stirred for 1h. The mixture was extracted with 3 x 10 mL of dichloromethane and dried over  $\text{Na}_2\text{SO}_4$ . The solvent was removed under reduced pressure, and the residue was isolated by column chromatography on silica. Results are listed below.

| Solvent      | Reaction temperature (°C) | Isolated yield (%) |
|--------------|---------------------------|--------------------|
| THF          | refluxing                 | NR                 |
| cyclohexane  | refluxing                 | NR                 |
| acetonitrile | refluxing                 | NR                 |
| benzene      | refluxing                 | < 5%               |
| dioxane      | refluxing                 | NR                 |

|         |           |                     |
|---------|-----------|---------------------|
| toluene | refluxing | 68%                 |
| toluene | 80        | < 5%                |
| octane  | refluxing | NR                  |
| DMF     | refluxing | Complicated mixture |

Thus further screening of Lewis acid was carried out by refluxing the reaction mixture in toluene.

**Synthesis of N-phenylpyrrolidine (3a):** A solution of 0.13 mL (1.2 mmol) of  $\text{TiCl}_4$  and 0.10 mL (1 mmol) of aniline in 4 mL of dry toluene was stirred at room temperature for 30 minutes. To the mixture was added 1.0 mL (10 mmol) of THF and the temperature was slowly elevated to 110 °C. After refluxing for 24 h, 10 mL of saturated  $\text{NaHCO}_3$  solution and 10 mL of dichloromethane were added and stirred for 1h. The mixture was extracted with 3 x 10 mL of dichloromethane and dried over  $\text{Na}_2\text{SO}_4$ . The solvent was removed under reduced pressure, and the residue was isolated by column chromatography on silica using  $\text{CH}_2\text{Cl}_2$ /hexanes (1:4 v/v) as eluent to give yellow liquid (100 mg, yield 68%).  $^1\text{H}$  NMR: (400MHz,  $\text{CDCl}_3$ )  $\delta$  = 7.28-7.16 (m, 2H), 6.66 (t,  $J$  = 7.9 Hz, 1H), 6.57 (d,  $J$  = 7.9 Hz, 2H), 3.28 (t,  $J$  = 6.5 Hz, 4H), 2.04-1.93 (m, 4H) ppm.  $^{13}\text{C}$  NMR (101 MHz,  $\text{CDCl}_3$ )  $\delta$  148.1, 129.2, 115.4, 111.7, 47.6, 25.5 ppm.

**Synthesis of N-(4-fluorophenyl)pyrrolidine (3b):** The reaction was carried out as above-mentioned procedure for N-phenylpyrrolidine, using 4-fluoroaniline instead of aniline. Isolation by column chromatography on silica using  $\text{CH}_2\text{Cl}_2$ /hexanes (1:4 v/v) as eluent gave brown liquid (137 mg, yield 83%).  $^1\text{H}$  NMR: (400MHz,  $\text{CDCl}_3$ )  $\delta$  = 6.99-6.90 (m, 2H), 6.52-6.45 (m, 2H), 3.25 (t,  $J$  = 6.6 Hz, 4H), 2.04-1.99 (m, 4H) ppm.  $^{13}\text{C}$  NMR (101 MHz,  $\text{CDCl}_3$ )  $\delta$  154.8(d,  $^1J_{\text{CF}}$  = 232.9 Hz), 144.8, 115.5 (d,  $^2J_{\text{CF}}$  = 22.2 Hz), 112.1 (d,  $^3J_{\text{CF}}$  = 7.4 Hz), 48.1, 25.5 ppm.

**Synthesis of N-(4-chlorophenyl)pyrrolidine (3c):** The reaction was carried out as above-mentioned procedure for N-phenylpyrrolidine, using 4-chloroaniline instead of aniline. Isolation by column chromatography on silica using  $\text{CH}_2\text{Cl}_2$ /hexanes (1:4 v/v) as eluent gave white solid (130 mg, yield 72%).  $^1\text{H}$  NMR: (400MHz,  $\text{CDCl}_3$ )  $\delta$  = 7.14 (d,  $J$  = 8.6 Hz, 1H), 6.45 (d,  $J$  = 8.6 Hz, 1H), 3.24 (t,  $J$  = 6.0 Hz, 2H), 2.00 (t,  $J$  = 6.0 Hz, 2H) ppm.  $^{13}\text{C}$  NMR (101 MHz,  $\text{CDCl}_3$ )  $\delta$  146.5, 128.9, 120.1, 112.6, 47.7, 25.5 ppm.

**Synthesis of N-(3-chlorophenyl)pyrrolidine (3d):** The reaction was carried out as above-mentioned procedure for N-phenylpyrrolidine, using 3-chloroaniline instead of aniline. Isolation by column chromatography on silica using  $\text{CH}_2\text{Cl}_2$ /hexanes (1:4 v/v) as eluent gave yellow liquid (137 mg, yield 76%).  $^1\text{H}$  NMR: (400MHz,  $\text{CDCl}_3$ )  $\delta$  = 7.12 (t,  $J$  = 7.9 Hz, 1H), 6.62 (d,  $J$  = 7.9 Hz, 1H), 6.53 (s, 1H), 6.43 (d,  $J$  = 8.3 Hz,

1H), 3.27 (t,  $J = 5.9$  Hz, 5H), 2.02 (d,  $J = 5.9$  Hz, 4H) ppm.  $^{13}\text{C}$  NMR (101 MHz,  $\text{CDCl}_3$ )  $\delta$  148.9, 134.9, 130.0, 115.1, 111.4, 109.9, 47.6, 25.5 ppm.

**Synthesis of N-(2-chlorophenyl)pyrrolidine (3e):** The reaction was carried out as above-mentioned procedure for N-phenylpyrrolidine, using 2-chloroaniline instead of aniline. Isolation by column chromatography on silica using  $\text{CH}_2\text{Cl}_2$ /hexanes (1:4 v/v) as eluent gave yellow liquid (103 mg, yield 57%).  $^1\text{H}$  NMR: (400MHz,  $\text{CDCl}_3$ )  $\delta = 7.31$  (d,  $J = 7.8$  Hz, 1H), 7.15 (t,  $J = 7.8$  Hz, 1H), 6.90 (d,  $J = 7.8$  Hz, 1H), 6.79 (t,  $J = 7.8$  Hz, 1H), 3.39 (t,  $J = 5.8$  Hz, 4H), 1.97 (d,  $J = 5.8$  Hz, 4H) ppm.  $^{13}\text{C}$  NMR (101 MHz,  $\text{CDCl}_3$ )  $\delta$  147.2, 131.3, 127.2, 123.4, 120.2, 117.1, 50.9, 25.2 ppm.

**Synthesis of N-(2,6-dichlorophenyl)pyrrolidine (3f):** The reaction was carried out as above-mentioned procedure for N-phenylpyrrolidine, using 2,6-dichloroaniline instead of aniline. Isolation by column chromatography on silica using  $\text{CH}_2\text{Cl}_2$ /hexanes (1:4 v/v) as eluent gave yellow liquid (108 mg, yield 50%).  $^1\text{H}$  NMR: (400MHz,  $\text{CDCl}_3$ )  $\delta = 7.53$ -7.50 (m, 2H), 7.24-7.20 (m, 1H), 3.55-3.51 (m, 4H), 2.24-2.18 (m, 4H) ppm.  $^{13}\text{C}$  NMR (101 MHz,  $\text{CDCl}_3$ )  $\delta$  143.4, 136.6, 128.9, 126.0, 49.9, 26.5 ppm.

**Synthesis of N-(3-nitrophenyl)pyrrolidine (3g):** The reaction was carried out as above-mentioned procedure for N-phenylpyrrolidine, using 3-nitroaniline instead of aniline. Isolation by column chromatography on silica using  $\text{CH}_2\text{Cl}_2$ /hexanes (1:4 v/v) as eluent gave yellow liquid (113 mg, yield 59%).  $^1\text{H}$  NMR: (400MHz,  $\text{CDCl}_3$ )  $\delta = 7.46$  (d,  $J = 8.1$  Hz, 1H), 7.33 (s, 1H), 7.31 (t,  $J = 8.1$  Hz, 1H), 6.80 (d,  $J = 8.1$  Hz, 1H), 3.34 (t,  $J = 5.7$  Hz, 4H), 2.07 (t,  $J = 5.7$  Hz, 4H) ppm.  $^{13}\text{C}$  NMR (101 MHz,  $\text{CDCl}_3$ )  $\delta$  149.3, 148.2, 129.5, 117.2, 109.8, 105.6, 47.8, 25.5 ppm.

**Synthesis of N-(4-methylphenyl)pyrrolidine (3h):** The reaction was carried out as above-mentioned procedure for N-phenylpyrrolidine, using 4-methylaniline instead of aniline. Isolation by column chromatography on silica using  $\text{CH}_2\text{Cl}_2$ /hexanes (1:4 v/v) as eluent gave light yellow liquid (97 mg, yield 60%).  $^1\text{H}$  NMR: (400MHz,  $\text{CDCl}_3$ )  $\delta = 7.10$  (d,  $J = 7.7$  Hz, 2H), 6.56 (d,  $J = 7.7$  Hz, 2H), 3.32 (d,  $J = 5.1$  Hz, 3H), 2.32 (s, 3H), 2.05 (d,  $J = 5.1$  Hz, 3H) ppm.  $^{13}\text{C}$  NMR (101 MHz,  $\text{CDCl}_3$ )  $\delta$  146.2, 129.7, 124.5, 111.8, 47.9, 25.5, 20.3 ppm.

**Synthesis of N-phenyl-2-methylpyrrolidine (3i):** The reaction was carried out as above-mentioned procedure for N-phenylpyrrolidine, using 2-methyl tetrahydrofuran instead of tetrahydrofuran. Isolation by column chromatography on silica using  $\text{CH}_2\text{Cl}_2$ /hexanes (1:4 v/v) as eluent gave light yellow liquid (107 mg, yield 67%).  $^1\text{H}$  NMR: (400MHz,  $\text{CDCl}_3$ )  $\delta = 7.24$ -7.17 (m, 2H), 6.63 (td,  $J = 7.3, 0.9$  Hz, 1H), 6.60-6.55 (m, 2H), 3.87 (p,  $J = 6.2$  Hz, 1H), 3.47-3.37 (m, 1H), 3.16 (dt,  $J = 16.2, 8.0$  Hz, 1H), 2.15-1.89 (m, 3H), 1.69 (td,  $J = 6.4, 2.5$  Hz, 1H), 1.17 (d,  $J = 6.4$  Hz, 3H) ppm.  $^{13}\text{C}$  NMR (101 MHz,  $\text{CDCl}_3$ )  $\delta$  147.2, 129.2, 115.1, 111.8, 53.6, 48.2, 33.1, 23.3, 19.4 ppm.

**Synthesis of N-(4-chlorophenyl)-2-methylpyrrolidine (3j):** The reaction was carried out as above-mentioned procedure for N-phenyl-2-methylpyrrolidine, using 4-chloroaniline instead of aniline. Isolation by column chromatography on silica using CH<sub>2</sub>Cl<sub>2</sub>/hexanes (1:4 v/v) as eluent gave yellow liquid (117 mg, yield 60%). <sup>1</sup>H NMR: (400MHz, CDCl<sub>3</sub>) δ = 7.14 (d, *J* = 7.5 Hz, 2H), 6.48 (d, *J* = 7.5 Hz, 2H), 3.83 (p, *J* = 6.2 Hz, 1H), 3.38 (t, *J* = 8.1 Hz, 1H), 3.12 (dd, *J* = 16.2, 7.8 Hz, 1H), 2.14-2.02 (m, 2H), 2.02-1.92 (m, 1H), 1.79-1.63 (m, 1H), 1.15 (d, *J* = 6.0 Hz, 3H) ppm. <sup>13</sup>C NMR (101 MHz, CDCl<sub>3</sub>) δ 145.8, 128.9, 119.9, 112.8, 53.8, 48.3, 33.1, 23.3, 19.1 ppm.

**Synthesis of N-(3-chlorophenyl)-2-methylpyrrolidine (3k):** The reaction was carried out as above-mentioned procedure for N-phenyl-2-methylpyrrolidine, using 3-chloroaniline instead of aniline. Isolation by column chromatography on silica using CH<sub>2</sub>Cl<sub>2</sub>/hexanes (1:4 v/v) as eluent gave light yellow liquid (148 mg, yield 76%). <sup>1</sup>H NMR: (400MHz, CDCl<sub>3</sub>) δ = 7.11 (t, *J* = 8.3 Hz, 2H), 6.62-6.58 (m, 1H), 6.54 (t, *J* = 2.1 Hz, 1H), 6.44 (dd, *J* = 8.3, 2.1 Hz, 1H), 3.91-3.79 (m, 1H), 3.39 (ddd, *J* = 9.6, 6.3, 2.1 Hz, 1H), 3.19-3.10 (m, 1H), 2.18-1.90 (m, 3H), 1.71 (ddd, *J* = 6.3, 4.7, 2.1 Hz, 1H), 1.17 (d, *J* = 6.3 Hz, 3H) ppm. <sup>13</sup>C NMR (101 MHz, CDCl<sub>3</sub>) δ 148.1, 135.0, 130.0, 114.9, 111.5, 110.0, 53.7, 48.1, 33.0, 23.2, 19.1 ppm.

**Synthesis of N-phenylpiperidine (3l):** The reaction was carried out as above-mentioned procedure for N-phenylpyrrolidine, using tetrahydropyran instead of tetrahydrofuran. After refluxing in xylenes for 24 h, aqueous work-up and isolation by column chromatography on silica using CH<sub>2</sub>Cl<sub>2</sub>/hexanes (1:4 v/v) as eluent gave yellow liquid (101 mg, yield 63%). <sup>1</sup>H NMR: (400MHz, CDCl<sub>3</sub>) δ = 7.24 (t, *J* = 7.3 Hz, 2H), 6.94 (d, *J* = 8.0 Hz, 2H), 6.82 (t, *J* = 7.3 Hz, 1H), 3.18-3.10 (m, 4H), 1.71 (dd, *J* = 10.2, 5.1 Hz, 4H), 1.63 -1.48 (m, 2H) ppm. <sup>13</sup>C NMR (101 MHz, CDCl<sub>3</sub>) δ 152.3, 129.0, 119.2, 116.6, 50.7, 25.9, 24.4 ppm.

**Synthesis of N-(4-fluorophenyl)piperidine (3m):** The reaction was carried out as above-mentioned procedure for N-phenylpiperidine, using 4-fluoroaniline instead of aniline. Isolation by column chromatography on silica using CH<sub>2</sub>Cl<sub>2</sub>/hexanes (1:4 v/v) as eluent gave yellow liquid (120 mg, yield 67%). <sup>1</sup>H NMR: (400MHz, CDCl<sub>3</sub>) δ = 7.00-6.91 (m, 2H), 6.92-6.84 (m, 2H), 3.11-2.99 (m, 4H), 1.72 (dt, *J* = 11.3, 5.7 Hz, 4H), 1.64 - 1.49 (m, 2H) ppm. <sup>13</sup>C NMR (101 MHz, CDCl<sub>3</sub>) δ 157.0 (d, <sup>1</sup>*J* = 238.5 Hz), 149.1, 118.4 (d, <sup>3</sup>*J* = 7.6 Hz), 115.4(d, <sup>2</sup>*J* = 22.1 Hz), 51.8, 26.0, 24.1 ppm.

**Synthesis of N-(2,4-difluorophenyl)piperidine (3n):** The reaction was carried out as above-mentioned procedure for N-phenylpiperidine, using 2,4-difluoroaniline instead of aniline. Isolation by column chromatography on silica using CH<sub>2</sub>Cl<sub>2</sub>/hexanes (1:4 v/v) as eluent gave yellow liquid (158 mg, yield 80%). <sup>1</sup>H NMR: (400MHz, CDCl<sub>3</sub>) δ = 6.95-6.86 (m, 1H), 6.78 (tdt, *J* = 5.8, 4.0, 2.9 Hz, 2H), 3.00-2.89 (m, 4H), 1.78-1.67 (m, 4H), 1.56 (ddd, *J* = 11.5, 6.9, 4.5 Hz, 2H) ppm. <sup>13</sup>C NMR (101 MHz, CDCl<sub>3</sub>) δ 158.0 (d, <sup>1</sup>*J* = 205.3 Hz), 156.6, 119.7 (dd, *J* = 9.2, 4.3 Hz),

110.6 (dd,  $J = 21.3, 3.7$  Hz), 105.4-103.4 (m), 52.7, 26.3, 24.3 ppm.

**Synthesis of N-(3,5-dichlorophenyl)piperidine (3o):** The reaction was carried out as above-mentioned procedure for N-phenylpiperidine, using 3,5-dichloroaniline instead of aniline. Isolation by column chromatography on silica using  $\text{CH}_2\text{Cl}_2$ /hexanes (1:4 v/v) as eluent gave light yellow liquid (96 mg, yield 42%).  $^1\text{H}$  NMR: (400MHz,  $\text{CDCl}_3$ )  $\delta = 6.72$  (d,  $J = 12.2$  Hz, 3H), 3.55 (t,  $J = 6.6$  Hz, 2H), 3.21-3.12 (m, 4H), 1.71-1.63 (m, 4H) ppm.  $^{13}\text{C}$  NMR (101 MHz,  $\text{CDCl}_3$ )  $\delta$  153.2, 135.3, 117.9, 113.9, 49.6, 31.9, 25.4 ppm.

**Synthesis of N-phenylisoindoline (3p):** The reaction was carried out as above-mentioned procedure for N-phenylpyrrolidine, using phthalan instead of tetrahydrofuran. After refluxing in xylenes for 24 h, aqueous work-up and isolation by column chromatography on silica using  $\text{CH}_2\text{Cl}_2$ /hexanes (1:4 v/v) as eluent gave white solid (62 mg, yield 32%).  $^1\text{H}$  NMR: (400MHz,  $\text{CDCl}_3$ )  $\delta = 7.42$ -7.27 (m, 1H), 6.75 (t,  $J = 7.8$  Hz, 1H), 6.69 (d,  $J = 7.8$  Hz, 1H), 4.66 (s, 1H) ppm.  $^{13}\text{C}$  NMR (101 MHz,  $\text{CDCl}_3$ )  $\delta$  147.0, 137.9, 129.4, 127.2, 122.6, 116.3, 111.7, 53.9 ppm.

**Synthesis of N-(4-fluorophenyl)tetrahydroisoquinoline (3q):** The reaction was carried out as above-mentioned procedure for N-phenylpyrrolidine, using isochroman instead of tetrahydrofuran, 4-fluoroaniline instead of aniline. After refluxing in xylenes for 24 h, aqueous work-up and isolation by column chromatography on silica using  $\text{CH}_2\text{Cl}_2$ /hexanes (1:4 v/v) as eluent gave white solid (181 mg, yield 80%).  $^1\text{H}$  NMR: (400MHz,  $\text{CDCl}_3$ )  $\delta = 7.23$ -7.13 (m, 4H), 7.11-6.83 (m, 4H), 4.34 (s, 2H), 3.49 (t,  $J = 5.9$  Hz, 2H), 2.99 (t,  $J = 5.9$  Hz, 2H) ppm.  $^{13}\text{C}$  NMR (101 MHz,  $\text{CDCl}_3$ )  $\delta$  157.0 (d,  $^1J_{\text{CF}} = 235.6$  Hz), 147.3, 134.5, 134.3, 128.6, 126.7 (d,  $^3J_{\text{CF}} = 11.0$  Hz), 126.1, 117.4, 117.3, 115.8 (d,  $^2J_{\text{CF}} = 22.2$  Hz), 51.9, 47.8, 29.0 ppm.

**Synthesis of N-(2-chlorophenyl)tetrahydroisoquinoline (3r):** The reaction was carried out as above-mentioned procedure for N-(4-fluorophenyl)tetrahydroisoquinoline, using 2-chloroaniline and isochroman. Isolation by column chromatography on silica using  $\text{CH}_2\text{Cl}_2$ /hexanes (1:4 v/v) as eluent gave white solid (119 mg, yield 49%).  $^1\text{H}$  NMR: (400MHz,  $\text{CDCl}_3$ )  $\delta = 7.45$  (d,  $J = 7.7$  Hz, 1H), 7.33-7.20 (m, 4H), 7.20-7.12 (m, 2H), 7.04 (t,  $J = 7.7$  Hz, 1H), 4.33 (s, 2H), 3.45 (t,  $J = 5.8$  Hz, 2H), 3.08 (t,  $J = 5.7$  Hz, 2H) ppm.  $^{13}\text{C}$  NMR (101 MHz,  $\text{CDCl}_3$ )  $\delta$  149.2, 134.7, 134.6, 130.8, 129.0, 128.9, 127.6, 126.4, 126.4, 125.8, 123.7, 120.7, 53.3, 50.0, 29.1 ppm.

# NMR spectra of the Products

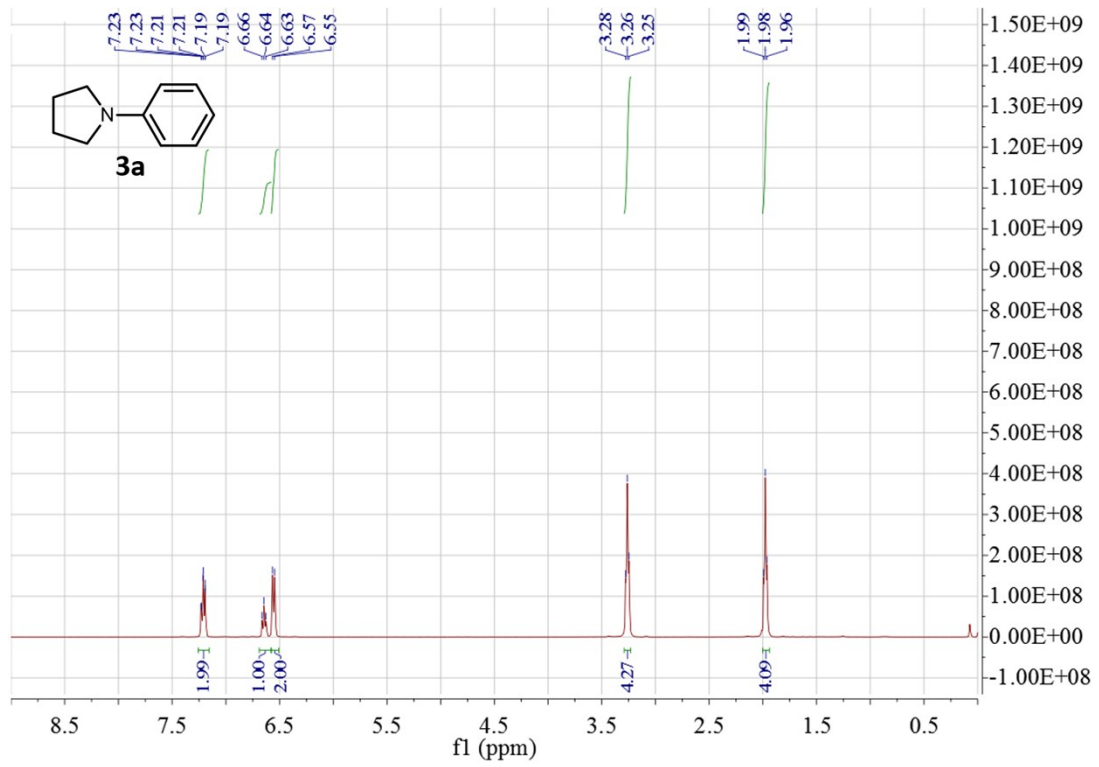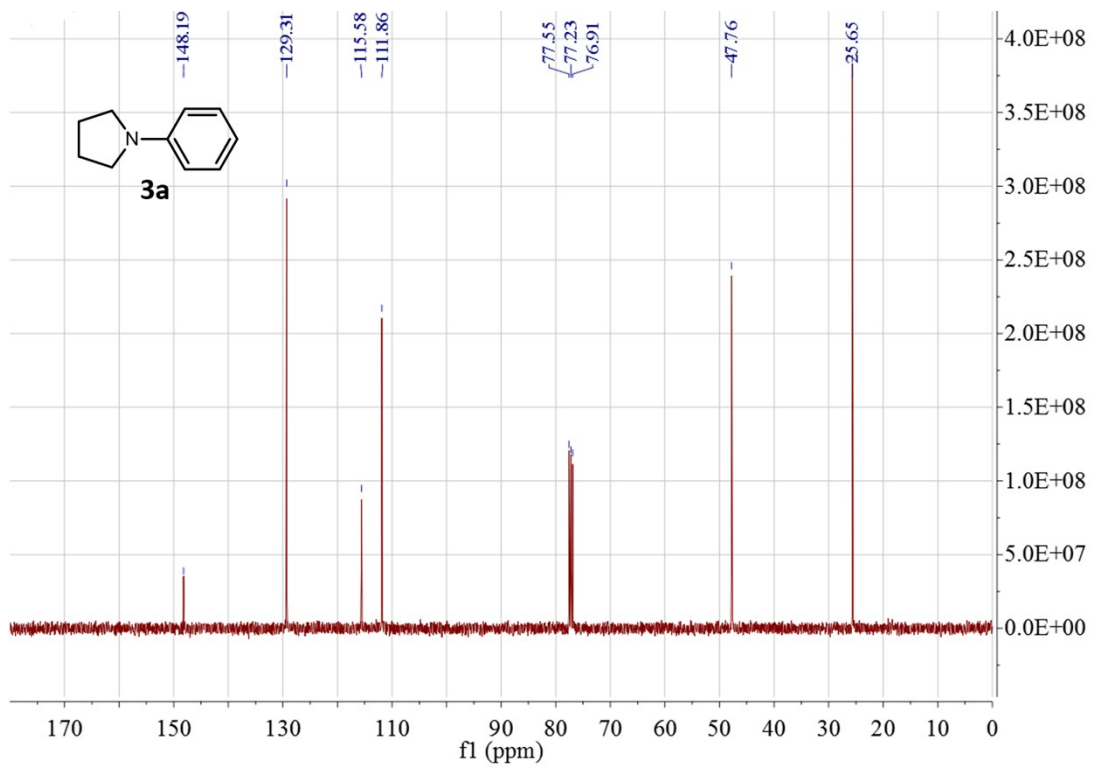

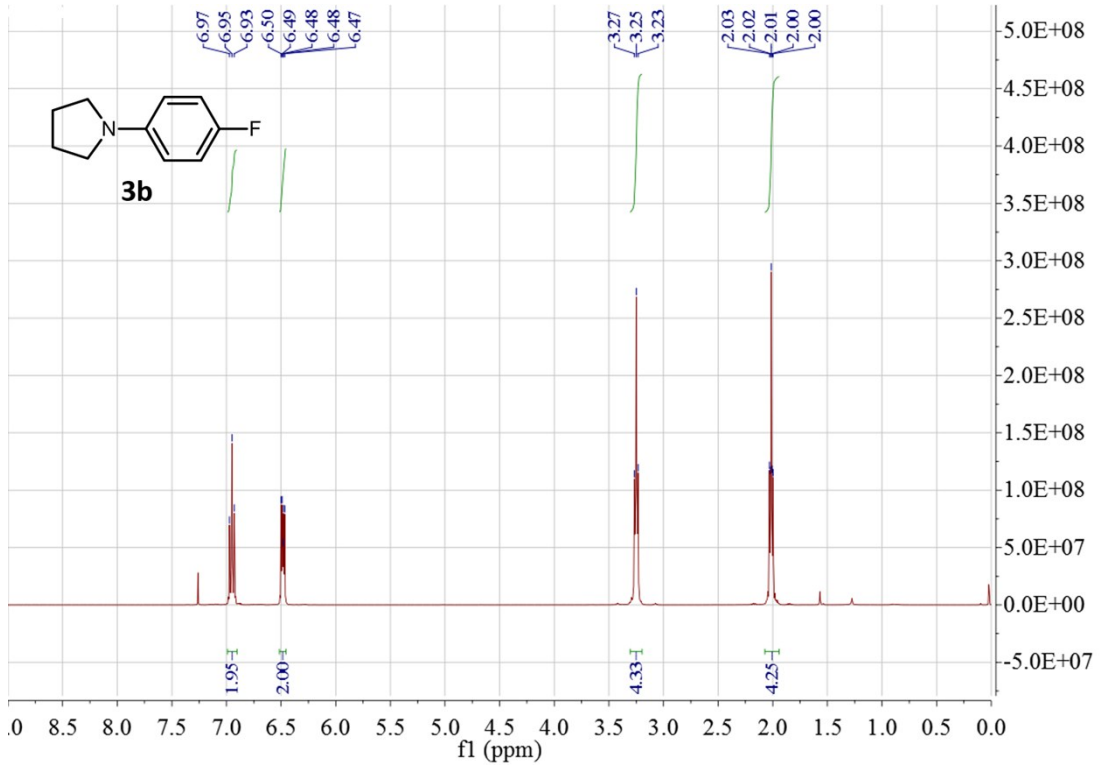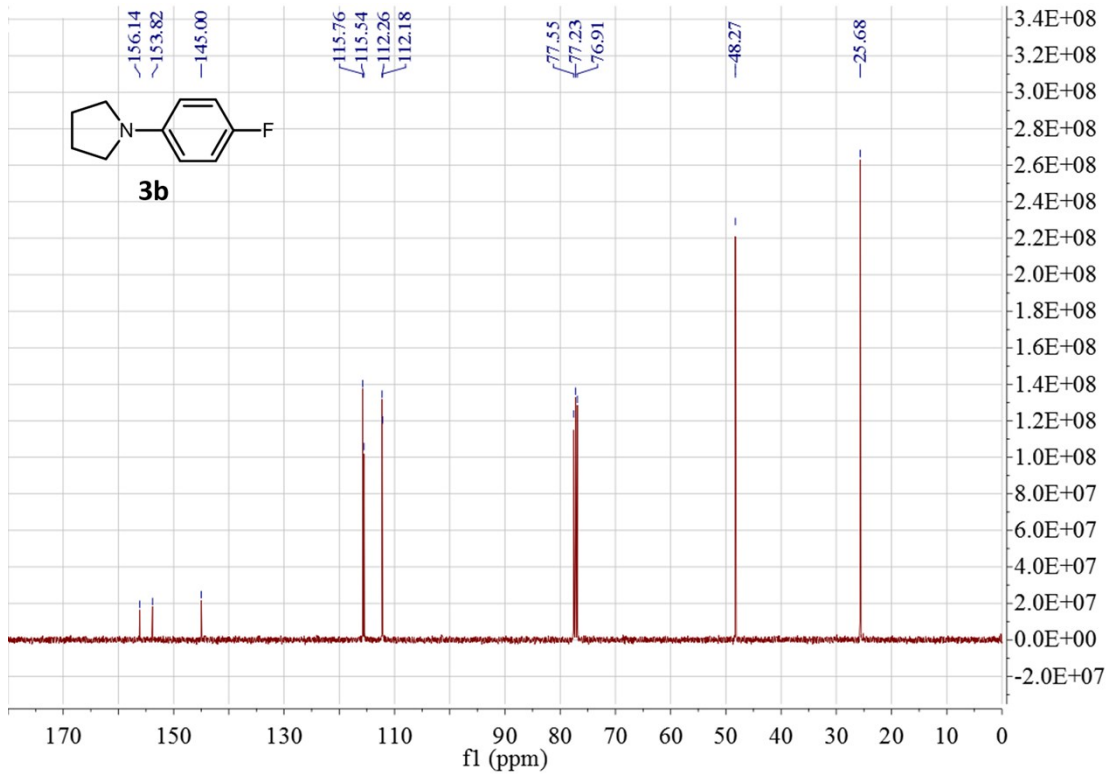

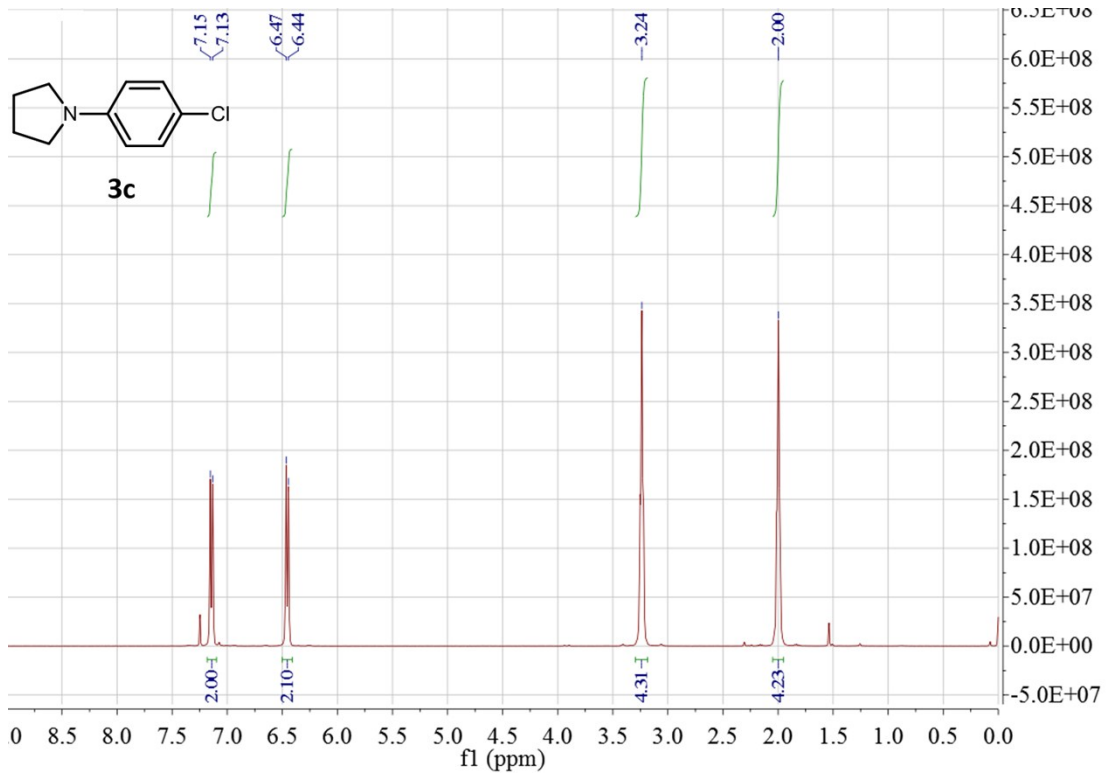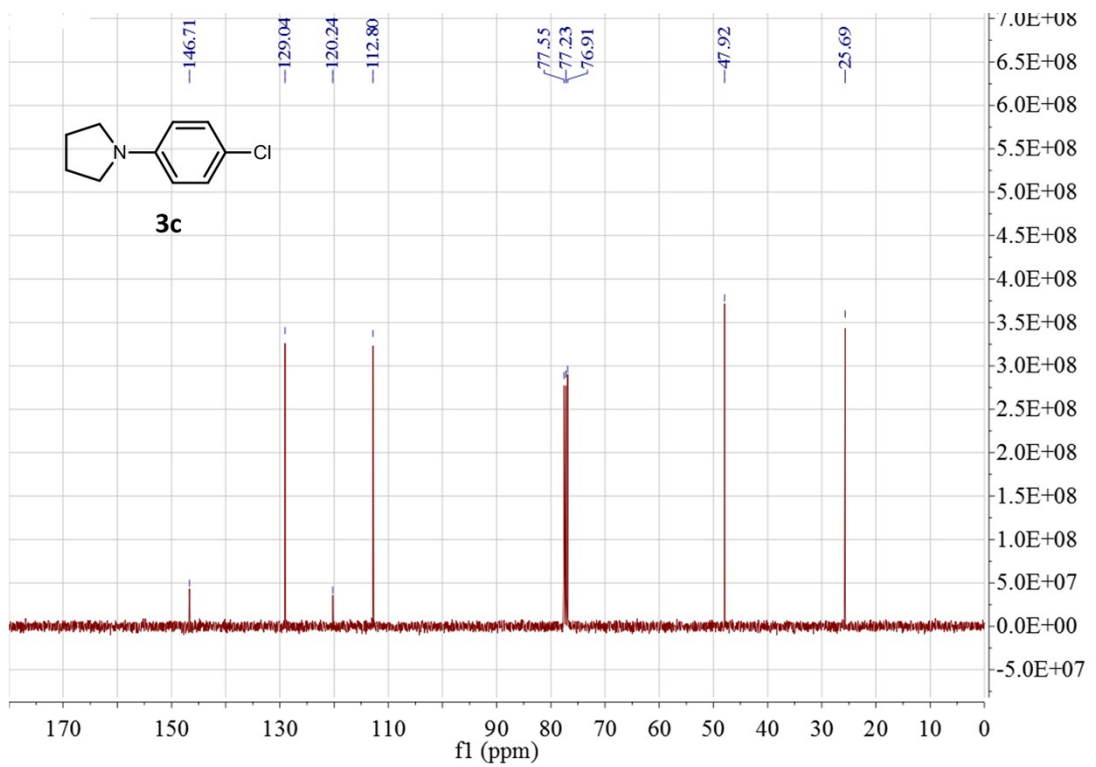



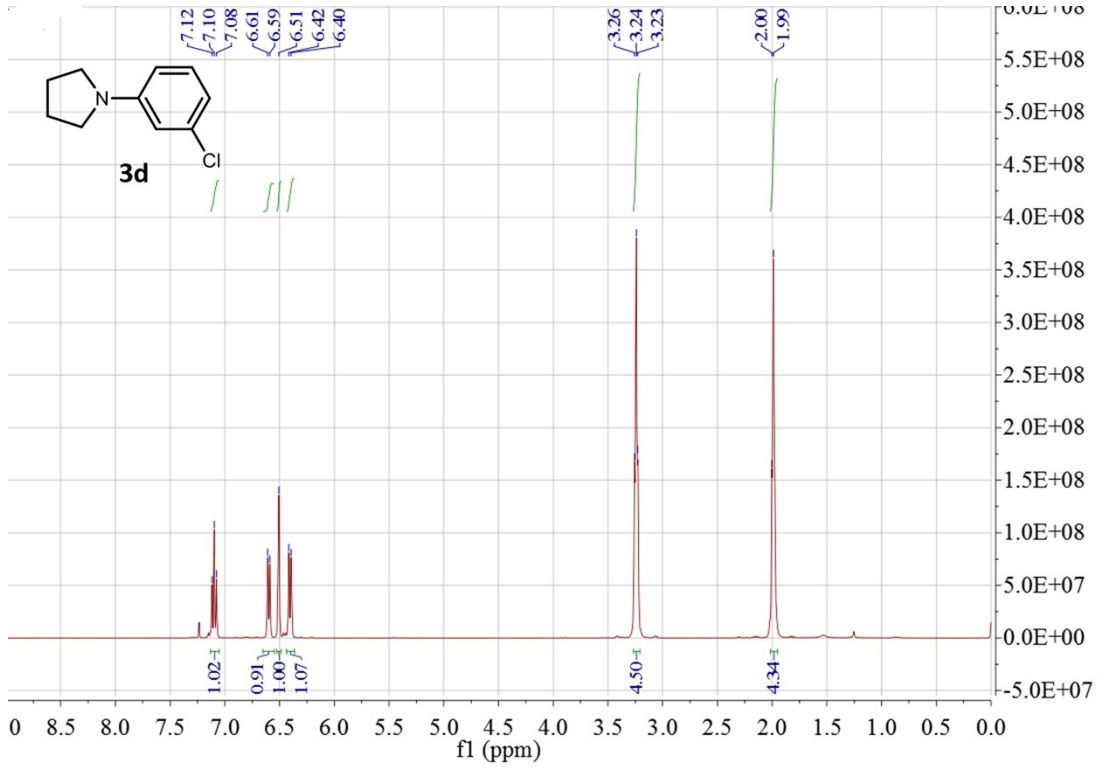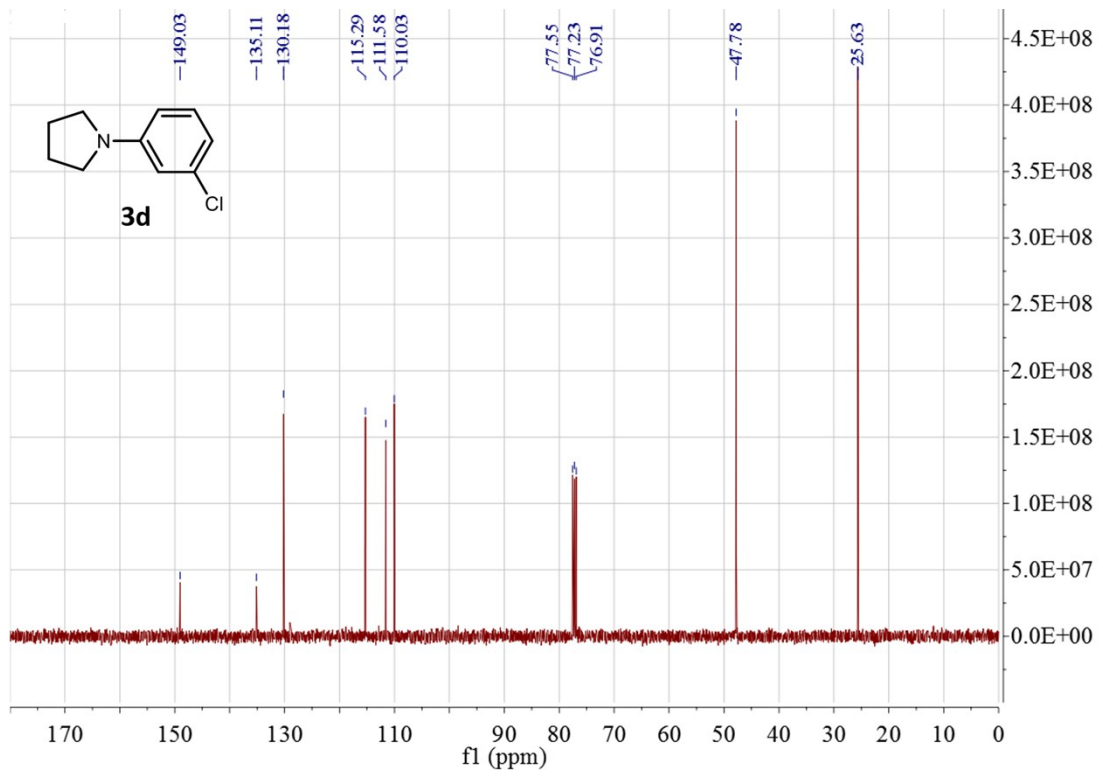

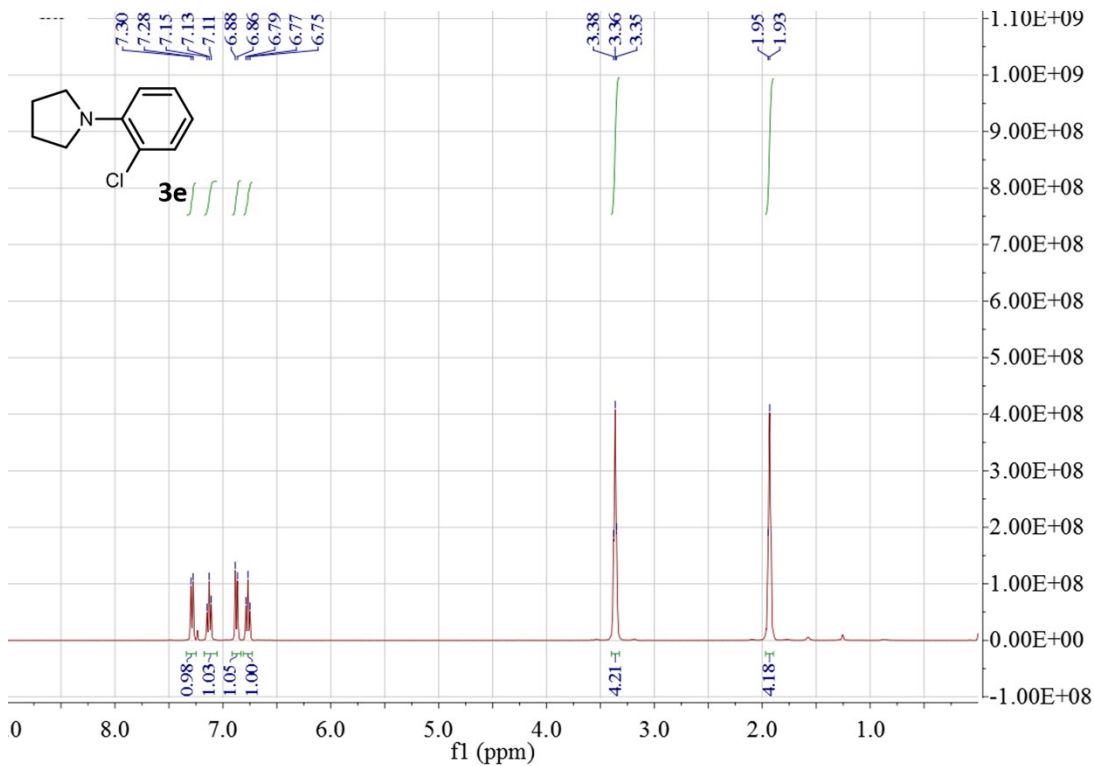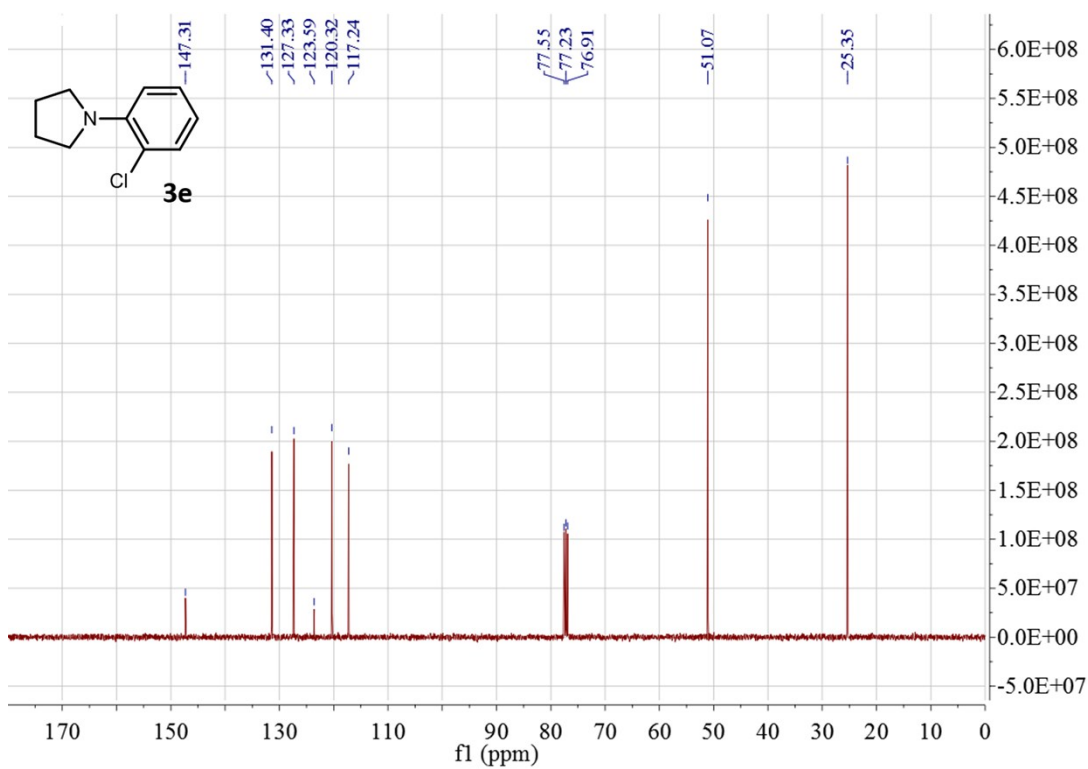

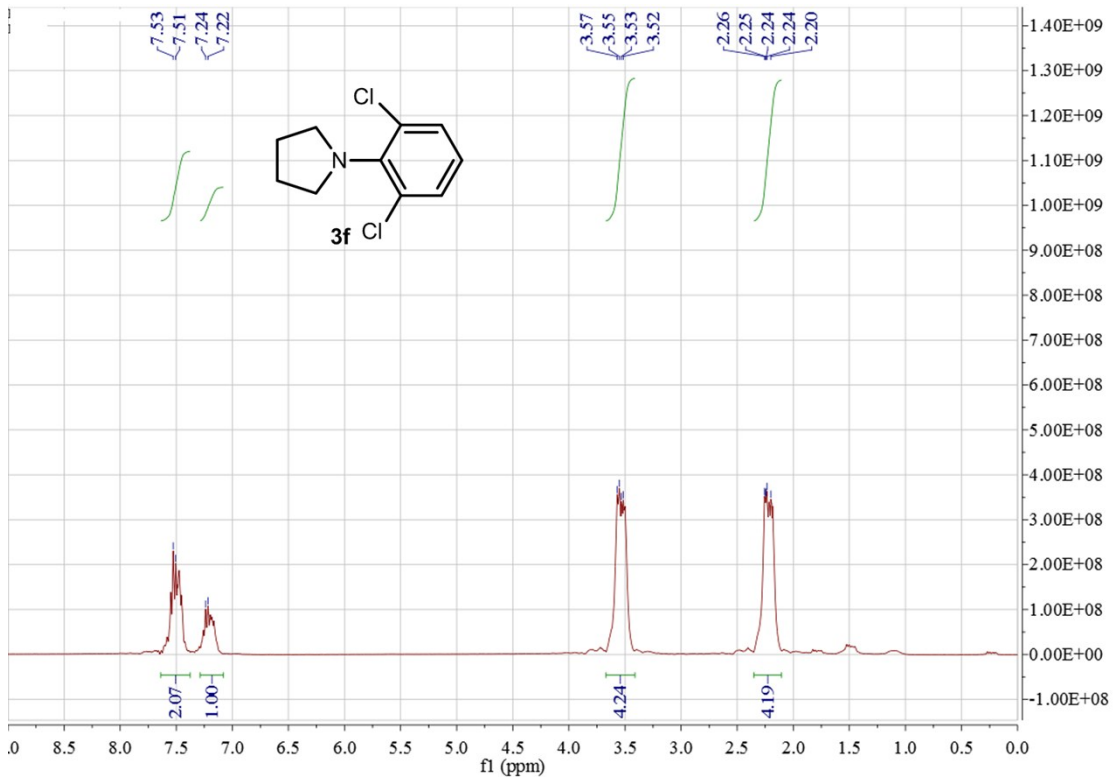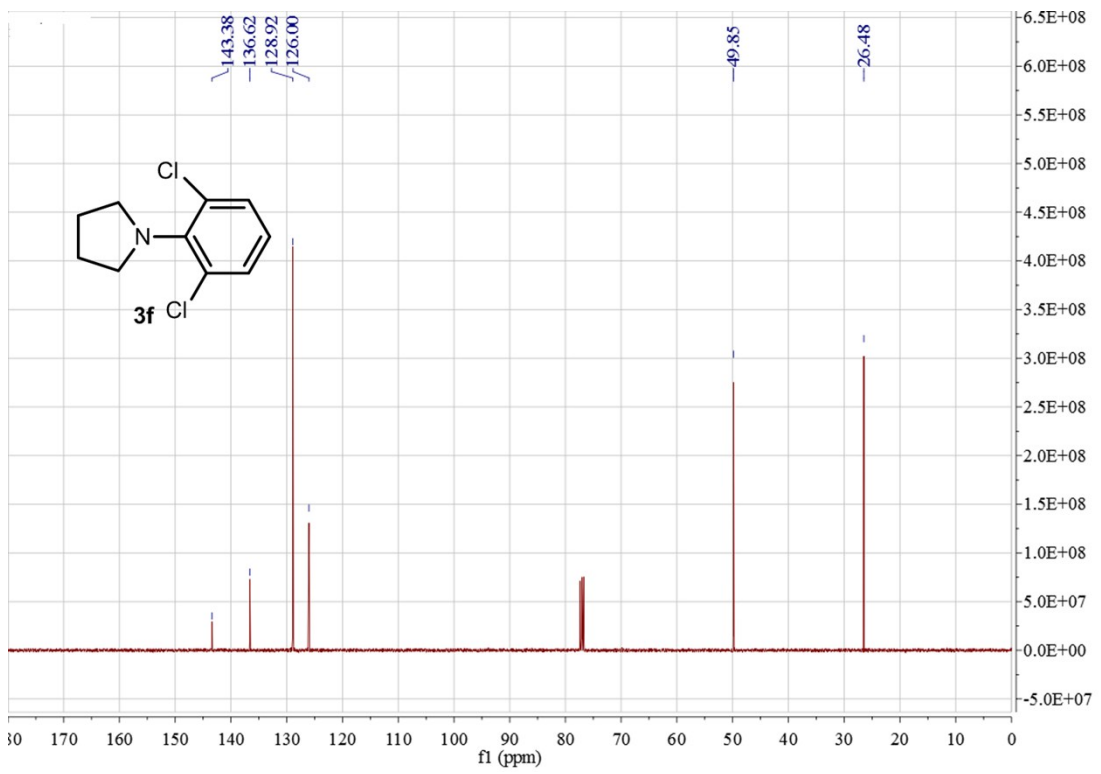

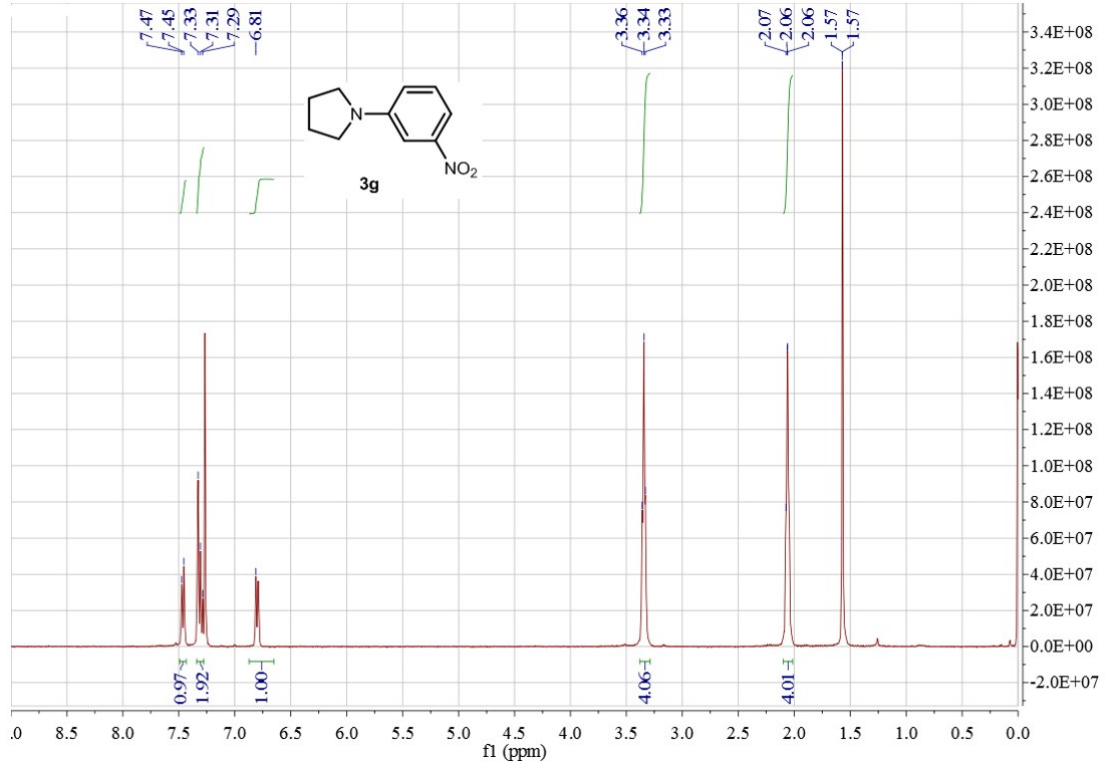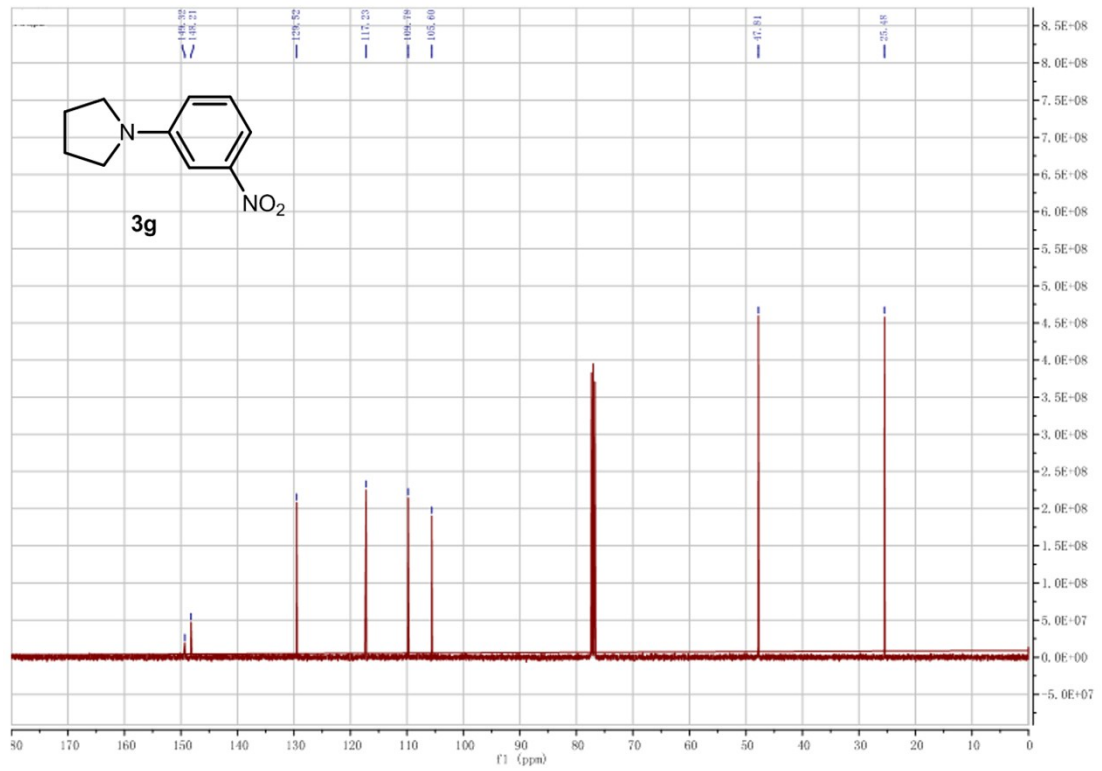

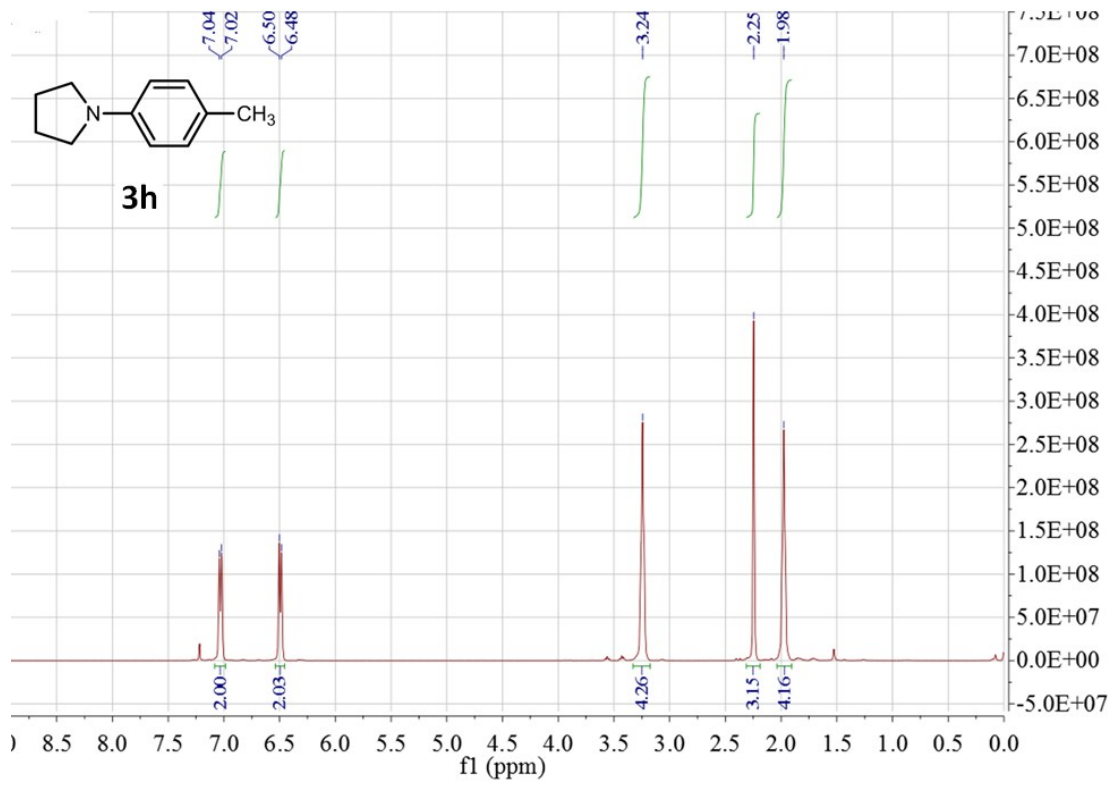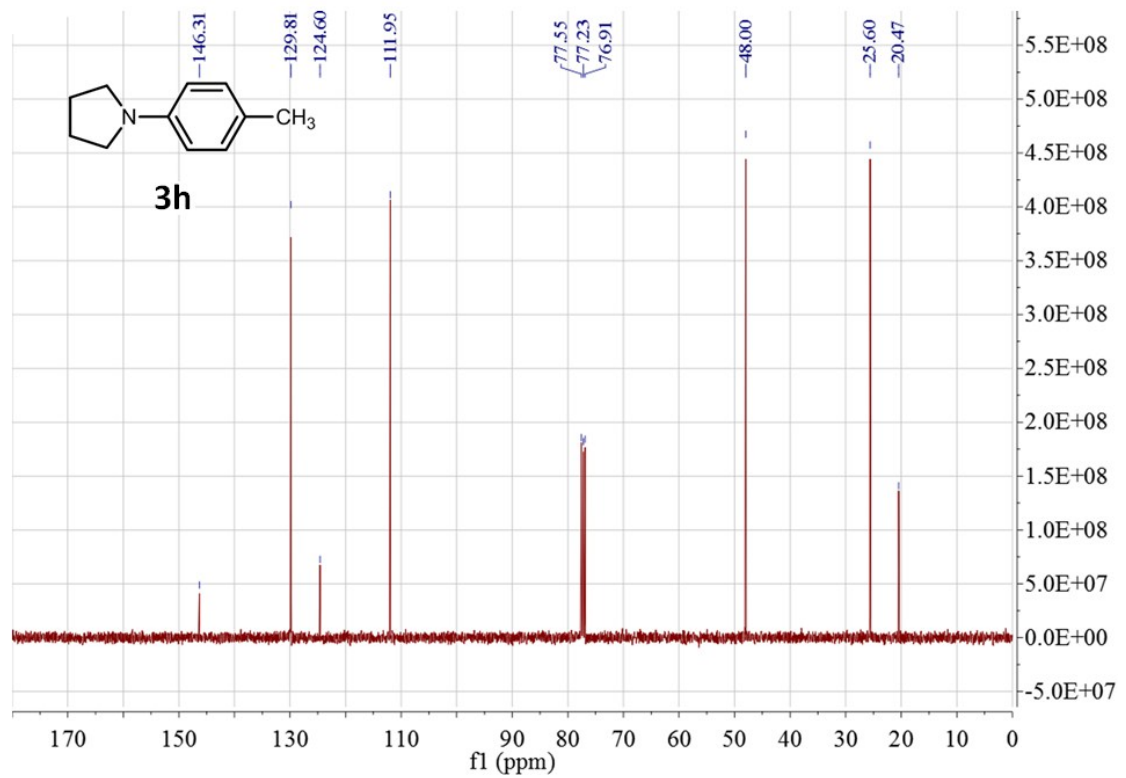

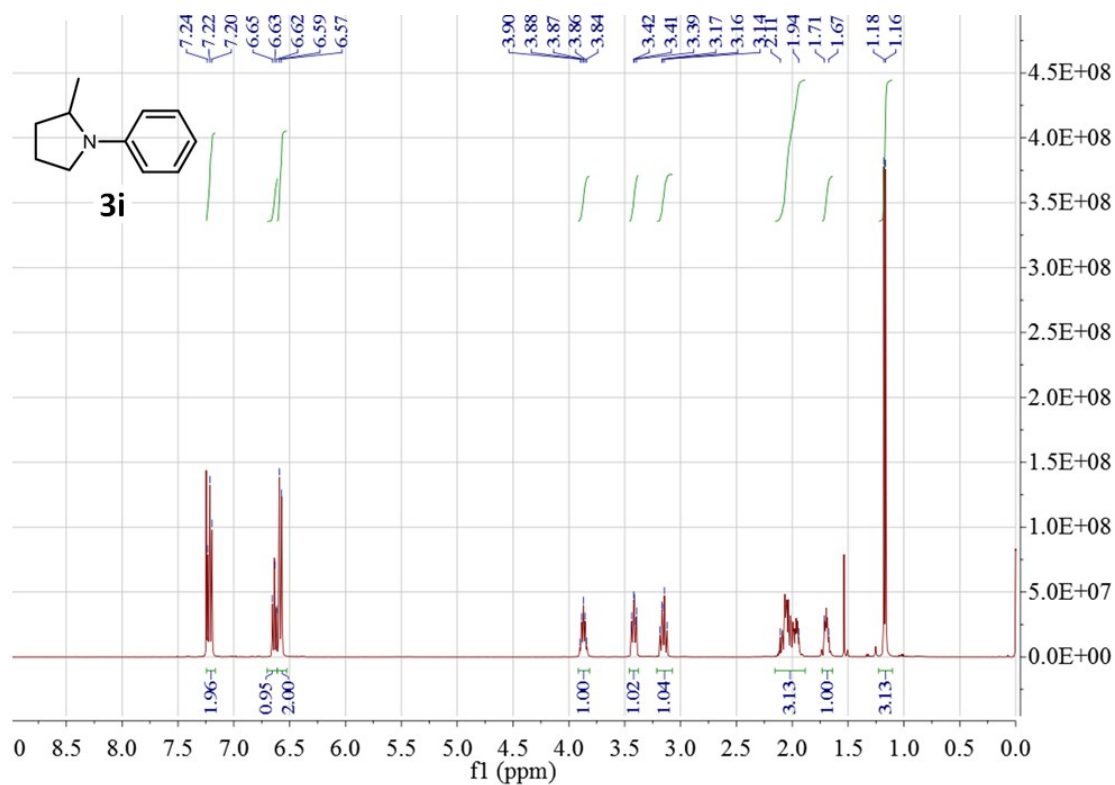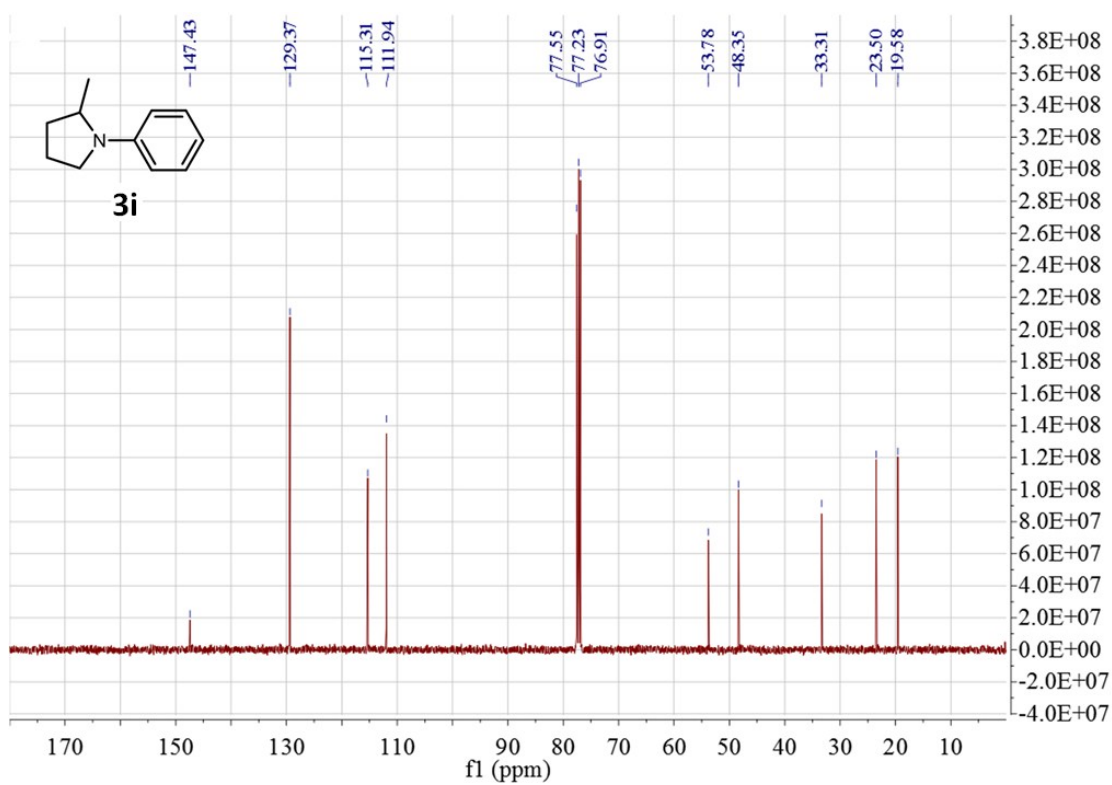

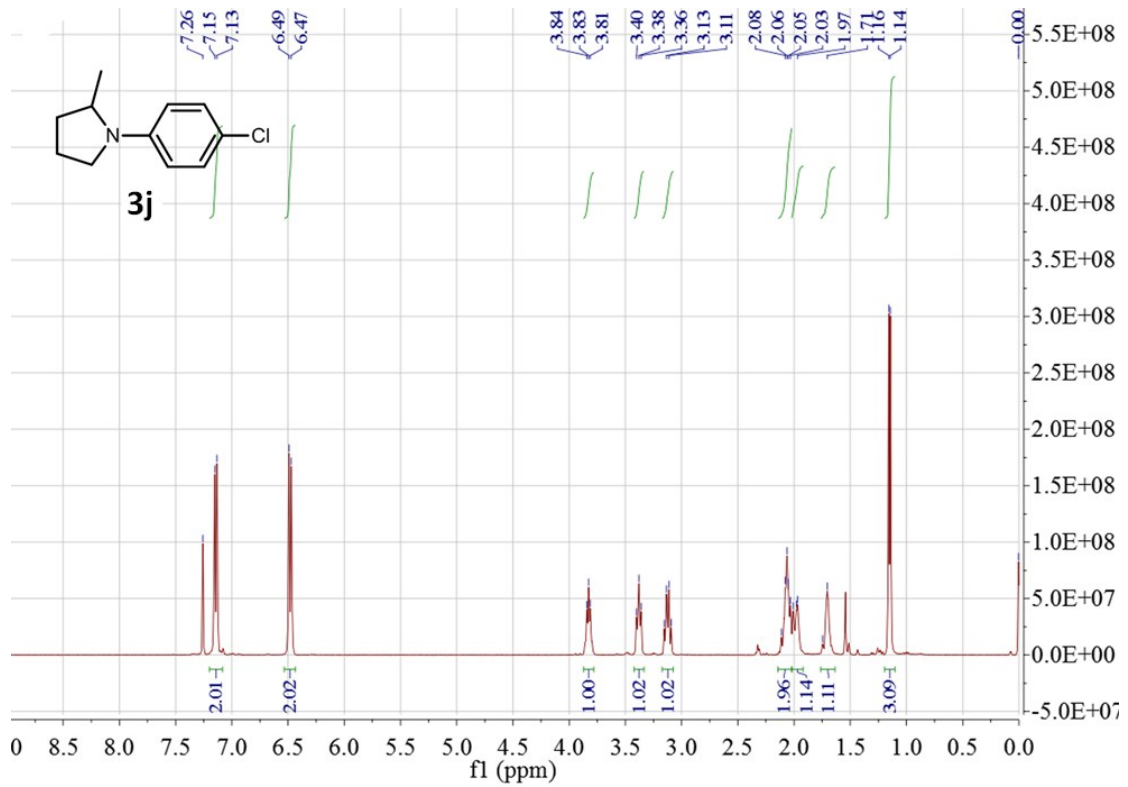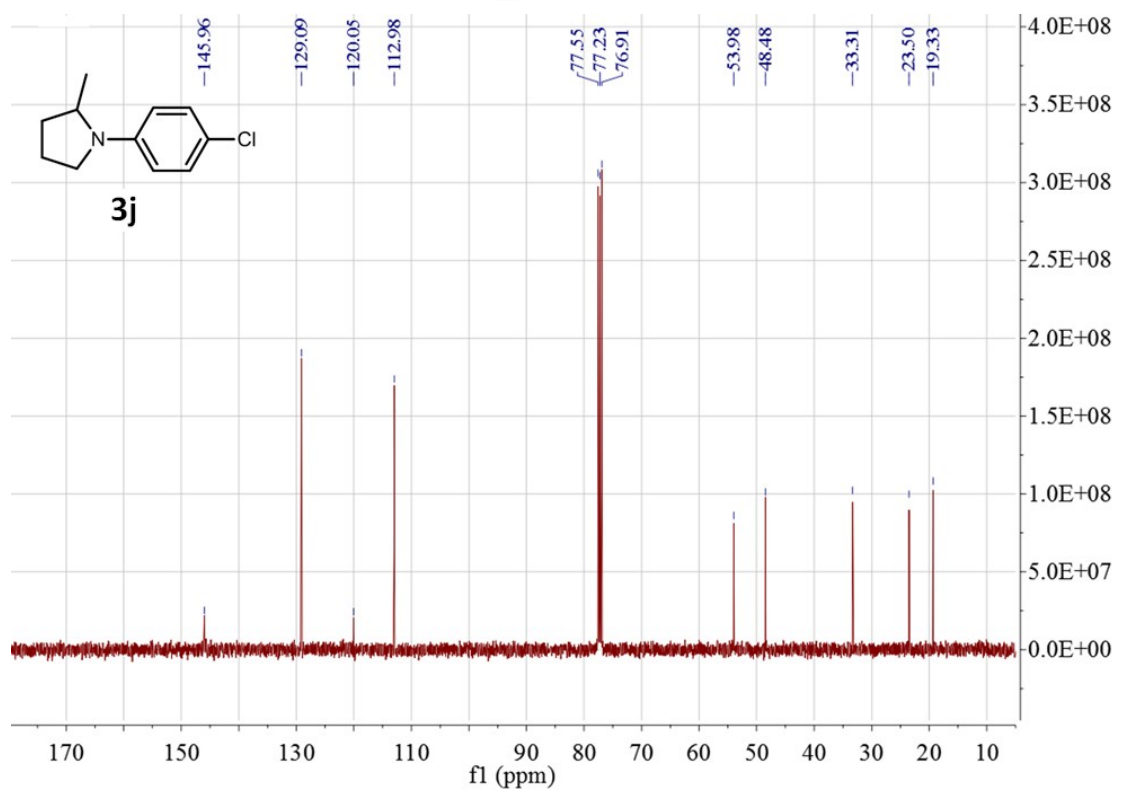

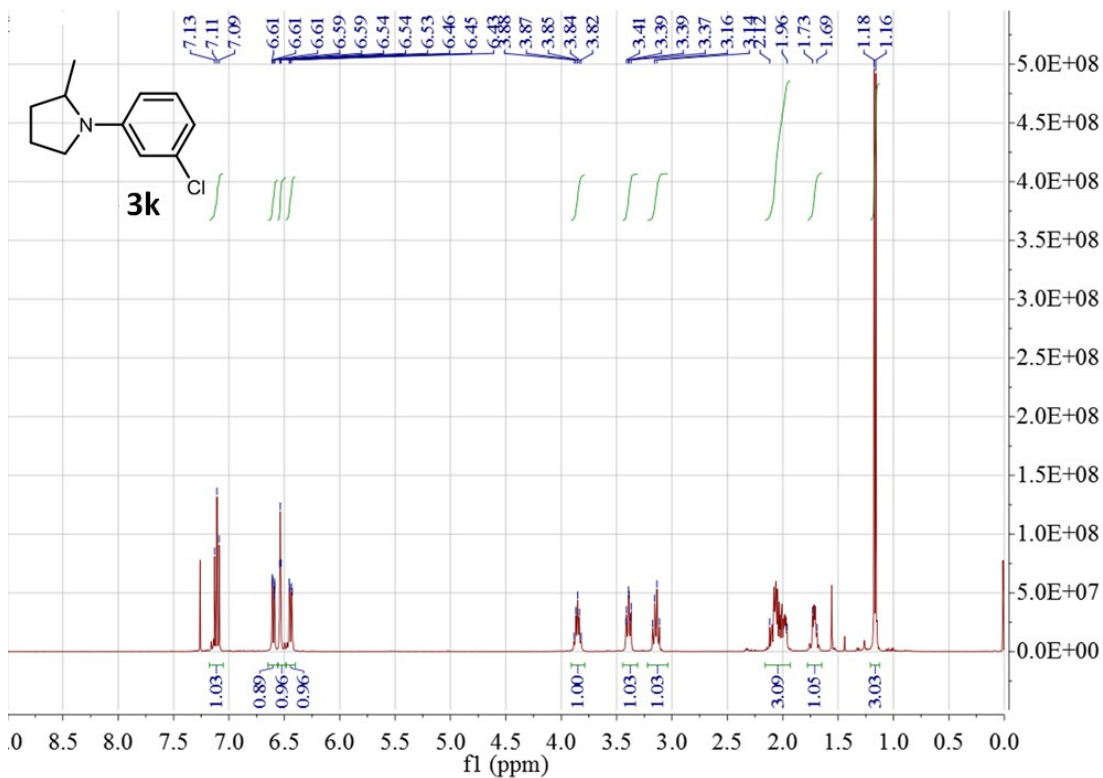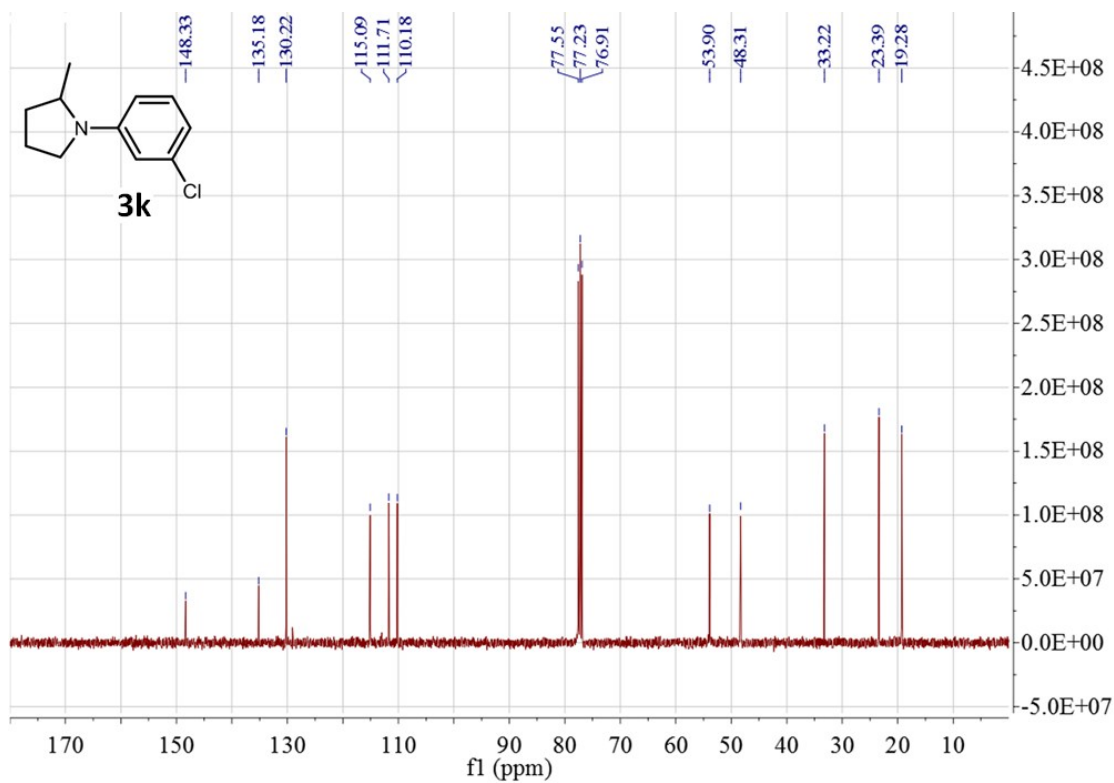



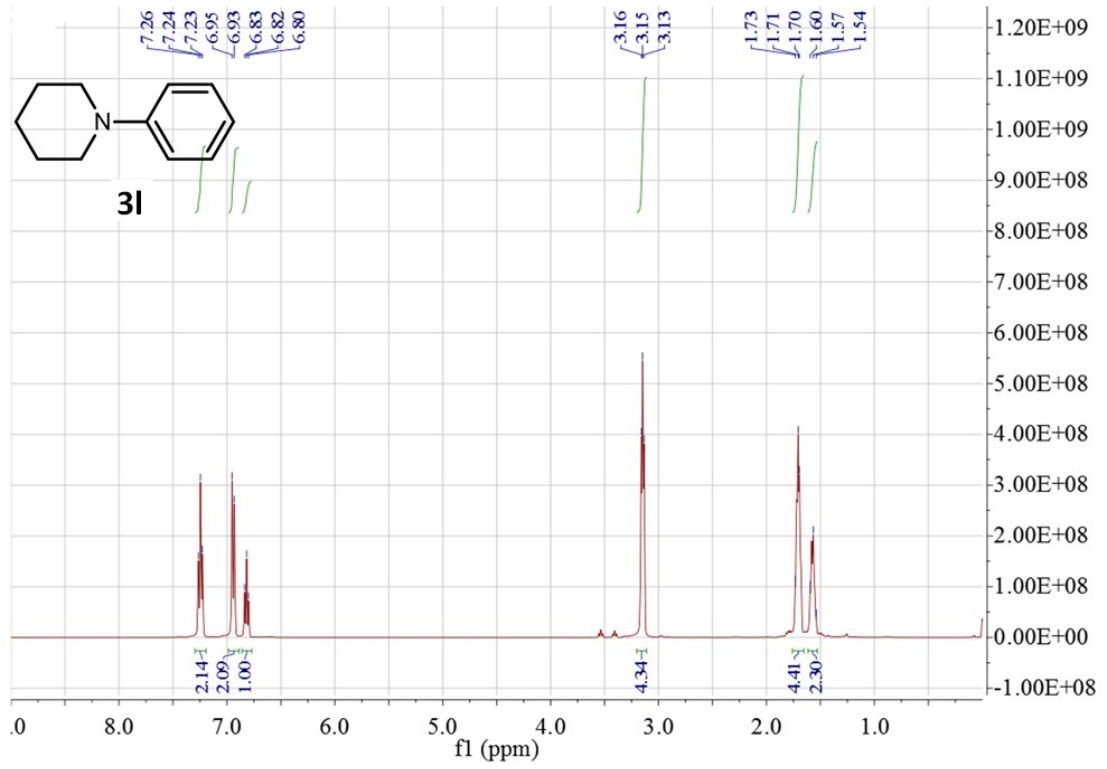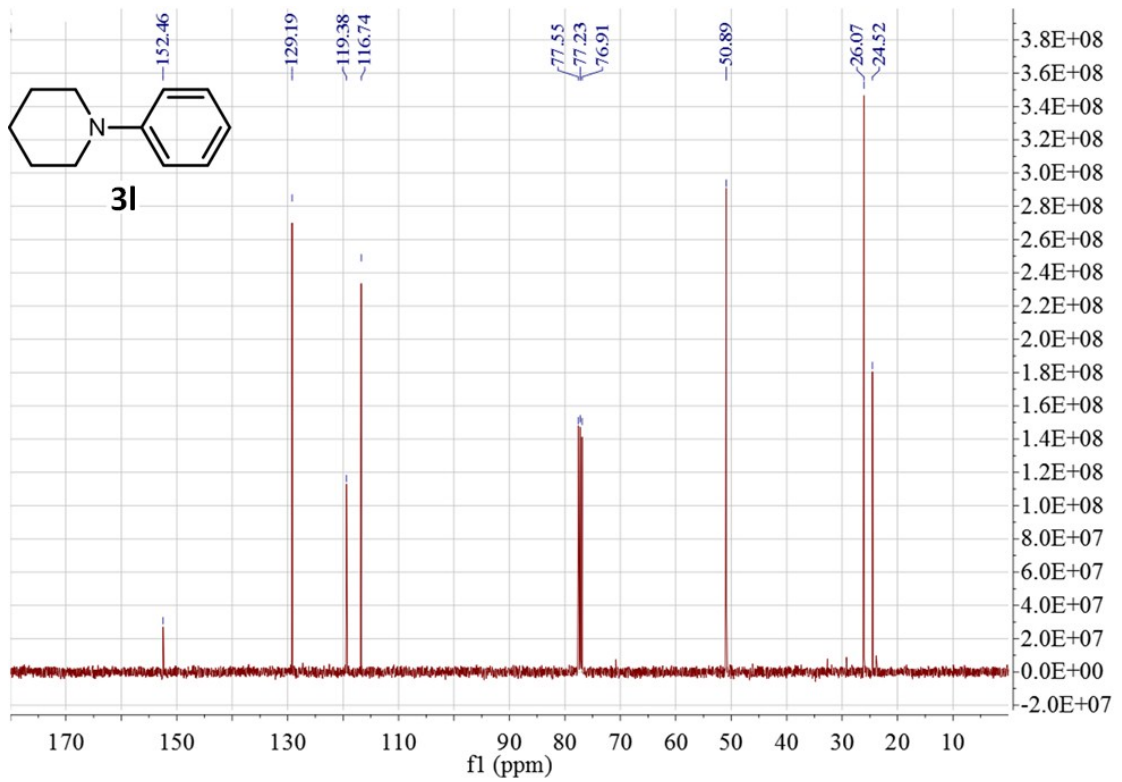

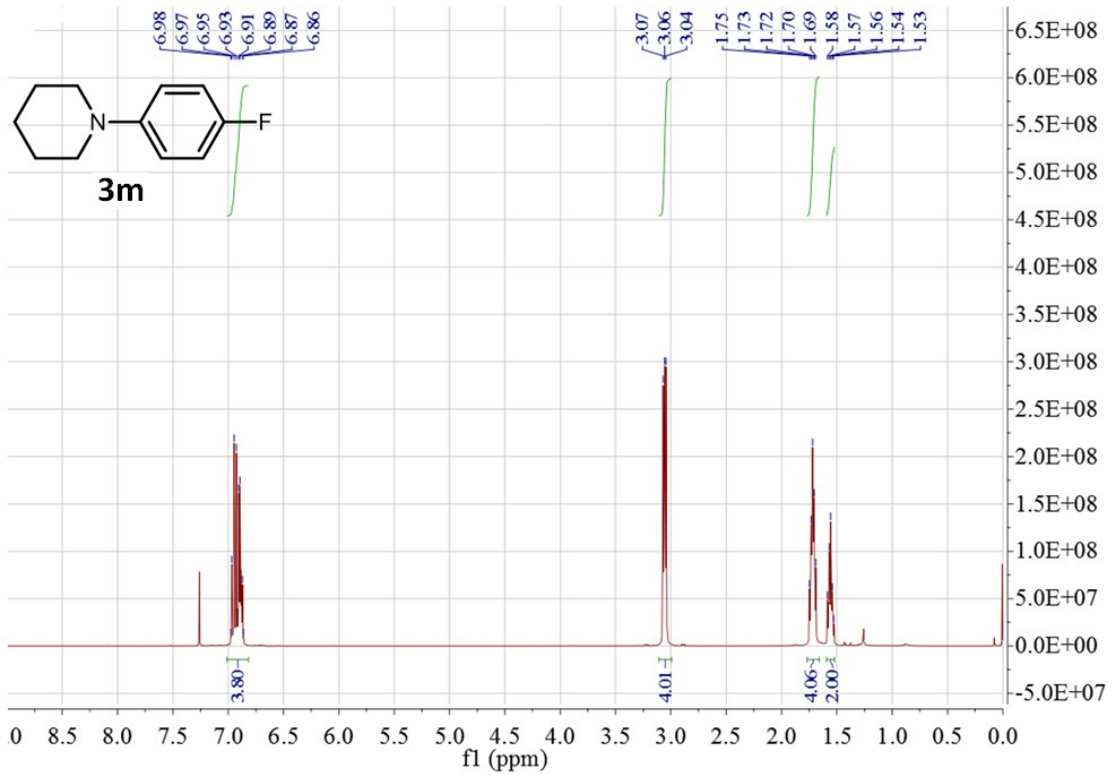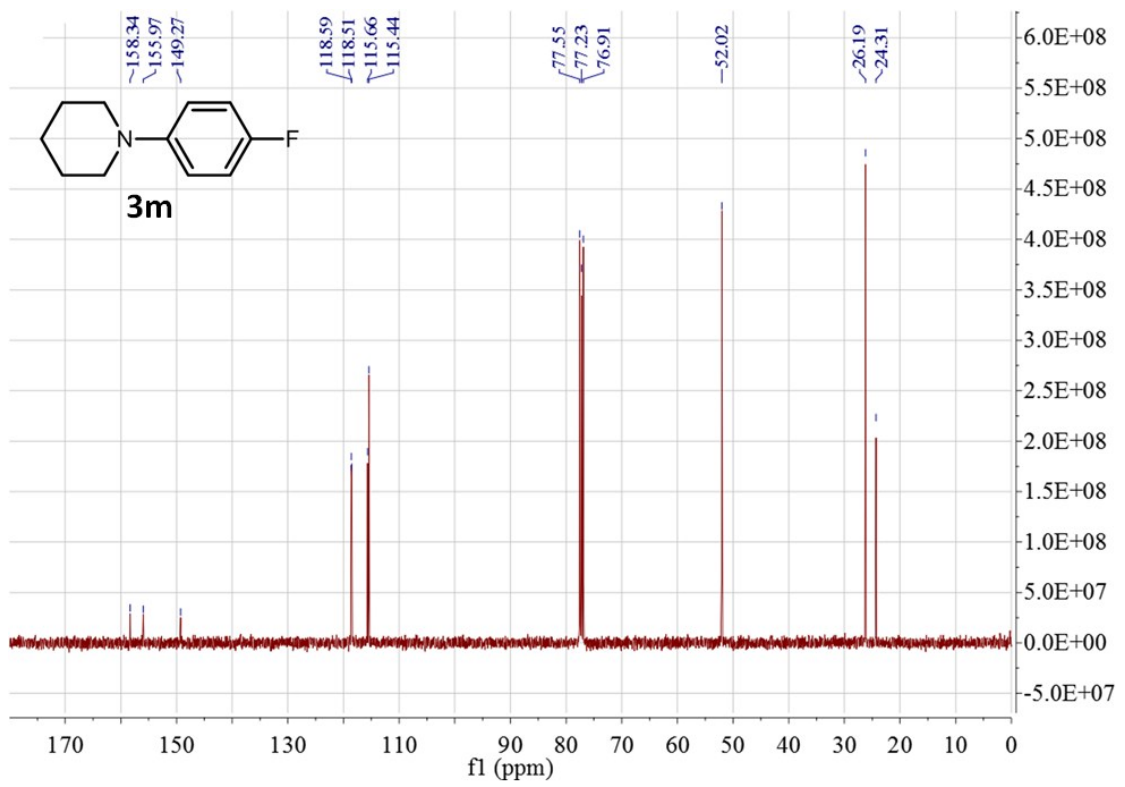

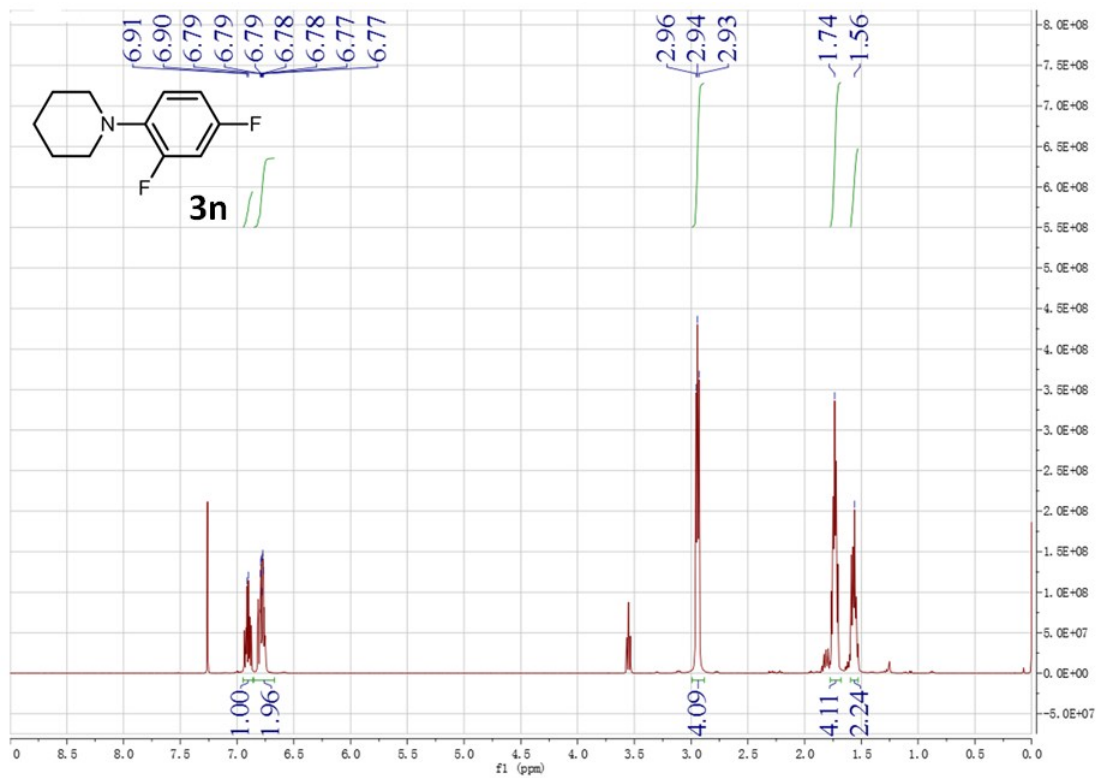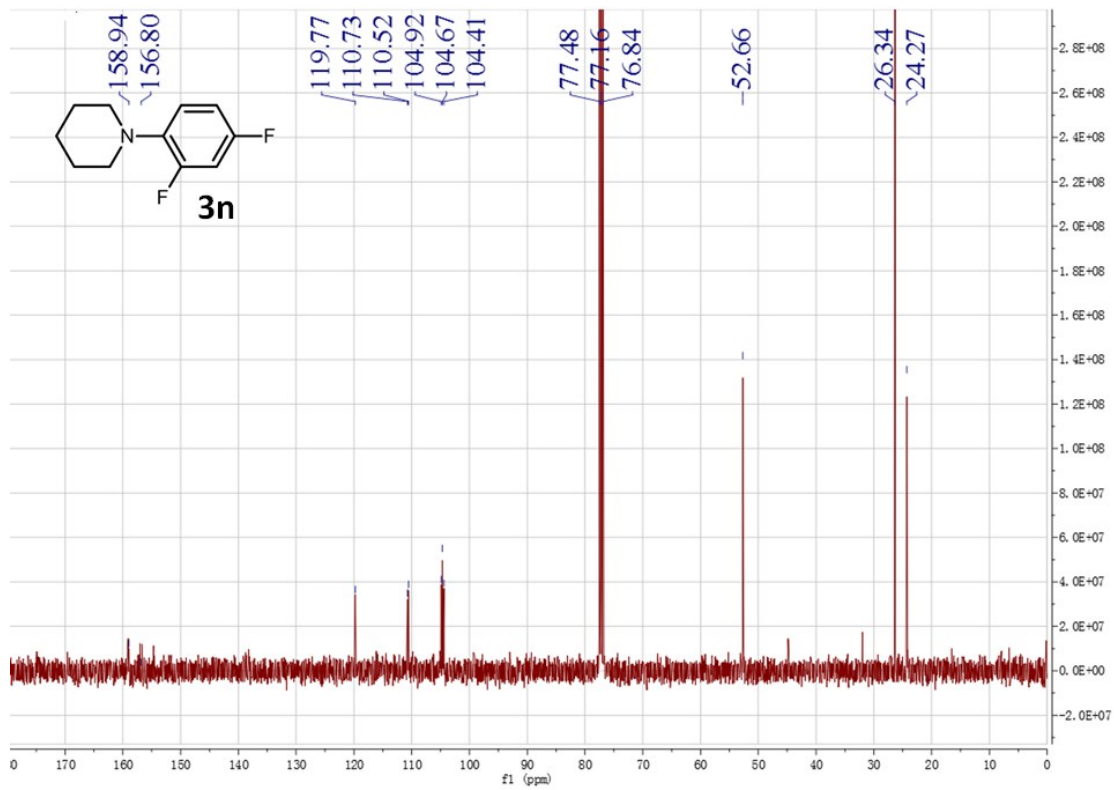

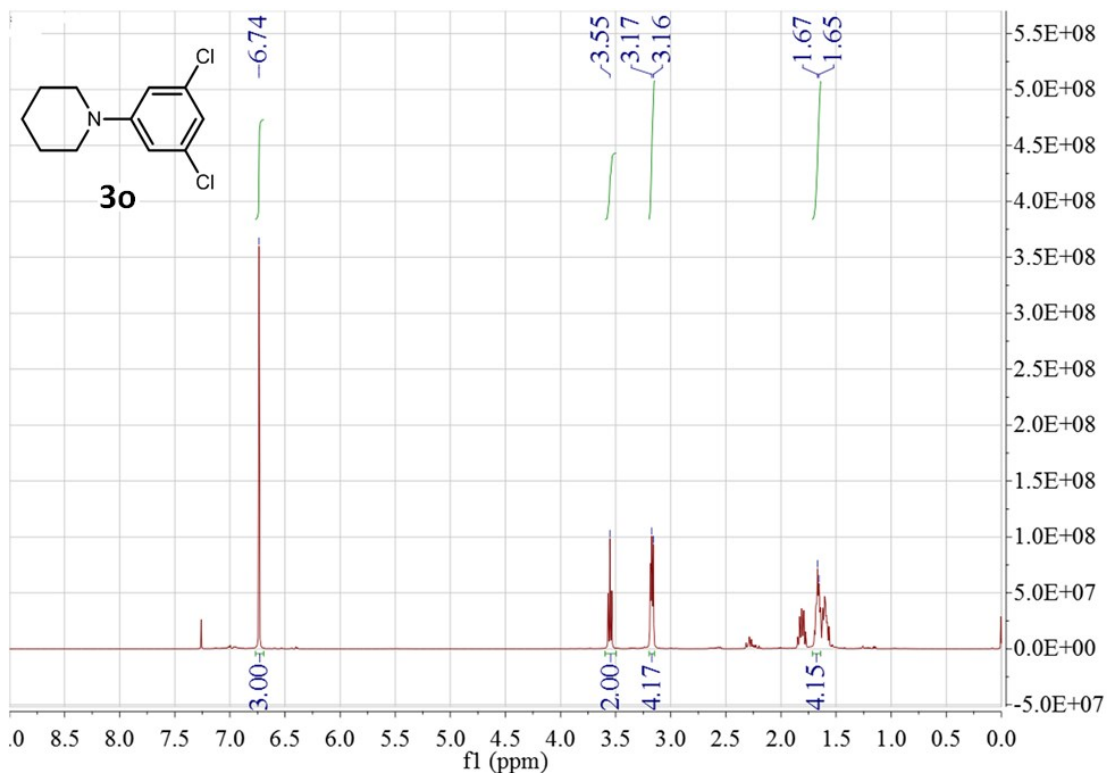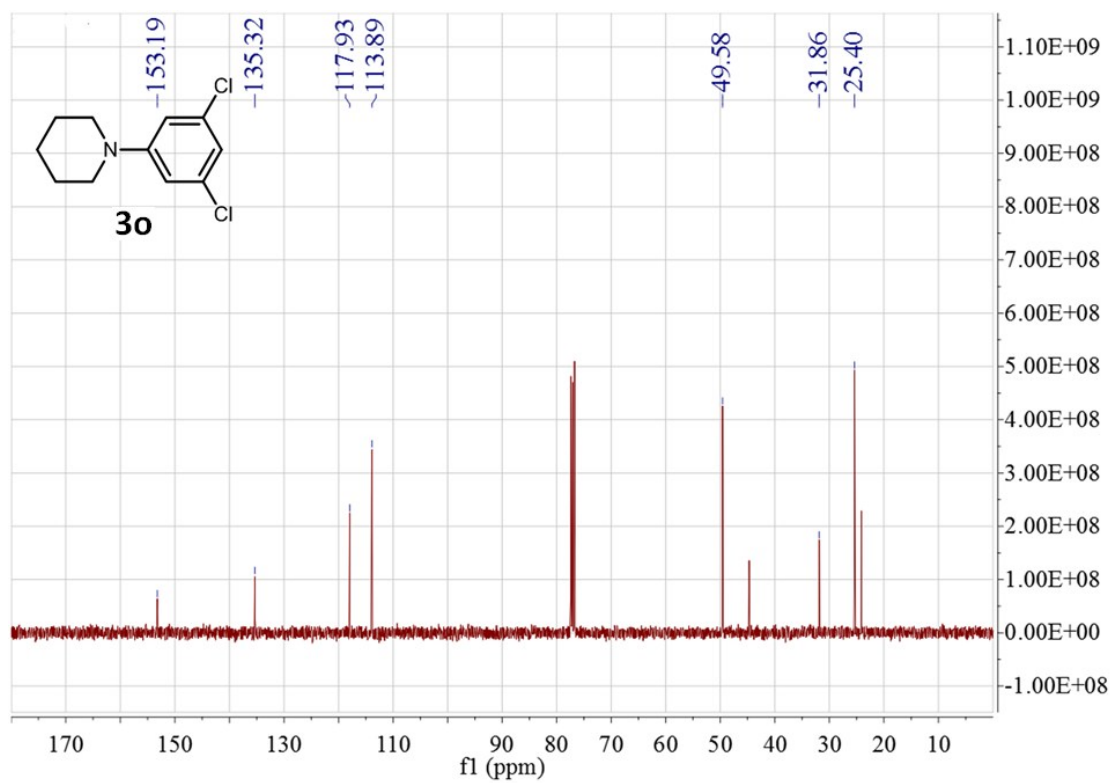

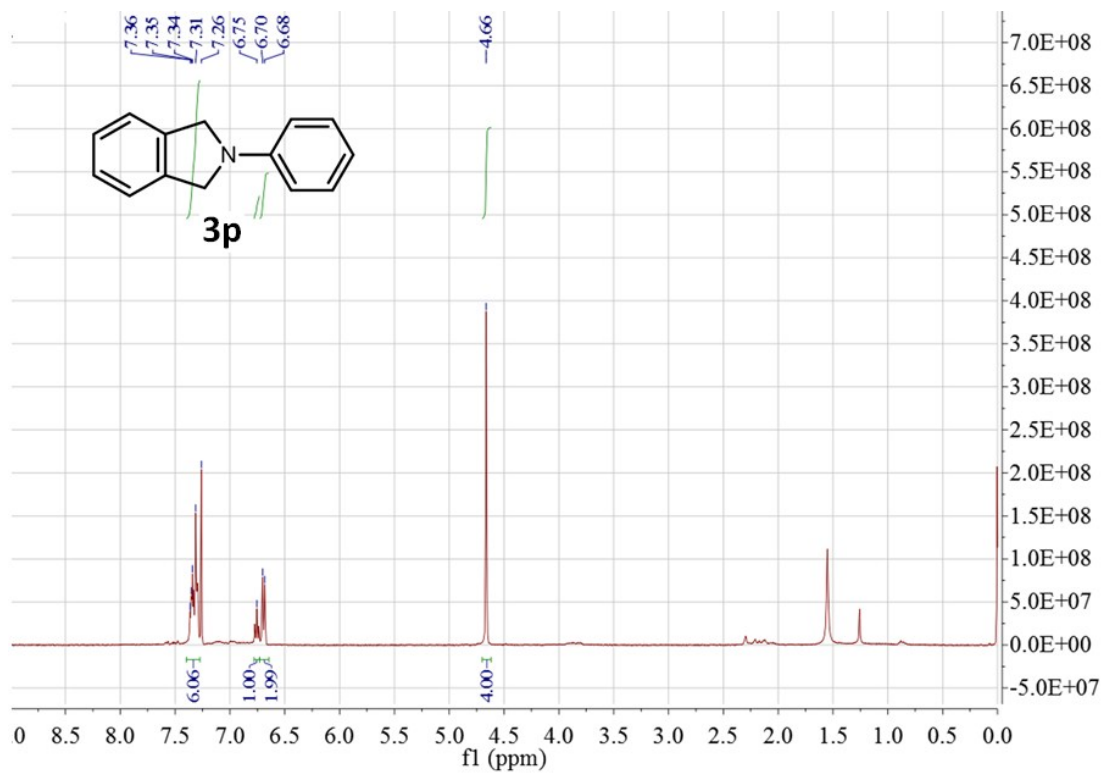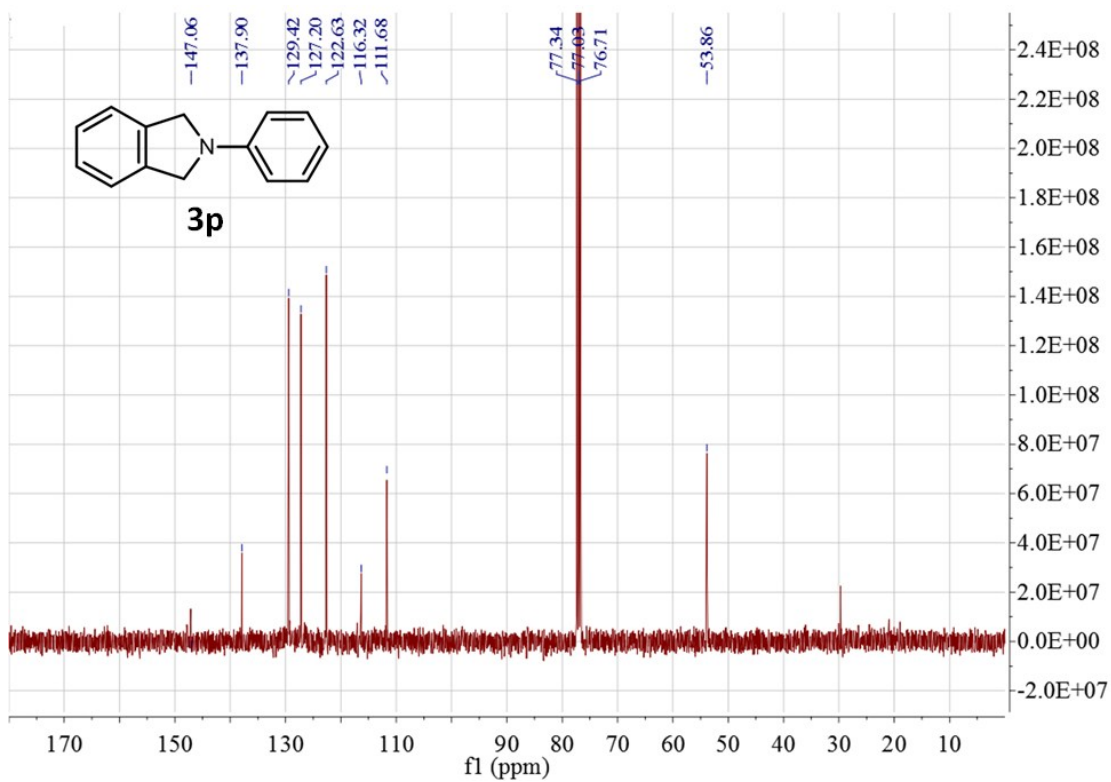

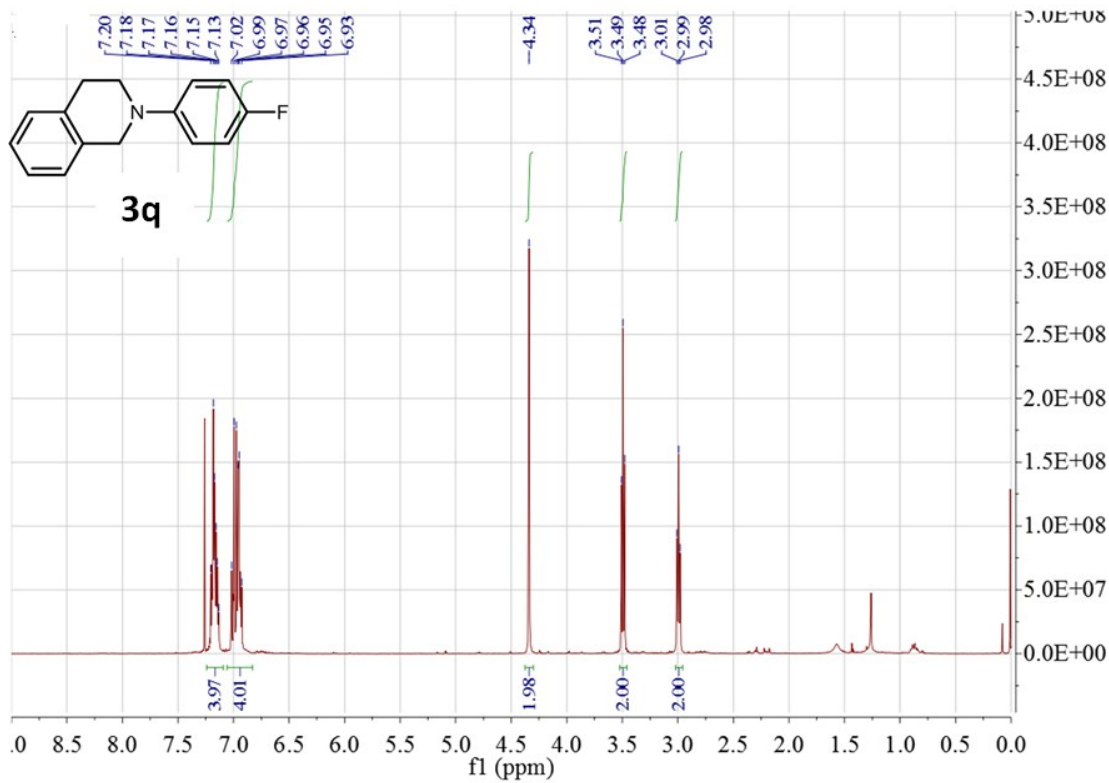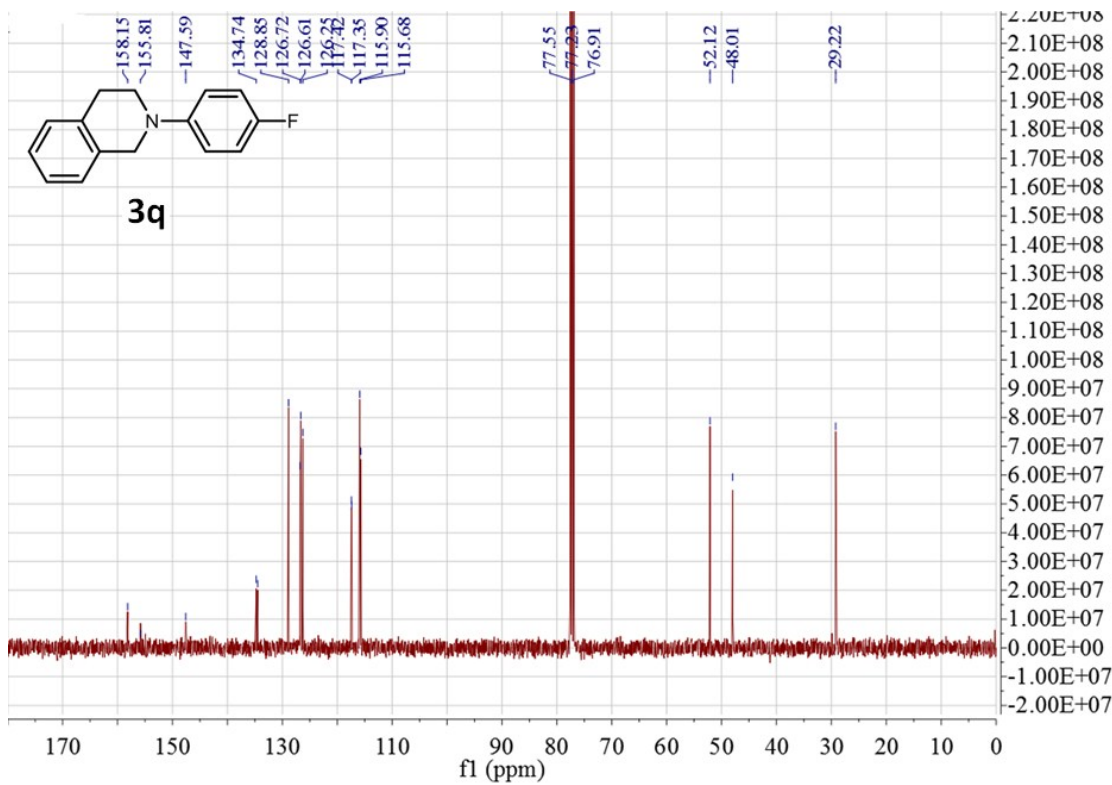

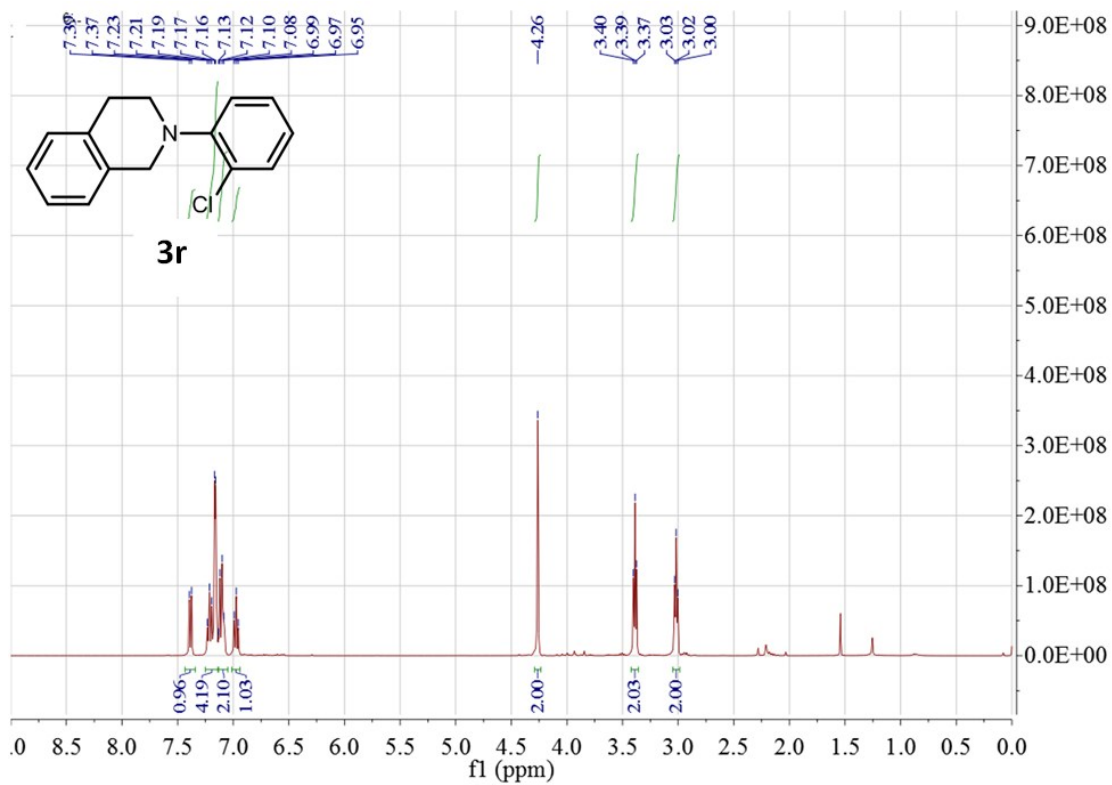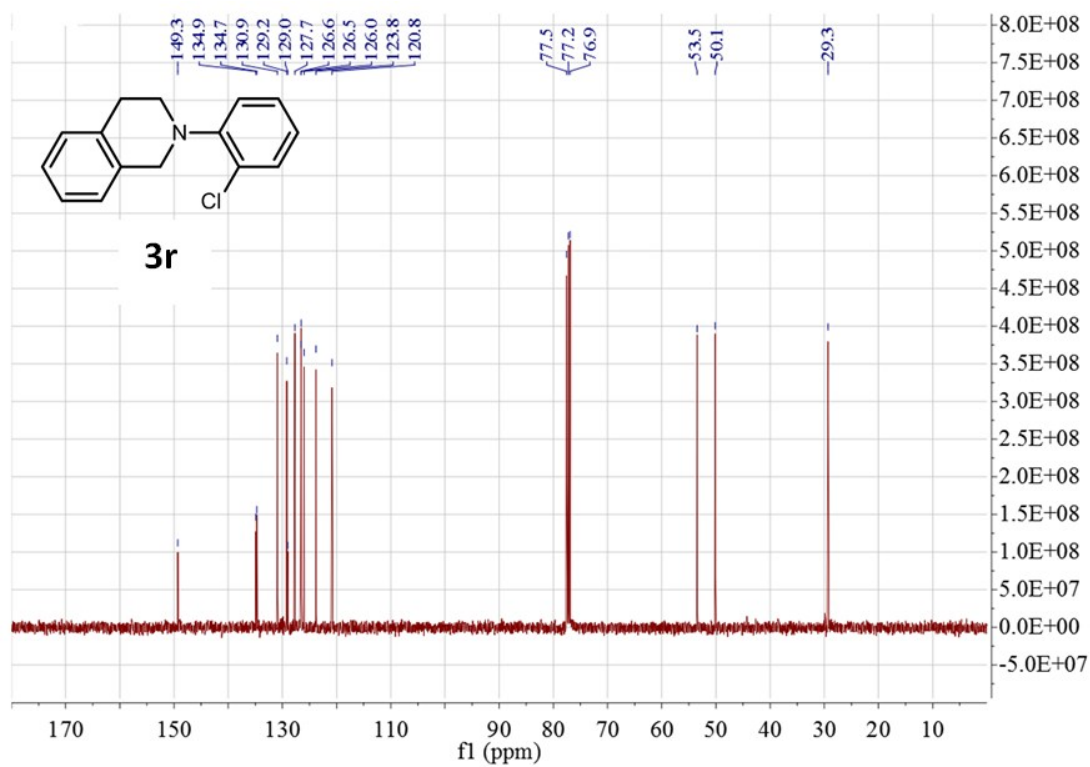



## Kinetic experiments

The reaction of 4-fluoroaniline with THF was selected in the kinetic study for the simplification of NMR. Diphenylmethane was added into the reaction mixture as an internal standard for integral. To a solution of 0.13 mL (1.2 mmol) of  $\text{TiCl}_4$  in 8 mL of dry toluene was added 0.10 mL (1.0 mmol) of 4-fluoroaniline. The mixture was stirred at room temperature for 0.5 h and 2.0 mL (20 mmol) of THF was added to gain a condition of pseudo-first order reaction. The well-mixed solution was then divided into four portions for parallel experiments that were terminated after 1 h, 2 h, 3 h and 4 h respectively. After refluxing for a certain period of time, the solution was quenched with saturated  $\text{NaHCO}_3$  solution, extracted with dichloromethane and dried over  $\text{Na}_2\text{SO}_4$ , and the solvent was removed under reduced pressure. Proton spectra were obtained under consistent conditions and the integral of the signals at 6.95 and 6.48 ppm were adopted to measure the amount of unreacted 4-fluoroaniline, using diphenylmethane as the internal standard for integral. The concentration of 4-fluoroaniline at different reaction time were listed in Table S1 and the data were used to gain the first order rate constant (Figure S1).

Table S1.

| Time (h)              | 1     | 2     | 3     | 4     |
|-----------------------|-------|-------|-------|-------|
| Concentration (mol/L) | 0.081 | 0.066 | 0.059 | 0.046 |

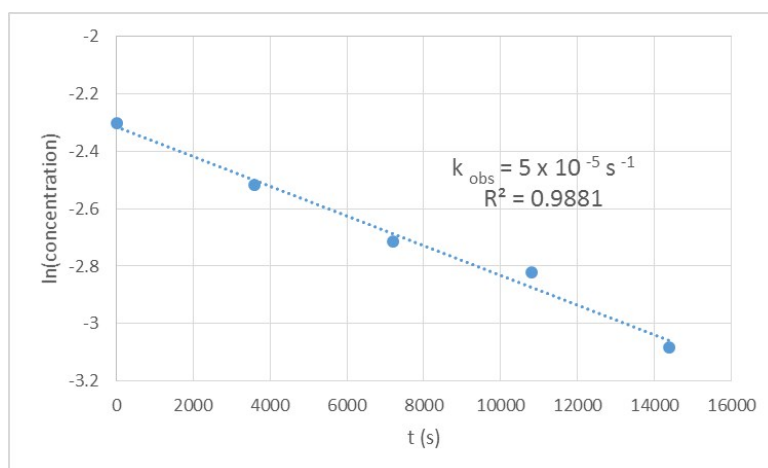

Figure S1. Change of 4-fluoroaniline concentration over time.



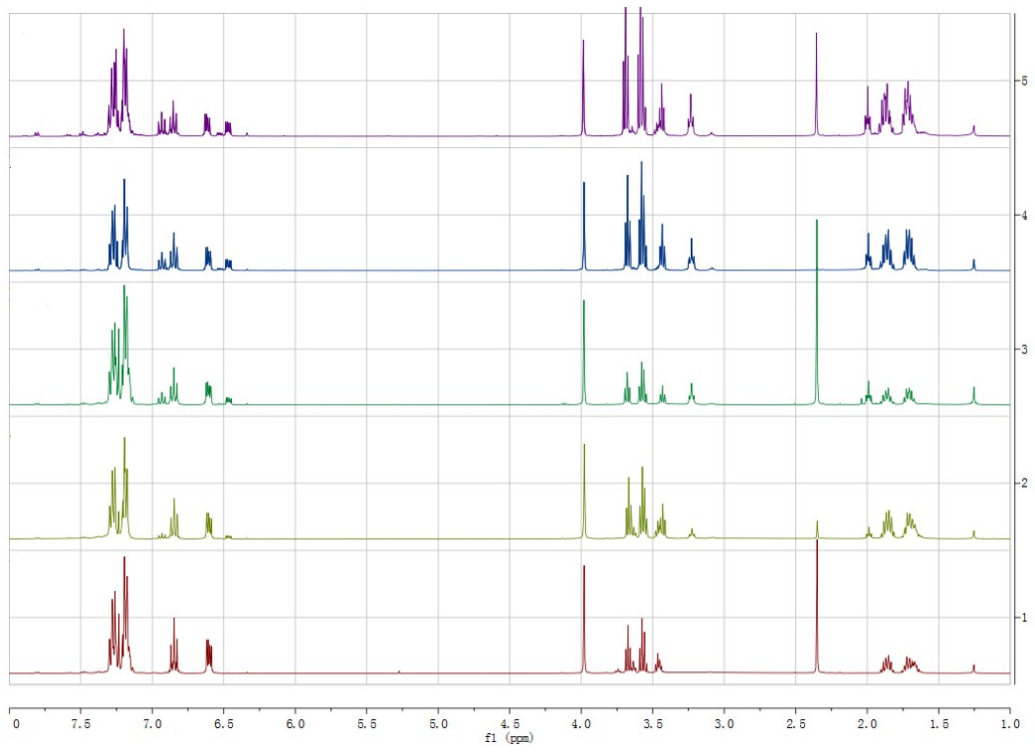

## Computational Details

All calculations were performed using Gaussian 09, Revision A.01, M. J. Frisch, G. W. Trucks, H. B. Schlegel, G. E. Scuseria, M. A. Robb, J. R. Cheeseman, G. Scalmani, V. Barone, B. Mennucci, G. A. Petersson, H. Nakatsuji, M. Caricato, X. Li, H. P. Hratchian, A. F. Izmaylov, J. Bloino, G. Zheng, J. L. Sonnenberg, M. Hada, M. Ehara, K. Toyota, R. Fukuda, J. Hasegawa, M. Ishida, T. Nakajima, Y. Honda, O. Kitao, H. Nakai, T. Vreven, J. A. Montgomery, Jr., J. E. Peralta, F. Ogliaro, M. Bearpark, J. J. Heyd, E. Brothers, K. N. Kudin, V. N. Staroverov, R. Kobayashi, J. Normand, K. Raghavachari, A. Rendell, J. C. Burant, S. S. Iyengar, J. Tomasi, M. Cossi, N. Rega, J. M. Millam, M. Klene, J. E. Knox, J. B. Cross, V. Bakken, C. Adamo, J. Jaramillo, R. Gomperts, R. E. Stratmann, O. Yazyev, A. J. Austin, R. Cammi, C. Pomelli, J. W. Ochterski, R. L. Martin, K. Morokuma, V. G. Zakrzewski, G. A. Voth, P. Salvador, J. J. Dannenberg, S. Dapprich, A. D. Daniels, O. Farkas, J. B. Foresman, J. V. Ortiz, J. Cioslowski, and D. J. Fox, Gaussian, Inc., Wallingford CT, 2009.

Full geometrical optimizations were carried out using Gaussian 09 suite of programs, employing the Minnesota density functional M06. The 6-31+G\*\* basis set was used on nonmetallic atoms while the SDD basis set was employed on Ti. The solvent effect was dealt with using conductor-like polarizable continuum model (CPCM) in toluene. Frequency calculations were performed at the same level to identify all of the stationary points as minima (zero imaginary frequency) or transition states (one imaginary frequency) and intrinsic reaction coordinates (IRC) were calculated for each transition state to confirm that the structure indeed connects the two relevant minima.

Cartesian coordinates and energetics for all stationary points are given below.

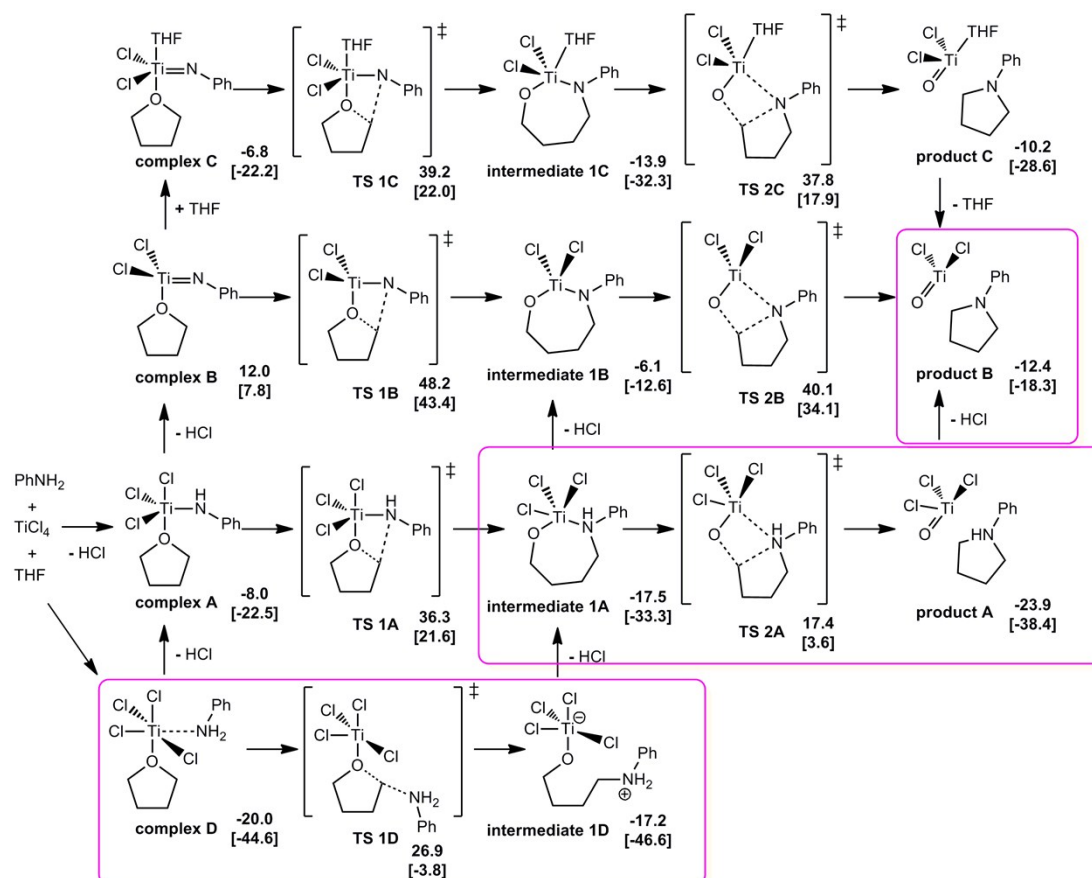

## $\text{TiCl}_4$

|                                              |              |
|----------------------------------------------|--------------|
| Zero-point correction=                       | 0.005671     |
| (Hartree/Particle)                           |              |
| Thermal correction to Energy=                | 0.012978     |
| Thermal correction to Enthalpy=              | 0.013922     |
| Thermal correction to Gibbs Free Energy=     | -0.027445    |
| Sum of electronic and zero-point Energies=   | -1899.235308 |
| Sum of electronic and thermal Energies=      | -1899.228001 |
| Sum of electronic and thermal Enthalpies=    | -1899.227057 |
| Sum of electronic and thermal Free Energies= | -1899.268424 |

|       | E (Thermal) | CV             | S              |
|-------|-------------|----------------|----------------|
|       | KCal/Mol    | Cal/Mol-Kelvin | Cal/Mol-Kelvin |
| Total | 8.144       | 20.869         | 87.064         |
| Ti    | 0.00000     | 0.00000        | 0.00000        |
| Cl    | 0.00000     | 1.76958        | 1.24876        |
| Cl    | 1.76958     | 0.00000        | -1.24876       |
| Cl    | -1.76958    | 0.00000        | -1.24876       |
| Cl    | 0.00000     | -1.76958       | 1.24876        |

## Aniline

|                                              |             |
|----------------------------------------------|-------------|
| Zero-point correction=                       | 0.116880    |
| (Hartree/Particle)                           |             |
| Thermal correction to Energy=                | 0.122696    |
| Thermal correction to Enthalpy=              | 0.123640    |
| Thermal correction to Gibbs Free Energy=     | 0.087731    |
| Sum of electronic and zero-point Energies=   | -287.267089 |
| Sum of electronic and thermal Energies=      | -287.261273 |
| Sum of electronic and thermal Enthalpies=    | -287.260328 |
| Sum of electronic and thermal Free Energies= | -287.296238 |

|       | E (Thermal) |          | CV             | S              |
|-------|-------------|----------|----------------|----------------|
|       | KCal/Mol    |          | Cal/Mol-Kelvin | Cal/Mol-Kelvin |
| Total | 76.869      |          | 23.261         | 75.541         |
| C     | 1.16732     | -1.19891 | 0.00347        |                |
| C     | -0.22126    | -1.20472 | -0.00574       |                |
| C     | -0.93620    | 0.00002  | -0.01086       |                |
| C     | -0.22122    | 1.20475  | -0.00573       |                |
| C     | 1.16736     | 1.19889  | 0.00346        |                |
| C     | 1.87579     | -0.00002 | 0.00838        |                |
| H     | 1.70228     | -2.14779 | 0.00959        |                |
| H     | -0.76789    | -2.14848 | -0.01226       |                |
| H     | -0.76782    | 2.14853  | -0.01222       |                |
| H     | 1.70235     | 2.14775  | 0.00958        |                |
| H     | 2.96366     | -0.00004 | 0.01741        |                |
| N     | -2.32648    | 0.00000  | -0.07717       |                |
| H     | -2.76899    | -0.83617 | 0.28515        |                |
| H     | -2.76899    | 0.83622  | 0.28501        |                |

## THF

|                                              |             |
|----------------------------------------------|-------------|
| Zero-point correction=                       | 0.116894    |
| (Hartree/Particle)                           |             |
| Thermal correction to Energy=                | 0.120947    |
| Thermal correction to Enthalpy=              | 0.121891    |
| Thermal correction to Gibbs Free Energy=     | 0.089977    |
| Sum of electronic and zero-point Energies=   | -232.170612 |
| Sum of electronic and thermal Energies=      | -232.166559 |
| Sum of electronic and thermal Enthalpies=    | -232.165615 |
| Sum of electronic and thermal Free Energies= | -232.197528 |

|       | E (Thermal) |          | CV             | S              |
|-------|-------------|----------|----------------|----------------|
|       | KCal/Mol    |          | Cal/Mol-Kelvin | Cal/Mol-Kelvin |
| Total | 76.045      |          | 16.880         | 71.592         |
| C     | -1.15379    | -0.41196 | 0.11000        |                |
| O     | -0.04745    | -1.19641 | -0.29246       |                |
| C     | 1.08621     | -0.51429 | 0.20224        |                |
| C     | 0.82477     | 0.95431  | -0.11334       |                |
| C     | -0.70598    | 1.05643  | 0.00968        |                |
| H     | -2.00168    | -0.66738 | -0.53513       |                |
| H     | -1.42906    | -0.65967 | 1.15146        |                |
| H     | 1.17833     | -0.66715 | 1.29484        |                |
| H     | 1.97623     | -0.93238 | -0.28074       |                |
| H     | 1.35857     | 1.63281  | 0.56136        |                |
| H     | 1.14614     | 1.17969  | -1.13744       |                |
| H     | -1.01257    | 1.62353  | 0.89633        |                |
| H     | -1.14363    | 1.55496  | -0.86244       |                |

## HCl

|                                              |             |
|----------------------------------------------|-------------|
| Zero-point correction=                       | 0.006691    |
| (Hartree/Particle)                           |             |
| Thermal correction to Energy=                | 0.009051    |
| Thermal correction to Enthalpy=              | 0.009996    |
| Thermal correction to Gibbs Free Energy=     | -0.011200   |
| Sum of electronic and zero-point Energies=   | -460.760851 |
| Sum of electronic and thermal Energies=      | -460.758490 |
| Sum of electronic and thermal Enthalpies=    | -460.757546 |
| Sum of electronic and thermal Free Energies= | -460.778742 |

|       | E (Thermal) |         | CV             | S              |
|-------|-------------|---------|----------------|----------------|
|       | KCal/Mol    |         | Cal/Mol-Kelvin | Cal/Mol-Kelvin |
| Total | 5.680       |         | 4.968          | 44.611         |
| Cl    | 0.00000     | 0.00000 | 0.07159        |                |
| H     | 0.00000     | 0.00000 | -1.21697       |                |

## Complex A

|                                          |          |
|------------------------------------------|----------|
| Zero-point correction=                   | 0.229168 |
| (Hartree/Particle)                       |          |
| Thermal correction to Energy=            | 0.247284 |
| Thermal correction to Enthalpy=          | 0.248228 |
| Thermal correction to Gibbs Free Energy= | 0.181007 |

|                                              |              |
|----------------------------------------------|--------------|
| Sum of electronic and zero-point Energies=   | -1957.948002 |
| Sum of electronic and thermal Energies=      | -1957.929886 |
| Sum of electronic and thermal Enthalpies=    | -1957.928941 |
| Sum of electronic and thermal Free Energies= | -1957.996162 |

|       | E (Thermal) | CV             | S              |
|-------|-------------|----------------|----------------|
|       | KCal/Mol    | Cal/Mol-Kelvin | Cal/Mol-Kelvin |
| Total | 155.173     | 64.565         | 141.478        |
| C     | -2.69462    | -1.35218       | -1.28904       |
| C     | -1.72796    | -1.10345       | -0.30410       |
| C     | -2.13641    | -0.65212       | 0.95859        |
| C     | -3.48317    | -0.42921       | 1.21211        |
| C     | -4.44058    | -0.65969       | 0.22598        |
| C     | -4.03895    | -1.12960       | -1.02185       |
| H     | -2.37894    | -1.70797       | -2.27012       |
| H     | -1.38950    | -0.48168       | 1.73283        |
| H     | -3.78887    | -0.07880       | 2.19650        |
| H     | -5.49405    | -0.48263       | 0.43286        |
| H     | -4.77795    | -1.32073       | -1.79798       |
| C     | 0.62506     | 2.40212        | 1.02703        |
| H     | 0.42119     | 2.13761        | 2.06869        |
| H     | 1.71099     | 2.50118        | 0.88362        |
| C     | -0.60167    | 1.83139        | -0.92916       |
| H     | -0.30227    | 1.28606        | -1.82897       |
| H     | -1.66371    | 1.63844        | -0.71997       |
| O     | 0.16411     | 1.30253        | 0.19264        |
| C     | -0.27636    | 3.30699        | -0.95708       |
| H     | 0.67217     | 3.47853        | -1.48495       |
| H     | -1.05966    | 3.89110        | -1.45122       |
| C     | -0.12456    | 3.61818        | 0.52598        |
| H     | 0.42284     | 4.54483        | 0.72708        |
| H     | -1.10966    | 3.68868        | 1.00690        |
| Cl    | 2.41813     | 0.54069        | -1.57662       |
| Ti    | 1.24384     | -0.58301       | 0.01946        |
| Cl    | 2.43467     | -2.47259       | -0.23433       |
| Cl    | 1.39935     | -0.47409       | 2.25177        |
| N     | -0.37197    | -1.27359       | -0.60333       |
| H     | -0.22749    | -1.86600       | -1.42585       |

## TS 1A

|                        |          |
|------------------------|----------|
| Zero-point correction= | 0.224877 |
| (Hartree/Particle)     |          |

|                                              |              |
|----------------------------------------------|--------------|
| Thermal correction to Energy=                | 0.242750     |
| Thermal correction to Enthalpy=              | 0.243694     |
| Thermal correction to Gibbs Free Energy=     | 0.176995     |
| Sum of electronic and zero-point Energies=   | -1957.877666 |
| Sum of electronic and thermal Energies=      | -1957.859793 |
| Sum of electronic and thermal Enthalpies=    | -1957.858849 |
| Sum of electronic and thermal Free Energies= | -1957.925547 |

|       | E (Thermal) | CV             |          | S              |
|-------|-------------|----------------|----------|----------------|
|       | KCal/Mol    | Cal/Mol-Kelvin |          | Cal/Mol-Kelvin |
| Total | 152.328     | 64.886         |          | 140.379        |
| C     | -2.49675    | 0.06459        | 0.85150  |                |
| C     | -2.05404    | 0.29511        | -0.46267 |                |
| C     | -3.00010    | 0.61712        | -1.45004 |                |
| C     | -4.35082    | 0.67621        | -1.13717 |                |
| C     | -4.78423    | 0.43028        | 0.16402  |                |
| C     | -3.84983    | 0.12877        | 1.15308  |                |
| H     | -1.76825    | -0.17624       | 1.62624  |                |
| H     | -2.66265    | 0.80433        | -2.47019 |                |
| H     | -5.07192    | 0.91435        | -1.91723 |                |
| H     | -5.84381    | 0.47563        | 0.40712  |                |
| H     | -4.17785    | -0.05954       | 2.17387  |                |
| Cl    | 2.47817     | -2.02271       | -1.08773 |                |
| Ti    | 0.86426     | -0.76796       | -0.10278 |                |
| Cl    | -0.50022    | -2.58047       | 0.24715  |                |
| Cl    | 1.31086     | -0.37686       | 2.05516  |                |
| N     | -0.69624    | 0.27837        | -0.75547 |                |
| H     | -0.51650    | 0.58803        | -1.71368 |                |
| C     | 0.23152     | 2.39009        | 0.05101  |                |
| H     | -0.02796    | 2.67478        | -0.96746 |                |
| H     | -0.60318    | 2.13851        | 0.70399  |                |
| C     | 2.97083     | 1.37972        | -0.48324 |                |
| H     | 3.44571     | 0.94608        | 0.41392  |                |
| H     | 3.64777     | 1.22507        | -1.33707 |                |
| O     | 1.74010     | 0.77546        | -0.72449 |                |
| C     | 2.67669     | 2.86351        | -0.26353 |                |
| H     | 2.45779     | 3.34878        | -1.22573 |                |
| H     | 3.53340     | 3.37813        | 0.18664  |                |
| C     | 1.45765     | 2.93081        | 0.63865  |                |
| H     | 1.16404     | 3.98900        | 0.81625  |                |
| H     | 1.64725     | 2.49925        | 1.63115  |                |

## Intermediate 1A

|                                              |              |
|----------------------------------------------|--------------|
| Zero-point correction=                       | 0.232008     |
| (Hartree/Particle)                           |              |
| Thermal correction to Energy=                | 0.249255     |
| Thermal correction to Enthalpy=              | 0.250200     |
| Thermal correction to Gibbs Free Energy=     | 0.185897     |
| Sum of electronic and zero-point Energies=   | -1957.965141 |
| Sum of electronic and thermal Energies=      | -1957.947894 |
| Sum of electronic and thermal Enthalpies=    | -1957.946950 |
| Sum of electronic and thermal Free Energies= | -1958.011253 |

|       | E (Thermal) | CV             | S              |
|-------|-------------|----------------|----------------|
|       | KCal/Mol    | Cal/Mol-Kelvin | Cal/Mol-Kelvin |
| Total | 156.410     | 63.087         | 135.337        |
| C     | 2.77798     | 0.95150        | -0.22329       |
| C     | 1.96155     | 0.07572        | 0.48814        |
| C     | 2.37463     | -1.24377       | 0.69042        |
| C     | 3.58174     | -1.68539       | 0.16658        |
| C     | 4.39218     | -0.81735       | -0.56199       |
| C     | 3.98623     | 0.49842        | -0.74757       |
| H     | 2.48375     | 1.98539        | -0.38690       |
| H     | 1.73751     | -1.92647       | 1.25453        |
| H     | 3.89020     | -2.71612       | 0.33083        |
| H     | 5.33627     | -1.16518       | -0.97610       |
| H     | 4.61320     | 1.18971        | -1.30784       |
| C     | 0.50639     | 1.91040        | 1.31766        |
| H     | -0.26248    | 1.95798        | 2.09951        |
| H     | 1.44425     | 2.26214        | 1.77189        |
| C     | -2.28878    | 2.21961        | -0.42877       |
| H     | -2.11879    | 2.11001        | -1.51094       |
| H     | -3.34440    | 2.47235        | -0.26724       |
| O     | -2.05267    | 0.95953        | 0.17663        |
| C     | -1.35943    | 3.25889        | 0.16085        |
| H     | -1.67182    | 3.50015        | 1.18794        |
| H     | -1.48597    | 4.17824        | -0.42781       |
| C     | 0.10651     | 2.82553        | 0.15136        |
| H     | 0.73354     | 3.72604        | 0.20058        |
| H     | 0.33993     | 2.34864        | -0.81213       |
| Cl    | -1.21189    | -1.73639       | 1.90936        |
| Cl    | -0.01368    | -0.39615       | -1.91029       |
| Ti    | -1.23758    | -0.54989       | -0.04461       |
| Cl    | -2.86557    | -1.79061       | -0.97471       |
| N     | 0.67326     | 0.46580        | 1.00408        |
| H     | 0.55551     | -0.02998       | 1.88906        |



## TS 2A

|                                              |              |
|----------------------------------------------|--------------|
| Zero-point correction=                       | 0.226303     |
| (Hartree/Particle)                           |              |
| Thermal correction to Energy=                | 0.244346     |
| Thermal correction to Enthalpy=              | 0.245290     |
| Thermal correction to Gibbs Free Energy=     | 0.178036     |
| Sum of electronic and zero-point Energies=   | -1957.906442 |
| Sum of electronic and thermal Energies=      | -1957.888399 |
| Sum of electronic and thermal Enthalpies=    | -1957.887455 |
| Sum of electronic and thermal Free Energies= | -1957.954709 |

|       | E (Thermal) | CV             | S              |
|-------|-------------|----------------|----------------|
|       | KCal/Mol    | Cal/Mol-Kelvin | Cal/Mol-Kelvin |
| Total | 153.329     | 64.650         | 141.548        |
| C     | 3.78536     | 0.43879        | 0.39539        |
| C     | 2.56788     | -0.22694       | 0.20807        |
| C     | 2.57356     | -1.54354       | -0.28017       |
| C     | 3.77228     | -2.18286       | -0.55188       |
| C     | 4.98621     | -1.52307       | -0.35619       |
| C     | 4.98168     | -0.21571       | 0.11615        |
| H     | 3.80867     | 1.45590        | 0.78163        |
| H     | 1.62070     | -2.05403       | -0.43185       |
| H     | 3.76016     | -3.20762       | -0.91857       |
| H     | 5.92654     | -2.02702       | -0.56923       |
| H     | 5.92221     | 0.30853        | 0.27730        |
| C     | 1.19112     | 1.65773        | 1.09508        |
| H     | 0.18967     | 1.69024        | 1.54402        |
| H     | 1.92008     | 1.77606        | 1.91047        |
| C     | 0.54892     | 1.31824        | -1.80931       |
| H     | 1.52191     | 0.83491        | -1.89348       |
| H     | -0.17537    | 1.06442        | -2.57620       |
| O     | -1.01586    | -0.22003       | -1.09650       |
| C     | 0.36878     | 2.55441        | -1.06861       |
| H     | -0.68899    | 2.64701        | -0.76634       |
| H     | 0.48812     | 3.33239        | -1.85419       |
| C     | 1.32905     | 2.79170        | 0.07690        |
| H     | 1.12126     | 3.75545        | 0.55644        |
| H     | 2.35862     | 2.83695        | -0.30665       |
| Cl    | -2.72666    | 1.66947        | 0.73109        |
| Cl    | -1.33919    | -1.58398       | 1.67109        |
| Ti    | -2.24540    | -0.40458       | -0.03401       |

|    |          |          |          |
|----|----------|----------|----------|
| Cl | -3.98042 | -1.40980 | -1.04110 |
| N  | 1.33297  | 0.37636  | 0.43932  |
| H  | 0.57868  | -0.28582 | 0.60074  |

## Product A

|                                              |              |
|----------------------------------------------|--------------|
| Zero-point correction=                       | 0.232349     |
| (Hartree/Particle)                           |              |
| Thermal correction to Energy=                | 0.250096     |
| Thermal correction to Enthalpy=              | 0.251041     |
| Thermal correction to Gibbs Free Energy=     | 0.184190     |
| Sum of electronic and zero-point Energies=   | -1957.973381 |
| Sum of electronic and thermal Energies=      | -1957.955633 |
| Sum of electronic and thermal Enthalpies=    | -1957.954689 |
| Sum of electronic and thermal Free Energies= | -1958.021540 |

|       | E (Thermal) | CV             | S              |
|-------|-------------|----------------|----------------|
|       | KCal/Mol    | Cal/Mol-Kelvin | Cal/Mol-Kelvin |
| Total | 156.938     | 62.746         | 140.700        |
| C     | 3.76478     | 0.09938        | -0.24724       |
| C     | 2.46734     | -0.21765       | 0.13993        |
| C     | 2.09994     | -1.50918       | 0.48756        |
| C     | 3.06409     | -2.51271       | 0.44390        |
| C     | 4.36700     | -2.21582       | 0.05952        |
| C     | 4.71664     | -0.91160       | -0.28453       |
| H     | 4.03323     | 1.12083        | -0.51726       |
| H     | 1.07588     | -1.73168       | 0.78815        |
| H     | 2.78915     | -3.52995       | 0.71255        |
| H     | 5.11629     | -3.00367       | 0.02575        |
| H     | 5.73581     | -0.67810       | -0.58414       |
| C     | 1.76183     | 2.05495        | 1.04383        |
| H     | 1.00185     | 2.06067        | 1.83283        |
| H     | 2.74525     | 1.91067        | 1.49708        |
| C     | 1.06104     | 1.37175        | -1.20689       |
| H     | 1.96518     | 1.33221        | -1.82439       |
| H     | 0.30097     | 0.70484        | -1.62808       |
| O     | -2.30220    | 1.29887        | -0.81478       |
| C     | 0.62058     | 2.78970        | -0.92285       |
| H     | -0.40002    | 2.78808        | -0.51500       |
| H     | 0.62038     | 3.39858        | -1.83249       |
| C     | 1.63858     | 3.25082        | 0.11497        |
| H     | 1.32734     | 4.14680        | 0.66110        |
| H     | 2.60375     | 3.46799        | -0.36450       |

|    |          |          |          |
|----|----------|----------|----------|
| Cl | -4.61566 | -0.63125 | 0.27183  |
| Cl | -1.20058 | -0.03686 | 1.83353  |
| Ti | -2.44695 | -0.14525 | -0.12229 |
| Cl | -1.28712 | -1.60533 | -1.43339 |
| N  | 1.44706  | 0.83560  | 0.16899  |
| H  | 0.59234  | 0.41854  | 0.58140  |

## Complex B

|                                              |              |
|----------------------------------------------|--------------|
| Zero-point correction=                       | 0.215576     |
| (Hartree/Particle)                           |              |
| Thermal correction to Energy=                | 0.231256     |
| Thermal correction to Enthalpy=              | 0.232200     |
| Thermal correction to Gibbs Free Energy=     | 0.168776     |
| Sum of electronic and zero-point Energies=   | -1497.138823 |
| Sum of electronic and thermal Energies=      | -1497.123143 |
| Sum of electronic and thermal Enthalpies=    | -1497.122199 |
| Sum of electronic and thermal Free Energies= | -1497.185622 |

|       | E (Thermal) | CV             | S              |
|-------|-------------|----------------|----------------|
|       | KCal/Mol    | Cal/Mol-Kelvin | Cal/Mol-Kelvin |
| Total | 145.115     | 55.763         | 133.486        |
| C     | 2.74553     | 0.51061        | 1.11924        |
| C     | 2.15455     | -0.08757       | -0.00601       |
| C     | 2.90844     | -0.23410       | -1.18215       |
| C     | 4.22375     | 0.20826        | -1.22501       |
| C     | 4.80644     | 0.79923        | -0.10506       |
| C     | 4.06235     | 0.94746        | 1.06433        |
| H     | 2.15090     | 0.61298        | 2.02712        |
| H     | 2.44049     | -0.70180       | -2.04759       |
| H     | 4.80031     | 0.08994        | -2.14120       |
| H     | 5.83867     | 1.14222        | -0.14300       |
| H     | 4.51378     | 1.40627        | 1.94277        |
| N     | 0.84504     | -0.51256       | 0.04372        |
| C     | -3.10011    | 0.89774        | -0.36017       |
| H     | -3.48333    | 0.14814        | -1.06048       |
| H     | -3.48748    | 0.69854        | 0.64834        |
| Ti    | -0.74903    | -1.00437       | 0.14354        |
| C     | -0.99339    | 2.05246        | -0.28336       |
| H     | -0.26274    | 2.03310        | 0.53099        |
| H     | -0.47325    | 2.16735        | -1.24157       |

|    |          |          |          |
|----|----------|----------|----------|
| O  | -1.64925 | 0.74421  | -0.31524 |
| C  | -2.12929 | 3.03568  | -0.09649 |
| H  | -2.34239 | 3.17624  | 0.97142  |
| H  | -1.89619 | 4.01304  | -0.53061 |
| C  | -3.29833 | 2.33592  | -0.78404 |
| H  | -4.27454 | 2.72111  | -0.47335 |
| H  | -3.21981 | 2.42822  | -1.87516 |
| Cl | -1.24880 | -2.47529 | -1.51962 |
| Cl | -1.38806 | -1.23054 | 2.31979  |

## TS 1B

|                                              |              |
|----------------------------------------------|--------------|
| Zero-point correction=                       | 0.211353     |
| (Hartree/Particle)                           |              |
| Thermal correction to Energy=                | 0.227381     |
| Thermal correction to Enthalpy=              | 0.228325     |
| Thermal correction to Gibbs Free Energy=     | 0.165568     |
| Sum of electronic and zero-point Energies=   | -1497.082124 |
| Sum of electronic and thermal Energies=      | -1497.066097 |
| Sum of electronic and thermal Enthalpies=    | -1497.065153 |
| Sum of electronic and thermal Free Energies= | -1497.127910 |

|       | E (Thermal) | CV             | S              |
|-------|-------------|----------------|----------------|
|       | KCal/Mol    | Cal/Mol-Kelvin | Cal/Mol-Kelvin |
| Total | 142.684     | 58.248         | 132.083        |
| C     | -2.67737    | -0.28484       | 1.08354        |
| C     | -2.00513    | -0.27562       | -0.15677       |
| C     | -2.72082    | 0.08831        | -1.31586       |
| C     | -4.06763    | 0.40885        | -1.23372       |
| C     | -4.72454    | 0.38972        | -0.00297       |
| C     | -4.02342    | 0.04593        | 1.15204        |
| H     | -2.11566    | -0.56621       | 1.97472        |
| H     | -2.19476    | 0.09657        | -2.26993       |
| H     | -4.61319    | 0.67955        | -2.13639       |
| H     | -5.78112    | 0.64400        | 0.05525        |
| H     | -4.53240    | 0.03163        | 2.11453        |
| N     | -0.67350    | -0.56736       | -0.21932       |
| C     | 0.17990     | 1.89776        | 0.07644        |
| H     | -0.26655    | 1.94014        | -0.91606       |
| H     | -0.45805    | 1.52744        | 0.87821        |
| C     | 2.90724     | 1.38988        | -0.83387       |
| H     | 3.50873     | 1.07647        | 0.03696        |
| H     | 3.53979     | 1.32170        | -1.73081       |

|    |         |          |          |
|----|---------|----------|----------|
| Ti | 1.01335 | -0.83546 | -0.05632 |
| O  | 1.78986 | 0.57028  | -1.00135 |
| C  | 2.39639 | 2.81348  | -0.64826 |
| H  | 1.97445 | 3.17806  | -1.59538 |
| H  | 3.20537 | 3.49128  | -0.35228 |
| C  | 1.31379 | 2.75485  | 0.41519  |
| H  | 0.83517 | 3.75149  | 0.52809  |
| H  | 1.71421 | 2.49825  | 1.40551  |
| Cl | 1.59466 | -2.87474 | -0.85569 |
| Cl | 1.57096 | -0.49296 | 2.12499  |

## Intermediate 1B

|                                              |              |
|----------------------------------------------|--------------|
| Zero-point correction=                       | 0.216336     |
| (Hartree/Particle)                           |              |
| Thermal correction to Energy=                | 0.231088     |
| Thermal correction to Enthalpy=              | 0.232032     |
| Thermal correction to Gibbs Free Energy=     | 0.173291     |
| Sum of electronic and zero-point Energies=   | -1497.171405 |
| Sum of electronic and thermal Energies=      | -1497.156653 |
| Sum of electronic and thermal Enthalpies=    | -1497.155709 |
| Sum of electronic and thermal Free Energies= | -1497.214451 |

|       | E (Thermal) | CV             | S              |
|-------|-------------|----------------|----------------|
|       | KCal/Mol    | Cal/Mol-Kelvin | Cal/Mol-Kelvin |
| Total | 145.010     | 55.063         | 123.632        |
| C     | 2.03307     | -1.59961       | 0.33687        |
| C     | 1.46277     | -0.57370       | -0.43476       |
| C     | 2.27389     | 0.46780        | -0.89719       |
| C     | 3.62939     | 0.49472        | -0.57531       |
| C     | 4.18851     | -0.52179       | 0.18829        |
| C     | 3.38534     | -1.57263       | 0.63598        |
| H     | 1.40359     | -2.40753       | 0.71042        |
| H     | 1.83733     | 1.24128        | -1.52691       |
| H     | 4.24957     | 1.31162        | -0.94028       |
| H     | 5.24840     | -0.50331       | 0.43414        |
| H     | 3.81928     | -2.37199       | 1.23404        |
| C     | -0.54020    | -1.77023       | -1.26104       |
| H     | -0.99612    | -1.50597       | -2.22771       |
| H     | 0.27425     | -2.47302       | -1.48617       |
| C     | -3.29929    | -0.67624       | 0.28741        |
| H     | -3.14873    | -0.84805       | 1.36565        |
| H     | -4.33209    | -0.33651       | 0.13522        |

|    |          |          |          |
|----|----------|----------|----------|
| O  | -2.43522 | 0.37183  | -0.11275 |
| C  | -3.01652 | -1.93543 | -0.50323 |
| H  | -3.25796 | -1.76264 | -1.56364 |
| H  | -3.71965 | -2.70139 | -0.14358 |
| C  | -1.58601 | -2.46732 | -0.38283 |
| H  | -1.59519 | -3.52562 | -0.67901 |
| H  | -1.26156 | -2.44584 | 0.67061  |
| Cl | -0.38112 | 0.72447  | 2.30483  |
| Ti | -0.78285 | 0.88451  | 0.10798  |
| Cl | -0.41255 | 2.84673  | -0.94653 |
| N  | 0.07004  | -0.55553 | -0.70182 |

## TS 2B

|                                              |              |
|----------------------------------------------|--------------|
| Zero-point correction=                       | 0.212439     |
| (Hartree/Particle)                           |              |
| Thermal correction to Energy=                | 0.227958     |
| Thermal correction to Enthalpy=              | 0.228902     |
| Thermal correction to Gibbs Free Energy=     | 0.168630     |
| Sum of electronic and zero-point Energies=   | -1497.097027 |
| Sum of electronic and thermal Energies=      | -1497.081508 |
| Sum of electronic and thermal Enthalpies=    | -1497.080564 |
| Sum of electronic and thermal Free Energies= | -1497.140836 |

|       | E (Thermal) | CV             | S              |
|-------|-------------|----------------|----------------|
|       | KCal/Mol    | Cal/Mol-Kelvin | Cal/Mol-Kelvin |
| Total | 143.046     | 57.715         | 126.853        |
| C     | -2.68484    | 0.74688        | -0.82727       |
| C     | -1.60509    | -0.00918       | -0.33293       |
| C     | -1.90247    | -1.12712       | 0.47306        |
| C     | -3.21390    | -1.46003       | 0.77527        |
| C     | -4.27355    | -0.70110       | 0.28202        |
| C     | -3.99593    | 0.39690        | -0.52431       |
| H     | -2.51234    | 1.60702        | -1.46953       |
| H     | -1.09228    | -1.74288       | 0.86112        |
| H     | -3.40937    | -2.33068       | 1.39881        |
| H     | -5.30162    | -0.96624       | 0.51967        |
| H     | -4.80892    | 0.99920        | -0.92676       |
| C     | 0.02853     | 1.47295        | -1.39985       |
| H     | 1.06337     | 1.40370        | -1.76710       |
| H     | -0.61054    | 1.53285        | -2.29281       |
| C     | 0.32541     | 1.57604        | 1.67203        |
| H     | -0.70096    | 1.22033        | 1.75891        |

|    |          |          |          |
|----|----------|----------|----------|
| H  | 0.95591  | 1.44000  | 2.54564  |
| O  | 1.01115  | -0.61649 | 1.73119  |
| C  | 0.67207  | 2.64197  | 0.73623  |
| H  | 1.75892  | 2.69688  | 0.58487  |
| H  | 0.44625  | 3.52558  | 1.37998  |
| C  | -0.12131 | 2.74614  | -0.54916 |
| H  | 0.21586  | 3.61779  | -1.12299 |
| H  | -1.18147 | 2.90626  | -0.30973 |
| Cl | 3.29031  | 0.51654  | -0.22439 |
| Ti | 1.33422  | -0.60109 | 0.11472  |
| Cl | 1.42950  | -2.72068 | -0.66103 |
| N  | -0.26788 | 0.28797  | -0.61598 |

## Product B

|                                              |              |
|----------------------------------------------|--------------|
| Zero-point correction=                       | 0.217825     |
| (Hartree/Particle)                           |              |
| Thermal correction to Energy=                | 0.233394     |
| Thermal correction to Enthalpy=              | 0.234338     |
| Thermal correction to Gibbs Free Energy=     | 0.173749     |
| Sum of electronic and zero-point Energies=   | -1497.180461 |
| Sum of electronic and thermal Energies=      | -1497.164892 |
| Sum of electronic and thermal Enthalpies=    | -1497.163948 |
| Sum of electronic and thermal Free Energies= | -1497.224537 |

|       | E (Thermal) | CV             | S              |
|-------|-------------|----------------|----------------|
|       | KCal/Mol    | Cal/Mol-Kelvin | Cal/Mol-Kelvin |
| Total | 146.457     | 56.765         | 127.520        |
| C     | 1.59430     | -0.96357       | -1.32955       |
| C     | 0.94451     | -1.05915       | -0.08968       |
| C     | 1.69750     | -1.00487       | 1.09308        |
| C     | 3.07915     | -0.86135       | 1.02673        |
| C     | 3.72003     | -0.76624       | -0.20323       |
| C     | 2.97336     | -0.81875       | -1.37720       |
| H     | 1.02693     | -0.98963       | -2.25621       |
| H     | 1.21161     | -1.07536       | 2.06252        |
| H     | 3.65356     | -0.82508       | 1.94941        |
| H     | 4.80046     | -0.65069       | -0.24955       |
| H     | 3.46548     | -0.74148       | -2.34417       |
| C     | -1.21792    | -1.52856       | -1.24564       |
| H     | -1.17849    | -0.74690       | -2.01387       |
| H     | -0.70672    | -2.42340       | -1.63263       |
| C     | -1.09506    | -1.92023       | 1.07022        |

|    |          |          |          |
|----|----------|----------|----------|
| H  | -0.68832 | -2.94033 | 0.97442  |
| H  | -0.84278 | -1.51764 | 2.05347  |
| O  | -0.67638 | 1.06129  | 1.92796  |
| C  | -2.57578 | -1.85813 | 0.75630  |
| H  | -2.99477 | -0.93008 | 1.16774  |
| H  | -3.11783 | -2.69676 | 1.20475  |
| C  | -2.64164 | -1.84561 | -0.77975 |
| H  | -3.34935 | -1.09146 | -1.13950 |
| H  | -2.95629 | -2.81478 | -1.18199 |
| Cl | -2.34394 | 1.68955  | -0.69914 |
| Ti | -0.43756 | 1.05503  | 0.34260  |
| Cl | 1.24403  | 2.49385  | -0.18224 |
| N  | -0.49404 | -1.08805 | -0.01419 |

## Complex C

|                                              |              |
|----------------------------------------------|--------------|
| Zero-point correction=                       | 0.334809     |
| (Hartree/Particle)                           |              |
| Thermal correction to Energy=                | 0.357045     |
| Thermal correction to Enthalpy=              | 0.357989     |
| Thermal correction to Gibbs Free Energy=     | 0.279188     |
| Sum of electronic and zero-point Energies=   | -1729.357365 |
| Sum of electronic and thermal Energies=      | -1729.335129 |
| Sum of electronic and thermal Enthalpies=    | -1729.334185 |
| Sum of electronic and thermal Free Energies= | -1729.412986 |

|       | E (Thermal) | CV             | S              |
|-------|-------------|----------------|----------------|
|       | KCal/Mol    | Cal/Mol-Kelvin | Cal/Mol-Kelvin |
| Total | 224.049     | 79.850         | 165.851        |
| C     | 2.88538     | -0.31634       | -0.96684       |
| C     | 2.30710     | -0.21469       | 0.31181        |
| C     | 3.14378     | -0.23648       | 1.44076        |
| C     | 4.51905     | -0.35463       | 1.28780        |
| C     | 5.08469     | -0.45374       | 0.01804        |
| C     | 4.26189     | -0.43498       | -1.10640       |
| H     | 2.22872     | -0.29922       | -1.83740       |
| H     | 2.69045     | -0.16095       | 2.42766        |
| H     | 5.15621     | -0.36889       | 2.17036        |
| H     | 6.16340     | -0.54590       | -0.09445       |
| H     | 4.69733     | -0.51112       | -2.10154       |
| N     | 0.94300     | -0.09882       | 0.43909        |
| C     | 0.35270     | 2.86362        | -0.49225       |
| H     | 1.09633     | 3.18841        | 0.24689        |



|    |          |          |          |
|----|----------|----------|----------|
| H  | 0.81547  | 2.15403  | -1.18545 |
| C  | -1.91929 | 2.94443  | 0.22781  |
| H  | -2.60241 | 2.48606  | -0.50395 |
| H  | -2.35544 | 2.87387  | 1.22915  |
| C  | -2.46004 | -2.52736 | 0.16992  |
| H  | -2.92234 | -2.31460 | 1.13891  |
| H  | -3.00937 | -2.00005 | -0.62483 |
| Ti | -0.72069 | 0.06550  | 0.31365  |
| C  | -0.19461 | -2.88372 | -0.47907 |
| H  | 0.37209  | -2.29176 | -1.20503 |
| H  | 0.49248  | -3.28347 | 0.27787  |
| O  | -1.11391 | -1.99249 | 0.21334  |
| C  | -1.07936 | -3.94192 | -1.10675 |
| H  | -1.41061 | -3.61494 | -2.10247 |
| H  | -0.56097 | -4.90044 | -1.21507 |
| C  | -2.26557 | -3.99300 | -0.15032 |
| H  | -3.16157 | -4.44279 | -0.59042 |
| H  | -2.00729 | -4.55189 | 0.75942  |
| O  | -0.69534 | 2.16664  | 0.23798  |
| C  | -1.48185 | 4.33025  | -0.19357 |
| H  | -1.09969 | 4.89145  | 0.67014  |
| H  | -2.30133 | 4.90188  | -0.64111 |
| C  | -0.35564 | 4.01614  | -1.17209 |
| H  | 0.31514  | 4.86159  | -1.35656 |
| H  | -0.77057 | 3.68533  | -2.13461 |
| Cl | -1.87912 | 0.17018  | 2.32744  |
| Cl | -1.34953 | 0.14250  | -1.95361 |

## TS 1C

|                                              |              |
|----------------------------------------------|--------------|
| Zero-point correction=                       | 0.329809     |
| (Hartree/Particle)                           |              |
| Thermal correction to Energy=                | 0.351701     |
| Thermal correction to Enthalpy=              | 0.352645     |
| Thermal correction to Gibbs Free Energy=     | 0.276812     |
| Sum of electronic and zero-point Energies=   | -1729.286829 |
| Sum of electronic and thermal Energies=      | -1729.264938 |
| Sum of electronic and thermal Enthalpies=    | -1729.263994 |
| Sum of electronic and thermal Free Energies= | -1729.339827 |

|       | E (Thermal) | CV             | S              |
|-------|-------------|----------------|----------------|
|       | KCal/Mol    | Cal/Mol-Kelvin | Cal/Mol-Kelvin |
| Total | 220.695     | 80.706         | 159.604        |

|    |          |          |          |
|----|----------|----------|----------|
| C  | 2.40838  | -1.75454 | -1.10782 |
| C  | 2.01192  | -1.05260 | 0.04890  |
| C  | 2.88871  | -1.01740 | 1.15473  |
| C  | 4.10326  | -1.68434 | 1.10509  |
| C  | 4.48238  | -2.38180 | -0.04279 |
| C  | 3.63262  | -2.40942 | -1.14679 |
| H  | 1.73001  | -1.77980 | -1.96133 |
| H  | 2.57452  | -0.46936 | 2.04353  |
| H  | 4.76449  | -1.66072 | 1.97013  |
| H  | 5.43822  | -2.90131 | -0.07547 |
| H  | 3.92421  | -2.95205 | -2.04492 |
| N  | 0.81942  | -0.39323 | 0.09253  |
| C  | 1.61466  | 1.71497  | -1.03764 |
| H  | 2.31147  | 1.58947  | -0.21041 |
| H  | 1.53646  | 0.88789  | -1.74037 |
| C  | -0.19493 | 3.54808  | 0.39789  |
| H  | -1.11639 | 3.62833  | -0.20548 |
| H  | -0.33102 | 4.14412  | 1.31412  |
| C  | -3.29436 | -1.22298 | 0.46910  |
| H  | -3.37144 | -1.15206 | 1.55807  |
| H  | -3.74902 | -0.33034 | 0.01039  |
| Ti | -0.60872 | 0.49587  | 0.45836  |
| C  | -1.64313 | -2.12761 | -0.97359 |
| H  | -1.09865 | -1.57321 | -1.74502 |
| H  | -1.01215 | -2.94524 | -0.59982 |
| O  | -1.88777 | -1.23623 | 0.14209  |
| C  | -3.01690 | -2.59195 | -1.42118 |
| H  | -3.42016 | -1.89734 | -2.17150 |
| H  | -2.99307 | -3.59586 | -1.85822 |
| C  | -3.83108 | -2.50149 | -0.13564 |
| H  | -4.91200 | -2.45956 | -0.30562 |
| H  | -3.61518 | -3.35480 | 0.52170  |
| O  | 0.05762  | 2.22837  | 0.73276  |
| C  | 1.00115  | 4.06391  | -0.39334 |
| H  | 1.87658  | 4.13500  | 0.26816  |
| H  | 0.80707  | 5.05963  | -0.80990 |
| C  | 1.26879  | 3.05661  | -1.49640 |
| H  | 2.19286  | 3.33384  | -2.05172 |
| H  | 0.46525  | 3.02568  | -2.24397 |
| Cl | -1.11723 | 0.14896  | 2.70492  |
| Cl | -1.72358 | 1.22383  | -1.52350 |

## Intermediate 1C

|                                              |              |
|----------------------------------------------|--------------|
| Zero-point correction=                       | 0.335522     |
| (Hartree/Particle)                           |              |
| Thermal correction to Energy=                | 0.356687     |
| Thermal correction to Enthalpy=              | 0.357631     |
| Thermal correction to Gibbs Free Energy=     | 0.284659     |
| Sum of electronic and zero-point Energies=   | -1729.373460 |
| Sum of electronic and thermal Energies=      | -1729.352294 |
| Sum of electronic and thermal Enthalpies=    | -1729.351350 |
| Sum of electronic and thermal Free Energies= | -1729.424323 |

|       | E (Thermal) | CV             | S              |
|-------|-------------|----------------|----------------|
|       | KCal/Mol    | Cal/Mol-Kelvin | Cal/Mol-Kelvin |
| Total | 223.825     | 79.176         | 153.584        |
| C     | 1.35039     | 2.38473        | -1.00666       |
| C     | 0.81008     | 1.73726        | 0.11365        |
| C     | 1.59249     | 1.60582        | 1.26368        |
| C     | 2.89619     | 2.09372        | 1.28580        |
| C     | 3.42851     | 2.73262        | 0.17017        |
| C     | 2.64703     | 2.88051        | -0.97511       |
| H     | 0.74637     | 2.47381        | -1.91061       |
| H     | 1.16826     | 1.11042        | 2.13637        |
| H     | 3.49342     | 1.98301        | 2.18940        |
| H     | 4.44589     | 3.11868        | 0.19241        |
| H     | 3.05462     | 3.37619        | -1.85482       |
| N     | -0.51607    | 1.22155        | 0.06792        |
| C     | -1.54382    | 2.25569        | -0.17140       |
| H     | -1.95281    | 2.56778        | 0.80519        |
| H     | -1.02310    | 3.13451        | -0.57511       |
| C     | -3.79928    | -0.14911       | -0.08149       |
| H     | -3.75870    | -0.78131       | -0.98525       |
| H     | -4.64028    | -0.48721       | 0.54006        |
| C     | 1.62254     | -2.53728       | 0.44719        |
| H     | 1.82104     | -2.46615       | 1.51982        |
| H     | 0.79222     | -3.23935       | 0.27803        |
| Ti    | -0.87726    | -0.59010       | 0.43396        |
| C     | 1.88001     | -0.90147       | -1.25127       |
| H     | 1.14450     | -0.47408       | -1.94088       |
| H     | 2.64610     | -0.14880       | -1.02000       |
| O     | 1.19864     | -1.22433       | -0.00937       |
| C     | 2.48008     | -2.20745       | -1.72325       |
| H     | 1.72771     | -2.79294       | -2.26934       |
| H     | 3.34419     | -2.05149       | -2.37765       |
| C     | 2.82554     | -2.88443       | -0.40340       |

|    |          |          |          |
|----|----------|----------|----------|
| H  | 2.96615  | -3.96700 | -0.48915 |
| H  | 3.73958  | -2.45088 | 0.02524  |
| O  | -2.60447 | -0.34585 | 0.62690  |
| C  | -3.94025 | 1.31269  | -0.45470 |
| H  | -4.18140 | 1.90091  | 0.44459  |
| H  | -4.80342 | 1.40386  | -1.12981 |
| C  | -2.69543 | 1.89997  | -1.11742 |
| H  | -2.99302 | 2.83339  | -1.61545 |
| H  | -2.32654 | 1.23386  | -1.91412 |
| Cl | -0.40391 | -1.16155 | 2.60176  |
| Cl | -1.27705 | -1.81634 | -1.51861 |

## TS 2C

|                                              |              |
|----------------------------------------------|--------------|
| Zero-point correction=                       | 0.331866     |
| (Hartree/Particle)                           |              |
| Thermal correction to Energy=                | 0.352706     |
| Thermal correction to Enthalpy=              | 0.353650     |
| Thermal correction to Gibbs Free Energy=     | 0.283194     |
| Sum of electronic and zero-point Energies=   | -1729.293328 |
| Sum of electronic and thermal Energies=      | -1729.272488 |
| Sum of electronic and thermal Enthalpies=    | -1729.271544 |
| Sum of electronic and thermal Free Energies= | -1729.342000 |

|       | E (Thermal) | CV             | S              |
|-------|-------------|----------------|----------------|
|       | KCal/Mol    | Cal/Mol-Kelvin | Cal/Mol-Kelvin |
| Total | 221.326     | 79.714         | 148.286        |
| C     | 1.98457     | -1.92679       | -1.22992       |
| C     | 1.12096     | -1.32996       | -0.29153       |
| C     | 1.66630     | -1.03099       | 0.97139        |
| C     | 2.99263     | -1.31204       | 1.27711        |
| C     | 3.83032     | -1.90284       | 0.33563        |
| C     | 3.31135     | -2.20351       | -0.92003       |
| H     | 1.62757     | -2.15088       | -2.23338       |
| H     | 1.03926     | -0.54544       | 1.71727        |
| H     | 3.37096     | -1.06433       | 2.26866        |
| H     | 4.86886     | -2.12318       | 0.57475        |
| H     | 3.94839     | -2.65492       | -1.67975       |
| C     | -0.90568    | -2.03243       | -1.38416       |
| H     | -1.82854    | -1.62198       | -1.80397       |
| H     | -0.31222    | -2.39378       | -2.23545       |
| C     | -1.49784    | -1.91588       | 1.71089        |
| H     | -0.44024    | -1.99385       | 1.95903        |

|    |          |          |          |
|----|----------|----------|----------|
| H  | -2.15273 | -1.52723 | 2.48571  |
| O  | -1.17199 | 0.30871  | 1.74346  |
| C  | -2.07102 | -2.80362 | 0.71150  |
| H  | -3.08912 | -2.50278 | 0.43785  |
| H  | -2.20866 | -3.68157 | 1.39303  |
| C  | -1.22635 | -3.22442 | -0.47366 |
| H  | -1.75680 | -4.00129 | -1.03922 |
| H  | -0.28185 | -3.66601 | -0.12074 |
| Cl | -3.36575 | -0.03751 | -0.50818 |
| Ti | -1.21528 | 0.60773  | 0.11425  |
| Cl | -1.79064 | 2.85706  | -0.36519 |
| N  | -0.21425 | -1.00173 | -0.62248 |
| C  | 1.25525  | 2.33145  | 1.10724  |
| H  | 0.41265  | 2.85311  | 1.57387  |
| H  | 1.72486  | 1.66234  | 1.84135  |
| C  | 1.38486  | 1.81849  | -1.20404 |
| H  | 1.47313  | 0.89112  | -1.77980 |
| H  | 0.74778  | 2.53352  | -1.74684 |
| O  | 0.74040  | 1.49176  | 0.04428  |
| C  | 2.69691  | 2.43320  | -0.77550 |
| H  | 3.40111  | 1.64262  | -0.47701 |
| H  | 3.15876  | 3.03378  | -1.56590 |
| C  | 2.25776  | 3.25216  | 0.43390  |
| H  | 3.08075  | 3.52370  | 1.10321  |
| H  | 1.76345  | 4.17625  | 0.10353  |

## Product C

|                                              |              |
|----------------------------------------------|--------------|
| Zero-point correction=                       | 0.336190     |
| (Hartree/Particle)                           |              |
| Thermal correction to Energy=                | 0.356944     |
| Thermal correction to Enthalpy=              | 0.357889     |
| Thermal correction to Gibbs Free Energy=     | 0.285227     |
| Sum of electronic and zero-point Energies=   | -1729.367508 |
| Sum of electronic and thermal Energies=      | -1729.346754 |
| Sum of electronic and thermal Enthalpies=    | -1729.345810 |
| Sum of electronic and thermal Free Energies= | -1729.418471 |

|       | E (Thermal) | CV             | S              |
|-------|-------------|----------------|----------------|
|       | KCal/Mol    | Cal/Mol-Kelvin | Cal/Mol-Kelvin |
| Total | 223.986     | 77.055         | 152.929        |
| C     | 0.06047     | 2.33167        | 1.14010        |
| C     | 0.45658     | 1.67784        | -0.02851       |

|    |          |          |          |
|----|----------|----------|----------|
| C  | -0.19958 | 1.97995  | -1.22650 |
| C  | -1.17729 | 2.96509  | -1.26429 |
| C  | -1.52898 | 3.65878  | -0.10880 |
| C  | -0.91613 | 3.32406  | 1.09175  |
| H  | 0.49871  | 2.07699  | 2.10182  |
| H  | 0.03461  | 1.42813  | -2.13562 |
| H  | -1.66627 | 3.18966  | -2.21075 |
| H  | -2.28464 | 4.44061  | -0.14442 |
| H  | -1.19523 | 3.83492  | 2.01141  |
| N  | 1.50313  | 0.66771  | -0.00909 |
| C  | 2.40865  | 0.69362  | -1.23533 |
| H  | 2.35700  | -0.27836 | -1.73969 |
| H  | 2.05874  | 1.45901  | -1.93135 |
| C  | 2.42472  | 0.76188  | 1.18867  |
| H  | 2.43180  | 1.80391  | 1.53397  |
| H  | 2.05604  | 0.13039  | 2.00699  |
| C  | -2.60423 | -0.51848 | -1.21699 |
| H  | -2.59949 | 0.45066  | -1.74321 |
| H  | -2.25348 | -1.29160 | -1.90286 |
| Ti | 0.63634  | -1.38667 | 0.05634  |
| C  | -2.42016 | 0.09361  | 0.96177  |
| H  | -1.83055 | -0.01839 | 1.87530  |
| H  | -2.60020 | 1.16544  | 0.77118  |
| O  | -1.66690 | -0.44756 | -0.13062 |
| C  | -3.70672 | -0.70216 | 0.92551  |
| H  | -3.53126 | -1.69391 | 1.36315  |
| H  | -4.52196 | -0.22122 | 1.47720  |
| C  | -3.97345 | -0.80655 | -0.58243 |
| H  | -4.35553 | -1.79374 | -0.86401 |
| H  | -4.71089 | -0.06315 | -0.90866 |
| O  | 2.10091  | -2.02935 | 0.16729  |
| C  | 3.80183  | 0.38319  | 0.68479  |
| H  | 3.91513  | -0.70472 | 0.64532  |
| H  | 4.58180  | 0.79507  | 1.33464  |
| C  | 3.80636  | 0.98253  | -0.71234 |
| H  | 4.57693  | 0.56302  | -1.36781 |
| H  | 3.96514  | 2.06918  | -0.65752 |
| Cl | 0.10013  | -2.22073 | -2.02268 |
| Cl | -0.18909 | -2.05244 | 2.09981  |

## Complex D

Zero-point correction=  
(Hartree/Particle)

0.244498

|                                              |              |
|----------------------------------------------|--------------|
| Thermal correction to Energy=                | 0.264411     |
| Thermal correction to Enthalpy=              | 0.265355     |
| Thermal correction to Gibbs Free Energy=     | 0.194420     |
| Sum of electronic and zero-point Energies=   | -2418.744019 |
| Sum of electronic and thermal Energies=      | -2418.724105 |
| Sum of electronic and thermal Enthalpies=    | -2418.723161 |
| Sum of electronic and thermal Free Energies= | -2418.794096 |

|       | E (Thermal) |          | CV             |  | S              |
|-------|-------------|----------|----------------|--|----------------|
|       | KCal/Mol    |          | Cal/Mol-Kelvin |  | Cal/Mol-Kelvin |
| Total | 165.920     |          | 70.728         |  | 149.295        |
| C     | -3.24180    | -0.64481 | 0.51428        |  |                |
| C     | -2.28691    | 0.34122  | 0.74807        |  |                |
| C     | -2.57682    | 1.67645  | 0.48571        |  |                |
| C     | -3.82314    | 2.02577  | -0.02262       |  |                |
| C     | -4.78087    | 1.04605  | -0.26465       |  |                |
| C     | -4.48621    | -0.28702 | 0.00916        |  |                |
| H     | -3.00526    | -1.68856 | 0.71890        |  |                |
| H     | -1.82781    | 2.44529  | 0.67697        |  |                |
| H     | -4.04490    | 3.07155  | -0.22684       |  |                |
| H     | -5.75574    | 1.32041  | -0.66227       |  |                |
| H     | -5.23139    | -1.05952 | -0.17063       |  |                |
| C     | 2.96416     | 1.28397  | 0.45490        |  |                |
| H     | 3.14867     | 0.76899  | 1.40208        |  |                |
| H     | 3.54284     | 0.79624  | -0.33934       |  |                |
| C     | 0.97134     | 2.39796  | -0.19603       |  |                |
| H     | 0.26399     | 2.25796  | -1.01803       |  |                |
| H     | 0.43472     | 2.75783  | 0.69658        |  |                |
| O     | 1.55162     | 1.10647  | 0.12074        |  |                |
| C     | 2.15390     | 3.28283  | -0.51120       |  |                |
| H     | 2.49611     | 3.10401  | -1.53948       |  |                |
| H     | 1.91368     | 4.34572  | -0.40450       |  |                |
| C     | 3.18118     | 2.78203  | 0.49438        |  |                |
| H     | 4.21222     | 3.04679  | 0.23811        |  |                |
| H     | 2.96386     | 3.18156  | 1.49441        |  |                |
| Cl    | 2.48593     | -1.53856 | -1.26107       |  |                |
| Cl    | -0.46617    | -0.01690 | -1.85751       |  |                |
| Ti    | 0.67664     | -0.90634 | -0.11826       |  |                |
| Cl    | -0.44105    | -2.83553 | -0.14327       |  |                |
| Cl    | 1.57707     | -1.27975 | 1.98066        |  |                |
| N     | -0.98580    | -0.03473 | 1.23295        |  |                |
| H     | -0.53881    | 0.74224  | 1.72388        |  |                |
| H     | -1.06780    | -0.78383 | 1.92371        |  |                |

## TS 1D

|                                              |              |
|----------------------------------------------|--------------|
| Zero-point correction=<br>(Hartree/Particle) | 0.241759     |
| Thermal correction to Energy=                | 0.261652     |
| Thermal correction to Enthalpy=              | 0.262596     |
| Thermal correction to Gibbs Free Energy=     | 0.191253     |
| Sum of electronic and zero-point Energies=   | -2418.683458 |
| Sum of electronic and thermal Energies=      | -2418.657565 |
| Sum of electronic and thermal Enthalpies=    | -2418.656621 |
| Sum of electronic and thermal Free Energies= | -2418.727963 |

|       | E (Thermal)<br>KCal/Mol | CV<br>Cal/Mol-Kelvin | S<br>Cal/Mol-Kelvin |
|-------|-------------------------|----------------------|---------------------|
| Total | 164.189                 | 70.700               | 150.153             |
| C     | -0.59627                | 1.80561              | -0.00113            |
| H     | -0.73665                | 1.14598              | 0.84922             |
| H     | -0.8834                 | 1.40249              | -0.97006            |
| C     | 2.04145                 | 2.31067              | -0.24876            |
| H     | 2.46041                 | 2.46219              | 0.75756             |
| H     | 2.86772                 | 2.14833              | -0.95217            |
| O     | 1.21182                 | 1.15239              | -0.22507            |
| C     | 1.11802                 | 3.43307              | -0.65896            |
| H     | 0.89918                 | 3.36632              | -1.73367            |
| H     | 1.55873                 | 4.41702              | -0.46278            |
| C     | -0.16674                | 3.22925              | 0.14536             |
| H     | -0.95056                | 3.89437              | -0.23409            |
| H     | -0.00193                | 3.46774              | 1.20418             |
| C     | -3.29176                | -0.09581             | 1.30502             |
| C     | -3.32553                | 0.74639              | 0.19342             |
| C     | -3.77814                | 0.26698              | -1.03549            |
| C     | -4.1976                 | -1.05349             | -1.14723            |
| C     | -4.16603                | -1.89931             | -0.04177            |
| C     | -3.71005                | -1.41587             | 1.18143             |
| H     | -2.92959                | 0.28197              | 2.26227             |
| H     | -3.79104                | 0.92636              | -1.90412            |
| H     | -4.55005                | -1.42364             | -2.10806            |
| H     | -4.49114                | -2.93319             | -0.1342             |
| H     | -3.67837                | -2.06952             | 2.05092             |
| Cl    | 3.12056                 | -1.58902             | -1.40855            |
| Cl    | -0.09771                | -1.15658             | -1.50787            |
| Ti    | 1.61602                 | -0.66435             | -0.02835            |



|    |          |          |         |
|----|----------|----------|---------|
| Cl | 0.44581  | -1.60378 | 1.65052 |
| Cl | 3.30162  | -0.07644 | 1.43213 |
| N  | -2.79625 | 2.05978  | 0.28991 |
| H  | -3.17252 | 2.68909  | -0.4169 |
| H  | -2.93271 | 2.4766   | 1.20937 |

## Intermediate 1D

|                                              |              |
|----------------------------------------------|--------------|
| Zero-point correction=                       | 0.244711     |
| (Hartree/Particle)                           |              |
| Thermal correction to Energy=                | 0.264670     |
| Thermal correction to Enthalpy=              | 0.265614     |
| Thermal correction to Gibbs Free Energy=     | 0.193777     |
| Sum of electronic and zero-point Energies=   | -2418.747224 |
| Sum of electronic and thermal Energies=      | -2418.727265 |
| Sum of electronic and thermal Enthalpies=    | -2418.726321 |
| Sum of electronic and thermal Free Energies= | -2418.798158 |

|       | E (Thermal) | CV             | S              |
|-------|-------------|----------------|----------------|
|       | KCal/Mol    | Cal/Mol-Kelvin | Cal/Mol-Kelvin |
| Total | 166.083     | 70.154         | 151.194        |

|   |          |          |          |
|---|----------|----------|----------|
| C | -1.31798 | 1.8062   | 0.69726  |
| H | -2.20473 | 1.90459  | 1.33165  |
| H | -0.57499 | 1.21043  | 1.23956  |
| C | 1.57555  | 2.43561  | -0.26    |
| H | 1.82249  | 2.59849  | 0.80259  |
| H | 2.45806  | 2.7063   | -0.85576 |
| O | 1.31344  | 1.06306  | -0.45716 |
| C | 0.36497  | 3.24372  | -0.68076 |
| H | 0.07312  | 2.92439  | -1.69364 |
| H | 0.66382  | 4.29642  | -0.77603 |
| C | -0.81239 | 3.17744  | 0.28973  |
| H | -1.65274 | 3.75932  | -0.11915 |
| H | -0.5322  | 3.67861  | 1.22796  |
| C | -4.1722  | 0.57235  | -0.69699 |
| C | -2.94142 | 0.13655  | -0.22862 |
| C | -2.79542 | -1.02407 | 0.51808  |
| C | -3.93392 | -1.77527 | 0.7915   |
| C | -5.17991 | -1.36217 | 0.32725  |
| C | -5.30023 | -0.1909  | -0.41472 |
| H | -4.25334 | 1.49158  | -1.27674 |

|    |          |          |          |
|----|----------|----------|----------|
| H  | -1.81257 | -1.33951 | 0.86968  |
| H  | -3.84135 | -2.69259 | 1.36812  |
| H  | -6.0636  | -1.95798 | 0.54532  |
| H  | -6.27255 | 0.13282  | -0.77897 |
| Cl | 3.37326  | -1.43334 | -1.46362 |
| Cl | 0.11508  | -1.5084  | -1.34681 |
| Ti | 1.88834  | -0.54198 | -0.01869 |
| Cl | 0.73602  | -1.22555 | 1.84484  |
| Cl | 3.56423  | 0.28166  | 1.29864  |
| N  | -1.75308 | 0.9621   | -0.49231 |
| H  | -0.9708  | 0.33482  | -0.79621 |
| H  | -1.94631 | 1.57561  | -1.29205 |

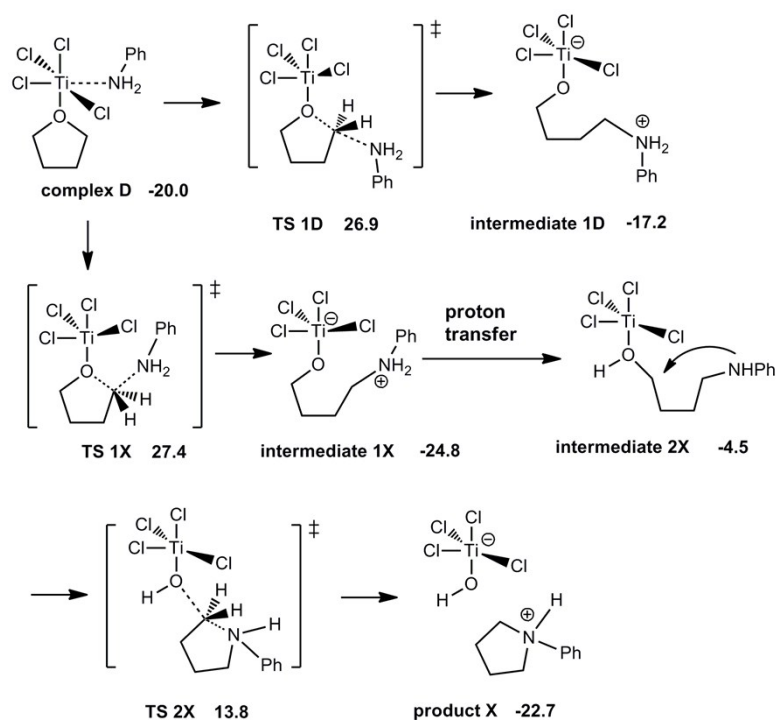

## TS 1X

|                                              |              |
|----------------------------------------------|--------------|
| Zero-point correction=                       | 0.238038     |
| (Hartree/Particle)                           |              |
| Thermal correction to Energy=                | 0.258661     |
| Thermal correction to Enthalpy=              | 0.259605     |
| Thermal correction to Gibbs Free Energy=     | 0.185274     |
| Sum of electronic and zero-point Energies=   | -2418.674335 |
| Sum of electronic and thermal Energies=      | -2418.653712 |
| Sum of electronic and thermal Enthalpies=    | -2418.652968 |
| Sum of electronic and thermal Free Energies= | -2418.727098 |

|       | E (Thermal) |          | CV             | S              |
|-------|-------------|----------|----------------|----------------|
|       | KCal/Mol    |          | Cal/Mol-Kelvin | Cal/Mol-Kelvin |
| Total | 162.312     |          | 72.885         | 156.442        |
| C     | -1.05234    | 1.65384  | 0.26894        |                |
| H     | -1.77952    | 1.63723  | -0.53990       |                |
| H     | -1.13833    | 0.87516  | 1.02891        |                |
| C     | 1.62015     | 2.19074  | -1.03102       |                |
| H     | 2.44747     | 2.40352  | -0.33776       |                |
| H     | 2.00682     | 2.19796  | -2.05908       |                |
| O     | 1.10157     | 0.90525  | -0.75191       |                |
| C     | 0.50569     | 3.20901  | -0.84792       |                |
| H     | -0.18851    | 3.18995  | -1.69934       |                |
| H     | 0.92147     | 4.21978  | -0.77342       |                |
| C     | -0.23185    | 2.83339  | 0.44234        |                |
| H     | -0.98169    | 3.62610  | 0.65385        |                |
| H     | 0.44607     | 2.75816  | 1.30070        |                |
| C     | -4.00934    | 0.15924  | -1.27458       |                |
| C     | -3.03726    | -0.50392 | -0.50857       |                |
| C     | -3.36359    | -0.93747 | 0.78711        |                |
| C     | -4.64567    | -0.74408 | 1.28195        |                |
| C     | -5.61549    | -0.10460 | 0.51190        |                |
| C     | -5.28761    | 0.34564  | -0.76553       |                |
| H     | -3.75646    | 0.50275  | -2.27849       |                |
| H     | -2.60559    | -1.44436 | 1.38542        |                |
| H     | -4.88932    | -1.09858 | 2.28181        |                |
| H     | -6.61900    | 0.04240  | 0.90521        |                |
| H     | -6.03698    | 0.84701  | -1.37550       |                |
| Cl    | 3.96740     | -0.67225 | -0.68128       |                |
| Cl    | 1.18278     | -2.10793 | -1.45400       |                |
| Ti    | 1.85760     | -0.50214 | 0.07676        |                |
| Cl    | 0.35130     | -1.43361 | 1.57602        |                |
| Cl    | 2.62460     | 0.78953  | 1.85269        |                |
| N     | -1.74075    | -0.63046 | -0.97477       |                |
| H     | -1.15732    | -1.34212 | -0.53887       |                |
| H     | -1.60301    | -0.59477 | -1.97972       |                |

## Intermediate 1X

|                                          |          |
|------------------------------------------|----------|
| Zero-point correction=                   | 0.244896 |
| (Hartree/Particle)                       |          |
| Thermal correction to Energy=            | 0.264735 |
| Thermal correction to Enthalpy=          | 0.265679 |
| Thermal correction to Gibbs Free Energy= | 0.194081 |

|                                              |              |
|----------------------------------------------|--------------|
| Sum of electronic and zero-point Energies=   | -2418.750803 |
| Sum of electronic and thermal Energies=      | -2418.730964 |
| Sum of electronic and thermal Enthalpies=    | -2418.730020 |
| Sum of electronic and thermal Free Energies= | -2418.801618 |

|       | E (Thermal) | CV             | S              |
|-------|-------------|----------------|----------------|
|       | KCal/Mol    | Cal/Mol-Kelvin | Cal/Mol-Kelvin |
| Total | 166.123     | 70.015         | 150.691        |
| C     | -1.59348    | 2.32794        | 0.27762        |
| H     | -2.27474    | 2.69925        | -0.49830       |
| H     | -2.08725    | 2.44217        | 1.24966        |
| C     | 1.64151     | 2.10550        | -1.20581       |
| H     | 2.41593     | 2.41943        | -0.48797       |
| H     | 2.08154     | 2.10815        | -2.21196       |
| O     | 1.26942     | 0.77753        | -0.89234       |
| C     | 0.43697     | 3.02325        | -1.13686       |
| H     | -0.27955    | 2.75002        | -1.92892       |
| H     | 0.78756     | 4.03215        | -1.39122       |
| C     | -0.25335    | 3.03605        | 0.23626        |
| H     | -0.45637    | 4.06925        | 0.54502        |
| H     | 0.41281     | 2.61995        | 1.00841        |
| C     | -3.43011    | 0.07032        | -1.21392       |
| C     | -2.76138    | 0.14752        | -0.00115       |
| C     | -3.27631    | -0.39132       | 1.16829        |
| C     | -4.51047    | -1.03104       | 1.11544        |
| C     | -5.20096    | -1.11949       | -0.08998       |
| C     | -4.66250    | -0.57230       | -1.25191       |
| H     | -2.99114    | 0.49535        | -2.11661       |
| H     | -2.71507    | -0.32603       | 2.10038        |
| H     | -4.92760    | -1.46716       | 2.02011        |
| H     | -6.16369    | -1.62460       | -0.12649       |
| H     | -5.19918    | -0.64998       | -2.19459       |
| Cl    | 3.25856     | -1.83483       | -1.17577       |
| Cl    | 0.02452     | -1.97438       | -0.68970       |
| Ti    | 1.79877     | -0.62658       | 0.03438        |
| Cl    | 0.60391     | -0.47365       | 2.09526        |
| Cl    | 3.49281     | 0.48516        | 1.09824        |
| N     | -1.47397    | 0.84278        | 0.05833        |
| H     | -0.89690    | 0.43420        | 0.82726        |
| H     | -0.91293    | 0.64518        | -0.78532       |

**Intermediate 2X**

|                                              |              |
|----------------------------------------------|--------------|
| Zero-point correction=                       | 0.243340     |
| (Hartree/Particle)                           |              |
| Thermal correction to Energy=                | 0.263598     |
| Thermal correction to Enthalpy=              | 0.264542     |
| Thermal correction to Gibbs Free Energy=     | 0.191396     |
| Sum of electronic and zero-point Energies=   | -2418.725993 |
| Sum of electronic and thermal Energies=      | -2418.705735 |
| Sum of electronic and thermal Enthalpies=    | -2418.704790 |
| Sum of electronic and thermal Free Energies= | -2418.777936 |

|       | E (Thermal) | CV             | S              |
|-------|-------------|----------------|----------------|
|       | KCal/Mol    | Cal/Mol-Kelvin | Cal/Mol-Kelvin |
| Total | 165.410     | 71.952         | 153.948        |
| C     | -1.34538    | 1.28605        | 0.85261        |
| H     | -1.25916    | 0.89618        | 1.87986        |
| H     | -0.8778     | 0.529          | 0.19347        |
| C     | 1.09403     | 2.55388        | -1.17119       |
| H     | 1.88978     | 2.90741        | -0.51101       |
| H     | 1.30983     | 2.89246        | -2.19154       |
| C     | -0.26712    | 3.01374        | -0.69869       |
| H     | -1.04279    | 2.65251        | -1.39487       |
| H     | -0.26333    | 4.10838        | -0.8008        |
| C     | -0.60477    | 2.611          | 0.74038        |
| H     | -1.22374    | 3.38703        | 1.21376        |
| H     | 0.31982     | 2.55965        | 1.33304        |
| C     | -3.18163    | -0.94543       | 0.6152         |
| C     | -3.55871    | 0.35933        | 0.26258        |
| C     | -4.81826    | 0.55682        | -0.32857       |
| C     | -5.66858    | -0.51354       | -0.55639       |
| C     | -5.29307    | -1.80975       | -0.20323       |
| C     | -4.04774    | -2.00997       | 0.38173        |
| H     | -2.21542    | -1.13347       | 1.08125        |
| H     | -5.12185    | 1.56834        | -0.60315       |
| H     | -6.63946    | -0.33301       | -1.0165        |
| H     | -5.9627     | -2.64828       | -0.38281       |
| H     | -3.73447    | -3.01416       | 0.66483        |
| Cl    | 3.9801      | -1.26039       | -0.83738       |
| Cl    | 0.66282     | -1.60924       | -1.41365       |
| Ti    | 2.11084     | -0.47853       | -0.05426       |
| Cl    | 1.63556     | -1.69809       | 1.7062         |
| Cl    | 2.91895     | 1.24721        | 1.1361         |
| N     | -2.74051    | 1.44869        | 0.50982        |

|   |          |         |          |
|---|----------|---------|----------|
| H | -2.97289 | 2.28632 | -0.01025 |
| O | 1.21587  | 1.10471 | -1.17675 |
| H | 0.60345  | 0.72682 | -1.8345  |

## TS 2X

|                                              |              |
|----------------------------------------------|--------------|
| Zero-point correction=                       | 0.241328     |
| (Hartree/Particle)                           |              |
| Thermal correction to Energy=                | 0.261223     |
| Thermal correction to Enthalpy=              | 0.262167     |
| Thermal correction to Gibbs Free Energy=     | 0.189373     |
| Sum of electronic and zero-point Energies=   | -2418.696814 |
| Sum of electronic and thermal Energies=      | -2418.676920 |
| Sum of electronic and thermal Enthalpies=    | -2418.675975 |
| Sum of electronic and thermal Free Energies= | -2418.748770 |

|       | E (Thermal) | CV             | S              |
|-------|-------------|----------------|----------------|
|       | KCal/Mol    | Cal/Mol-Kelvin | Cal/Mol-Kelvin |
| Total | 163.920     | 70.822         | 153.208        |

|   |          |          |          |
|---|----------|----------|----------|
| C | 2.8901   | 2.27178  | -0.41926 |
| H | 3.48066  | 3.07886  | 0.03502  |
| H | 3.35819  | 2.02023  | -1.37861 |
| C | 0.90604  | 0.28489  | -0.05062 |
| H | 0.63429  | 0.44635  | 0.98829  |
| H | 1.43458  | -0.63202 | -0.28917 |
| C | 0.6936   | 1.37983  | -1.04801 |
| H | -0.37877 | 1.59719  | -1.11564 |
| H | 1.02609  | 1.05444  | -2.04382 |
| C | 1.43656  | 2.6428   | -0.61828 |
| H | 1.00513  | 3.01599  | 0.32393  |
| H | 1.31948  | 3.43736  | -1.36454 |
| C | 4.19425  | -0.44239 | -0.99852 |
| C | 3.9385   | 0.10677  | 0.2606   |
| C | 4.65498  | -0.34501 | 1.36923  |
| C | 5.62702  | -1.32754 | 1.21765  |
| C | 5.89408  | -1.86494 | -0.03773 |
| C | 5.17346  | -1.41854 | -1.14211 |
| H | 3.6228   | -0.11577 | -1.86744 |
| H | 4.45408  | 0.08088  | 2.35264  |
| H | 6.18304  | -1.66838 | 2.08891  |
| H | 6.6571   | -2.63137 | -0.15561 |
| H | 5.36561  | -1.83999 | -2.12702 |

|    |          |          |          |
|----|----------|----------|----------|
| Cl | -4.06898 | -1.17708 | 1.52322  |
| Cl | -3.01994 | -1.95296 | -1.46495 |
| Ti | -2.61459 | -0.28992 | 0.08974  |
| Cl | -3.4687  | 1.32691  | -1.1456  |
| Cl | -1.75965 | 1.14451  | 1.68195  |
| N  | 2.90416  | 1.06801  | 0.42769  |
| H  | 2.81807  | 1.3262   | 1.41     |
| O  | -0.77314 | -0.67922 | -0.27224 |
| H  | -0.66131 | -1.36349 | -0.95341 |

## Product X

|                                              |              |
|----------------------------------------------|--------------|
| Zero-point correction=                       | 0.243708     |
| (Hartree/Particle)                           |              |
| Thermal correction to Energy=                | 0.263889     |
| Thermal correction to Enthalpy=              | 0.264833     |
| Thermal correction to Gibbs Free Energy=     | 0.191538     |
| Sum of electronic and zero-point Energies=   | -2418.754840 |
| Sum of electronic and thermal Energies=      | -2418.734659 |
| Sum of electronic and thermal Enthalpies=    | -2418.733715 |
| Sum of electronic and thermal Free Energies= | -2418.807011 |

|       | E (Thermal) | CV             | S              |
|-------|-------------|----------------|----------------|
|       | KCal/Mol    | Cal/Mol-Kelvin | Cal/Mol-Kelvin |
| Total | 165.593     | 71.073         | 154.264        |

|   |         |          |          |
|---|---------|----------|----------|
| C | 2.29074 | 1.80976  | 1.15757  |
| H | 1.56287 | 1.73656  | 1.97295  |
| H | 3.27812 | 1.5372   | 1.53638  |
| C | 1.53403 | 1.52444  | -1.15335 |
| H | 0.73911 | 0.97644  | -1.66753 |
| H | 2.44233 | 1.52994  | -1.76704 |
| C | 1.17486 | 2.90573  | -0.65262 |
| H | 0.15999 | 2.90089  | -0.22798 |
| H | 1.20418 | 3.64836  | -1.45619 |
| C | 2.22125 | 3.14381  | 0.43121  |
| H | 1.95975 | 3.95741  | 1.11475  |
| H | 3.19218 | 3.38532  | -0.02437 |
| C | 4.09976 | -0.13326 | -0.39576 |
| C | 2.77232 | -0.36858 | -0.05412 |
| C | 2.27884 | -1.65234 | 0.12843  |
| C | 3.14507 | -2.73026 | -0.03633 |

|    |          |          |          |
|----|----------|----------|----------|
| C  | 4.47647  | -2.5154  | -0.37532 |
| C  | 4.95282  | -1.21823 | -0.55455 |
| H  | 4.47044  | 0.88296  | -0.53252 |
| H  | 1.23248  | -1.80432 | 0.39013  |
| H  | 2.77063  | -3.74157 | 0.10548  |
| H  | 5.14935  | -3.36113 | -0.4993  |
| H  | 5.99449  | -1.04791 | -0.8173  |
| Cl | -3.19756 | -1.84596 | 1.19963  |
| Cl | -3.49725 | -0.6455  | -1.82747 |
| Ti | -2.15576 | -0.27513 | -0.01616 |
| Cl | -2.5142  | 1.95655  | -0.10778 |
| Cl | -0.67998 | 0.10215  | 1.8606   |
| N  | 1.86052  | 0.76579  | 0.12171  |
| H  | 0.95878  | 0.38244  | 0.47762  |
| O  | -0.6813  | -0.79526 | -0.92342 |
| H  | -0.82535 | -1.16544 | -1.80997 |

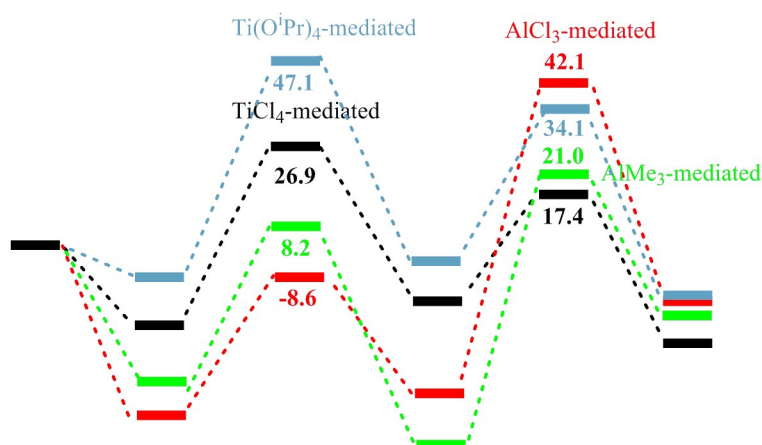

## AlCl<sub>3</sub>

|                                              |              |
|----------------------------------------------|--------------|
| Zero-point correction=                       | 0.004722     |
| (Hartree/Particle)                           |              |
| Thermal correction to Energy=                | 0.010086     |
| Thermal correction to Enthalpy=              | 0.011030     |
| Thermal correction to Gibbs Free Energy=     | -0.025709    |
| Sum of electronic and zero-point Energies=   | -1623.117811 |
| Sum of electronic and thermal Energies=      | -1623.112447 |
| Sum of electronic and thermal Enthalpies=    | -1623.111503 |
| Sum of electronic and thermal Free Energies= | -1623.148242 |

|       | E (Thermal) | CV             | S              |
|-------|-------------|----------------|----------------|
|       | KCal/Mol    | Cal/Mol-Kelvin | Cal/Mol-Kelvin |
| Total | 6.329       | 15.172         | 77.324         |



|    |    |          |         |
|----|----|----------|---------|
| Al | 0. | 0.       | 0.00186 |
| Cl | 0. | 0.       | 2.08099 |
| Cl | 0. | 1.79668  | -1.0412 |
| Cl | 0. | -1.79668 | -1.0412 |

### **AlCl<sub>3</sub> starting complex**

|                                              |              |
|----------------------------------------------|--------------|
| Zero-point correction=                       | 0.243824     |
| (Hartree/Particle)                           |              |
| Thermal correction to Energy=                | 0.261721     |
| Thermal correction to Enthalpy=              | 0.262666     |
| Thermal correction to Gibbs Free Energy=     | 0.195999     |
| Sum of electronic and zero-point Energies=   | -2142.664983 |
| Sum of electronic and thermal Energies=      | -2142.647085 |
| Sum of electronic and thermal Enthalpies=    | -2142.646141 |
| Sum of electronic and thermal Free Energies= | -2142.712808 |

|       | E (Thermal) | CV             | S              |
|-------|-------------|----------------|----------------|
|       | KCal/Mol    | Cal/Mol-Kelvin | Cal/Mol-Kelvin |
| Total | 164.233     | 64.475         | 140.311        |
| C     | 2.40413     | -0.98281       | 0.41667        |
| C     | 1.90765     | -0.38176       | -0.7361        |
| C     | 2.62194     | 0.61843        | -1.38498       |
| C     | 3.83984     | 1.04018        | -0.86159       |
| C     | 4.34179     | 0.45524        | 0.29623        |
| C     | 3.62595     | -0.55809       | 0.92706        |
| H     | 1.84084     | -1.77674       | 0.90682        |
| H     | 2.22468     | 1.071          | -2.29415       |
| H     | 4.39588     | 1.82804        | -1.36527       |
| H     | 5.29311     | 0.78791        | 0.70585        |
| H     | 4.01596     | -1.02206       | 1.83032        |
| C     | -2.25071    | 1.91326        | -0.39703       |
| H     | -2.69975    | 1.77357        | -1.38353       |
| H     | -2.89877    | 1.45358        | 0.36133        |
| C     | 0.0336      | 2.05846        | 0.22351        |
| H     | 0.641       | 1.45312        | 0.90581        |
| H     | 0.67493     | 2.4394         | -0.58365       |
| O     | -0.97572    | 1.20436        | -0.38498       |
| C     | -0.73586    | 3.16907        | 0.90107        |
| H     | -1.08472    | 2.83747        | 1.88789        |
| H     | -0.131      | 4.07261        | 1.02858        |
| C     | -1.91162    | 3.34581        | -0.04905       |
| H     | -2.76347    | 3.86594        | 0.4009         |

|    |          |          |          |
|----|----------|----------|----------|
| H  | -1.60441 | 3.90228  | -0.94495 |
| N  | 0.60571  | -0.7892  | -1.24952 |
| H  | 0.33353  | -0.17735 | -2.0236  |
| H  | 0.66746  | -1.73907 | -1.63245 |
| Al | -1.00972 | -0.92128 | -0.00554 |
| Cl | -0.51511 | -3.07438 | 0.31855  |
| Cl | -1.22124 | -0.36294 | 2.08166  |
| Cl | -2.70326 | -1.09034 | -1.33646 |

## AlCl<sub>3</sub> TS 1

|                                              |              |
|----------------------------------------------|--------------|
| Zero-point correction=                       | 0.238322     |
| (Hartree/Particle)                           |              |
| Thermal correction to Energy=                | 0.256586     |
| Thermal correction to Enthalpy=              | 0.257530     |
| Thermal correction to Gibbs Free Energy=     | 0.189314     |
| Sum of electronic and zero-point Energies=   | -2142.606667 |
| Sum of electronic and thermal Energies=      | -2142.588403 |
| Sum of electronic and thermal Enthalpies=    | -2142.587458 |
| Sum of electronic and thermal Free Energies= | -2142.655675 |

|       | E (Thermal) | CV             | S              |
|-------|-------------|----------------|----------------|
|       | KCal/Mol    | Cal/Mol-Kelvin | Cal/Mol-Kelvin |
| Total | 161.010     | 66.017         | 143.574        |
| C     | 0.38875     | 0.95344        | -1.64507       |
| H     | 1.45337     | 0.75405        | -1.72368       |
| H     | -0.27181    | 0.2603         | -2.16597       |
| C     | -0.73434    | 1.71928        | 1.02238        |
| H     | -1.71926    | 2.21728        | 0.9755         |
| H     | -0.44346    | 1.65825        | 2.08323        |
| O     | -0.77712    | 0.43867        | 0.45711        |
| C     | 0.27676     | 2.54716        | 0.24371        |
| H     | 1.30479     | 2.2311         | 0.47903        |
| H     | 0.19061     | 3.61586        | 0.46958        |
| C     | -0.03043    | 2.28613        | -1.24225       |
| H     | 0.58959     | 2.97551        | -1.8442        |
| H     | -1.09264    | 2.46316        | -1.44905       |
| C     | 3.05787     | 0.05847        | 1.11482        |
| C     | 2.75128     | -0.71408       | -0.01475       |
| C     | 3.78426     | -1.10468       | -0.87716       |
| C     | 5.09589     | -0.73937       | -0.60298       |
| C     | 5.39951     | 0.02645        | 0.51962        |
| C     | 4.37222     | 0.42085        | 1.37452        |

|    |          |          |          |
|----|----------|----------|----------|
| H  | 2.25801  | 0.34779  | 1.79809  |
| H  | 3.54778  | -1.70235 | -1.75774 |
| H  | 5.88964  | -1.05732 | -1.27668 |
| H  | 6.42835  | 0.31002  | 0.7299   |
| H  | 4.59787  | 1.01171  | 2.26051  |
| N  | 1.43083  | -1.01028 | -0.32177 |
| H  | 1.2567   | -1.84377 | -0.87486 |
| H  | 0.72789  | -0.85747 | 0.39763  |
| Al | -2.31032 | -0.40618 | 0.14301  |
| Cl | -3.41932 | -0.57338 | 1.96518  |
| Cl | -3.38386 | 0.74423  | -1.33419 |
| Cl | -1.70581 | -2.30396 | -0.67345 |

### AlCl<sub>3</sub> intermediate 1

|                                              |              |
|----------------------------------------------|--------------|
| Zero-point correction=                       | 0.230786     |
| (Hartree/Particle)                           |              |
| Thermal correction to Energy=                | 0.245217     |
| Thermal correction to Enthalpy=              | 0.246161     |
| Thermal correction to Gibbs Free Energy=     | 0.188932     |
| Sum of electronic and zero-point Energies=   | -1681.883637 |
| Sum of electronic and thermal Energies=      | -1681.869206 |
| Sum of electronic and thermal Enthalpies=    | -1681.868262 |
| Sum of electronic and thermal Free Energies= | -1681.925491 |

|       | E (Thermal) |          | CV             | S              |
|-------|-------------|----------|----------------|----------------|
|       | KCal/Mol    |          | Cal/Mol-Kelvin | Cal/Mol-Kelvin |
| Total | 153.876     |          | 55.051         | 120.450        |
| C     | 1.97267     | -1.52932 | 0.02588        |                |
| C     | 1.47499     | -0.37049 | -0.55857       |                |
| C     | 2.28305     | 0.75705  | -0.69011       |                |
| C     | 3.59316     | 0.72285  | -0.23177       |                |
| C     | 4.10072     | -0.43162 | 0.35707        |                |
| C     | 3.28839     | -1.55119 | 0.48186        |                |
| H     | 1.35652     | -2.41804 | 0.13444        |                |
| H     | 1.88459     | 1.66383  | -1.1462        |                |
| H     | 4.21906     | 1.60609  | -0.33792       |                |
| H     | 5.12703     | -0.45738 | 0.71634        |                |
| H     | 3.67506     | -2.4602  | 0.93791        |                |
| C     | -0.56891    | -1.56487 | -1.40218       |                |
| H     | -1.31869    | -1.31057 | -2.15967       |                |
| H     | 0.19471     | -2.18057 | -1.89412       |                |
| C     | -3.17886    | -0.8667  | 0.53239        |                |

|    |          |          |          |
|----|----------|----------|----------|
| H  | -2.87087 | -0.8995  | 1.59498  |
| H  | -4.2773  | -0.79506 | 0.52843  |
| O  | -2.64835 | 0.26043  | -0.10981 |
| C  | -2.7511  | -2.15609 | -0.14378 |
| H  | -3.19322 | -2.20868 | -1.15114 |
| H  | -3.16956 | -2.9995  | 0.42457  |
| C  | -1.23423 | -2.32473 | -0.24891 |
| H  | -1.00953 | -3.39033 | -0.3946  |
| H  | -0.76527 | -2.0589  | 0.71223  |
| N  | 0.09452  | -0.27027 | -1.02911 |
| H  | 0.13438  | 0.28601  | -1.88944 |
| Al | -1.0818  | 0.90986  | 0.12488  |
| Cl | -0.82726 | 2.80275  | -0.83759 |
| Cl | -0.30673 | 0.81452  | 2.11122  |

## AlCl<sub>3</sub> TS 2

|                                              |              |
|----------------------------------------------|--------------|
| Zero-point correction=                       | 0.225240     |
| (Hartree/Particle)                           |              |
| Thermal correction to Energy=                | 0.241096     |
| Thermal correction to Enthalpy=              | 0.242040     |
| Thermal correction to Gibbs Free Energy=     | 0.179417     |
| Sum of electronic and zero-point Energies=   | -1681.750402 |
| Sum of electronic and thermal Energies=      | -1681.734546 |
| Sum of electronic and thermal Enthalpies=    | -1681.733602 |
| Sum of electronic and thermal Free Energies= | -1681.796225 |

|       | E (Thermal) | CV             | S              |
|-------|-------------|----------------|----------------|
|       | KCal/Mol    | Cal/Mol-Kelvin | Cal/Mol-Kelvin |
| Total | 151.290     | 58.227         | 131.801        |
| C     | -3.49782    | 0.44501        | -0.64034       |
| C     | -2.31162    | -0.23683       | -0.34288       |
| C     | -2.38271    | -1.52235       | 0.21978        |
| C     | -3.6128     | -2.11669       | 0.4491         |
| C     | -4.79467    | -1.4447        | 0.13627        |
| C     | -4.72571    | -0.16611       | -0.40545       |
| H     | -3.46794    | 1.4458         | -1.06747       |
| H     | -1.45088    | -2.03147       | 0.46847        |
| H     | -3.6513     | -3.11635       | 0.87856        |
| H     | -5.75952    | -1.91402       | 0.31645        |
| H     | -5.63999    | 0.37168        | -0.6513        |
| C     | -0.82024    | 1.5919         | -1.15811       |
| H     | 0.18753     | 1.57025        | -1.5957        |

|    |          |          |          |
|----|----------|----------|----------|
| H  | -1.52901 | 1.7703   | -1.97816 |
| C  | -0.20487 | 0.95838  | 1.57006  |
| H  | -1.22777 | 0.65365  | 1.79104  |
| H  | 0.55721  | 0.48256  | 2.17269  |
| O  | 1.05171  | -0.77105 | 0.55061  |
| C  | 0.0513   | 2.29453  | 1.02053  |
| H  | 1.10545  | 2.3797   | 0.71787  |
| H  | -0.06593 | 2.97193  | 1.8902   |
| C  | -0.89252 | 2.69277  | -0.09721 |
| H  | -0.62247 | 3.66898  | -0.51667 |
| H  | -1.92101 | 2.77032  | 0.28623  |
| Cl | 3.52607  | 1.32524  | -0.17769 |
| Cl | 3.98729  | -2.15229 | -0.32792 |
| N  | -1.0524  | 0.3144   | -0.5314  |
| H  | -0.23568 | -0.31568 | -0.41554 |
| Al | 2.62287  | -0.5889  | 0.08485  |

### **AlMe<sub>3</sub>**

|                                              |             |
|----------------------------------------------|-------------|
| Zero-point correction=                       | 0.104969    |
| (Hartree/Particle)                           |             |
| Thermal correction to Energy=                | 0.112784    |
| Thermal correction to Enthalpy=              | 0.113728    |
| Thermal correction to Gibbs Free Energy=     | 0.072638    |
| Sum of electronic and zero-point Energies=   | -361.963175 |
| Sum of electronic and thermal Energies=      | -361.955360 |
| Sum of electronic and thermal Enthalpies=    | -361.954415 |
| Sum of electronic and thermal Free Energies= | -361.995506 |

|       | E (Thermal) |          | CV             | S              |
|-------|-------------|----------|----------------|----------------|
|       | KCal/Mol    |          | Cal/Mol-Kelvin | Cal/Mol-Kelvin |
| Total | 70.773      |          | 25.599         | 86.482         |
| Al    | 0.00258     | -0.00217 | -0.00345       |                |
| C     | -0.5457     | 1.88111  | 0.00503        |                |
| H     | 0.11324     | 2.50092  | 0.62784        |                |
| H     | -0.49377    | 2.30014  | -1.01091       |                |
| H     | -1.57539    | 2.026    | 0.35585        |                |
| C     | -1.36262    | -1.41072 | -0.00046       |                |
| H     | -0.94821    | -2.41721 | -0.13776       |                |
| H     | -1.91847    | -1.41272 | 0.94849        |                |
| H     | -2.10955    | -1.24744 | -0.78994       |                |
| C     | 1.9073      | -0.46943 | -0.00271       |                |
| H     | 2.2254      | -0.77502 | 1.00533        |                |

|   |         |          |          |
|---|---------|----------|----------|
| H | 2.12546 | -1.31803 | -0.66483 |
| H | 2.55388 | 0.36577  | -0.30046 |

### **AlMe<sub>3</sub> starting complex**

|                                              |             |
|----------------------------------------------|-------------|
| Zero-point correction=                       | 0.295673    |
| (Hartree/Particle)                           |             |
| Thermal correction to Energy=                | 0.312805    |
| Thermal correction to Enthalpy=              | 0.313749    |
| Thermal correction to Gibbs Free Energy=     | 0.250109    |
| Sum of electronic and zero-point Energies=   | -841.083319 |
| Sum of electronic and thermal Energies=      | -841.066188 |
| Sum of electronic and thermal Enthalpies=    | -841.065244 |
| Sum of electronic and thermal Free Energies= | -841.128884 |

|       | E (Thermal) | CV             | S              |
|-------|-------------|----------------|----------------|
|       | KCal/Mol    | Cal/Mol-Kelvin | Cal/Mol-Kelvin |
| Total | 196.288     | 64.518         | 133.942        |

|   |          |          |          |
|---|----------|----------|----------|
| C | 3.10435  | 0.46186  | -1.07266 |
| C | 1.89828  | 0.39667  | -0.34878 |
| C | 1.86234  | -0.46713 | 0.76478  |
| C | 2.97737  | -1.20718 | 1.13312  |
| C | 4.16572  | -1.12839 | 0.4101   |
| C | 4.21191  | -0.28627 | -0.69863 |
| H | 3.15882  | 1.12068  | -1.94145 |
| H | 0.93975  | -0.55652 | 1.34031  |
| H | 2.91405  | -1.86134 | 2.00282  |
| H | 5.03606  | -1.71237 | 0.70286  |
| H | 5.12757  | -0.20723 | -1.28469 |
| C | -2.78239 | -0.64493 | 0.88248  |
| H | -2.57157 | -0.64401 | 1.95628  |
| H | -3.46453 | 0.18562  | 0.64493  |
| C | -1.4173  | -1.28802 | -0.96522 |
| H | -1.08555 | -0.68307 | -1.81514 |
| H | -0.6451  | -2.03312 | -0.73571 |
| O | -1.52825 | -0.41246 | 0.19164  |
| C | -2.79617 | -1.89515 | -1.11735 |
| H | -3.44213 | -1.23044 | -1.70789 |
| H | -2.76526 | -2.87075 | -1.61276 |
| C | -3.28109 | -1.9612  | 0.32692  |
| H | -4.36687 | -2.06349 | 0.41975  |

|    |          |          |          |
|----|----------|----------|----------|
| H  | -2.80928 | -2.80176 | 0.85288  |
| N  | 0.79105  | 1.13307  | -0.71718 |
| H  | 0.95972  | 1.65847  | -1.57102 |
| Al | -0.82566 | 1.44119  | 0.12658  |
| C  | -2.09187 | 2.29847  | -1.12204 |
| H  | -2.4446  | 1.58994  | -1.88861 |
| H  | -2.98743 | 2.68644  | -0.61582 |
| H  | -1.64828 | 3.14636  | -1.66292 |
| C  | -0.84262 | 1.8813   | 2.04408  |
| H  | -1.8644  | 1.97446  | 2.44119  |
| H  | -0.3242  | 1.13214  | 2.65967  |
| H  | -0.34588 | 2.84259  | 2.2361   |

### AIME<sub>3</sub>TS1

|                                              |             |
|----------------------------------------------|-------------|
| Zero-point correction=                       | 0.292558    |
| (Hartree/Particle)                           |             |
| Thermal correction to Energy=                | 0.309688    |
| Thermal correction to Enthalpy=              | 0.310633    |
| Thermal correction to Gibbs Free Energy=     | 0.248165    |
| Sum of electronic and zero-point Energies=   | -841.015473 |
| Sum of electronic and thermal Energies=      | -840.998343 |
| Sum of electronic and thermal Enthalpies=    | -840.997399 |
| Sum of electronic and thermal Free Energies= | -841.059866 |

|       | E (Thermal) | CV             | S              |
|-------|-------------|----------------|----------------|
|       | KCal/Mol    | Cal/Mol-Kelvin | Cal/Mol-Kelvin |
| Total | 194.332     | 66.156         | 131.475        |
| C     | 2.13131     | 0.33708        | 0.92569        |
| C     | 1.70397     | 0.1302         | -0.401         |
| C     | 2.6288      | -0.4134        | -1.31366       |
| C     | 3.93014     | -0.70014       | -0.92688       |
| C     | 4.34539     | -0.47433       | 0.38356        |
| C     | 3.43343     | 0.04168        | 1.30263        |
| H     | 1.42578     | 0.74681        | 1.64781        |
| H     | 2.31046     | -0.59183       | -2.34224       |
| H     | 4.62768     | -1.10757       | -1.65758       |
| H     | 5.36606     | -0.70028       | 0.68547        |
| H     | 3.74181     | 0.22056        | 2.3319         |
| N     | 0.40105     | 0.38645        | -0.76846       |
| H     | 0.27988     | 0.24956        | -1.77264       |
| C     | -0.75701    | -1.70209       | -0.24261       |

|    |          |          |          |
|----|----------|----------|----------|
| H  | -0.75251 | -1.92271 | -1.30794 |
| H  | 0.2201   | -1.65687 | 0.23394  |
| C  | -3.37868 | -0.44554 | -0.13984 |
| H  | -3.55656 | -0.0093  | 0.86235  |
| H  | -4.25016 | -0.19404 | -0.76688 |
| O  | -2.20293 | 0.01926  | -0.7101  |
| C  | -3.24181 | -1.9607  | -0.00955 |
| H  | -3.30592 | -2.42401 | -1.0052  |
| H  | -4.03398 | -2.39121 | 0.61486  |
| C  | -1.87053 | -2.2008  | 0.58015  |
| H  | -1.65602 | -3.28639 | 0.65698  |
| H  | -1.79602 | -1.81056 | 1.60631  |
| Al | -1.10577 | 1.29467  | -0.01129 |
| C  | -1.12739 | 1.23002  | 1.96908  |
| H  | -2.12494 | 1.46206  | 2.37258  |
| H  | -0.83988 | 0.25279  | 2.38897  |
| H  | -0.44474 | 1.97308  | 2.40866  |
| C  | -1.40296 | 3.03883  | -0.88521 |
| H  | -0.67392 | 3.79215  | -0.55297 |
| H  | -1.3142  | 2.97123  | -1.97933 |
| H  | -2.39973 | 3.45181  | -0.67241 |

## AlMe<sub>3</sub> intermediate 1

|                                              |             |
|----------------------------------------------|-------------|
| Zero-point correction=                       | 0.298727    |
| (Hartree/Particle)                           |             |
| Thermal correction to Energy=                | 0.315408    |
| Thermal correction to Enthalpy=              | 0.316352    |
| Thermal correction to Gibbs Free Energy=     | 0.255617    |
| Sum of electronic and zero-point Energies=   | -841.095461 |
| Sum of electronic and thermal Energies=      | -841.078781 |
| Sum of electronic and thermal Enthalpies=    | -841.077837 |
| Sum of electronic and thermal Free Energies= | -841.138572 |

|       | E (Thermal) | CV             | S              |
|-------|-------------|----------------|----------------|
|       | KCal/Mol    | Cal/Mol-Kelvin | Cal/Mol-Kelvin |
| Total | 197.921     | 64.706         | 127.828        |

|   |         |          |          |
|---|---------|----------|----------|
| C | 1.75834 | -1.38779 | 0.21153  |
| C | 1.35718 | -0.26995 | -0.51501 |
| C | 2.26377 | 0.76176  | -0.76146 |
| C | 3.56038 | 0.67982  | -0.27109 |



|    |          |          |          |
|----|----------|----------|----------|
| C  | 3.96388  | -0.43034 | 0.4653   |
| C  | 3.06048  | -1.46022 | 0.69833  |
| H  | 1.06618  | -2.20289 | 0.40918  |
| H  | 1.948    | 1.63237  | -1.33752 |
| H  | 4.25987  | 1.48925  | -0.47016 |
| H  | 4.97887  | -0.49339 | 0.85164  |
| H  | 3.36494  | -2.33612 | 1.26803  |
| C  | -0.75194 | -1.35026 | -1.30891 |
| H  | -1.45949 | -1.07507 | -2.09965 |
| H  | -0.03498 | -2.05925 | -1.74651 |
| C  | -3.27798 | -0.30422 | 0.60515  |
| H  | -2.96027 | -0.37595 | 1.66661  |
| H  | -4.36903 | -0.13595 | 0.62739  |
| O  | -2.65288 | 0.7555   | -0.04503 |
| C  | -3.00362 | -1.64187 | -0.06307 |
| H  | -3.43941 | -1.64071 | -1.07533 |
| H  | -3.52994 | -2.42655 | 0.50178  |
| C  | -1.51967 | -2.00264 | -0.15461 |
| H  | -1.43034 | -3.09024 | -0.2876  |
| H  | -1.03106 | -1.7819  | 0.80725  |
| Al | -1.01279 | 1.28496  | 0.26521  |
| C  | -0.29105 | 0.98111  | 2.07348  |
| H  | 0.76705  | 1.27912  | 2.12601  |
| H  | -0.8275  | 1.58448  | 2.82024  |
| H  | -0.34033 | -0.06247 | 2.41729  |
| C  | -0.61493 | 2.96453  | -0.68742 |
| H  | -1.32636 | 3.74778  | -0.38944 |
| H  | 0.38849  | 3.35988  | -0.4733  |
| H  | -0.70231 | 2.87529  | -1.78144 |
| N  | -0.00063 | -0.10433 | -0.97756 |
| H  | 0.04222  | 0.45461  | -1.83239 |

## **AIME<sub>3</sub> TS2**

|                                              |             |
|----------------------------------------------|-------------|
| Zero-point correction=                       | 0.246003    |
| (Hartree/Particle)                           |             |
| Thermal correction to Energy=                | 0.260353    |
| Thermal correction to Enthalpy=              | 0.261297    |
| Thermal correction to Gibbs Free Energy=     | 0.204645    |
| Sum of electronic and zero-point Energies=   | -800.546160 |
| Sum of electronic and thermal Energies=      | -800.531810 |
| Sum of electronic and thermal Enthalpies=    | -800.530865 |
| Sum of electronic and thermal Free Energies= | -800.587517 |

|       | E (Thermal) |          | CV             |  | S              |
|-------|-------------|----------|----------------|--|----------------|
|       | KCal/Mol    |          | Cal/Mol-Kelvin |  | Cal/Mol-Kelvin |
| Total | 163.374     |          | 55.484         |  | 119.233        |
| C     | 1.87525     | -0.99167 | -0.72945       |  |                |
| C     | 0.95281     | -0.07954 | -0.19207       |  |                |
| C     | 1.44592     | 0.90774  | 0.6819         |  |                |
| C     | 2.79619     | 1.00039  | 0.97915        |  |                |
| C     | 3.70305     | 0.10058  | 0.42321        |  |                |
| C     | 3.229       | -0.89154 | -0.42743       |  |                |
| H     | 1.54524     | -1.78076 | -1.40135       |  |                |
| H     | 0.75002     | 1.62121  | 1.13282        |  |                |
| H     | 3.14198     | 1.7815   | 1.65391        |  |                |
| H     | 4.76348     | 0.16979  | 0.65554        |  |                |
| H     | 3.92181     | -1.60775 | -0.86677       |  |                |
| C     | -0.95124    | -1.16548 | -1.29507       |  |                |
| H     | -1.934      | -0.84586 | -1.67451       |  |                |
| H     | -0.315      | -1.32555 | -2.17704       |  |                |
| C     | -1.45347    | -0.94514 | 1.46277        |  |                |
| H     | -0.40195    | -0.95648 | 1.75584        |  |                |
| H     | -2.12541    | -0.36462 | 2.08097        |  |                |
| O     | -2.84921    | 0.93024  | 0.70098        |  |                |
| C     | -1.98791    | -2.09369 | 0.71703        |  |                |
| H     | -3.02988    | -1.89292 | 0.43907        |  |                |
| H     | -2.00045    | -2.93639 | 1.43428        |  |                |
| C     | -1.13792    | -2.4489  | -0.49059       |  |                |
| H     | -1.61106    | -3.23254 | -1.09515       |  |                |
| H     | -0.16066    | -2.83191 | -0.16163       |  |                |
| Al    | -1.54805    | 1.40779  | -0.18596       |  |                |
| C     | -0.87852    | 3.08787  | -0.91351       |  |                |
| H     | -0.73945    | 3.81685  | -0.10394       |  |                |
| H     | 0.08844     | 2.95797  | -1.41602       |  |                |
| H     | -1.57911    | 3.53555  | -1.62908       |  |                |
| N     | -0.4221     | -0.105   | -0.44471       |  |                |

## Ti(O<sup>i</sup>Pr)<sub>4</sub>

|                                 |          |
|---------------------------------|----------|
| Zero-point correction=          | 0.391074 |
| (Hartree/Particle)              |          |
| Thermal correction to Energy=   | 0.415141 |
| Thermal correction to Enthalpy= | 0.416085 |

|                                              |             |
|----------------------------------------------|-------------|
| Thermal correction to Gibbs Free Energy=     | 0.335812    |
| Sum of electronic and zero-point Energies=   | -832.703851 |
| Sum of electronic and thermal Energies=      | -832.679784 |
| Sum of electronic and thermal Enthalpies=    | -832.678839 |
| Sum of electronic and thermal Free Energies= | -832.759112 |

|       | E (Thermal) | CV             | S              |
|-------|-------------|----------------|----------------|
|       | KCal/Mol    | Cal/Mol-Kelvin | Cal/Mol-Kelvin |
| Total | 260.505     | 86.358         | 168.948        |

|    |          |          |          |
|----|----------|----------|----------|
| Ti | 0.07173  | 0.07684  | -0.30361 |
| O  | 1.38226  | -0.82808 | -1.13752 |
| O  | 0.51174  | 1.79628  | 0.0235   |
| O  | -1.45378 | -0.05112 | -1.268   |
| O  | -0.20111 | -0.71028 | 1.28401  |
| C  | 2.77242  | -1.07364 | -1.11876 |
| H  | 2.90558  | -2.12487 | -0.80418 |
| C  | 3.47085  | -0.16757 | -0.12107 |
| H  | 3.35605  | 0.88478  | -0.41739 |
| H  | 3.04634  | -0.28768 | 0.88621  |
| H  | 4.54297  | -0.39785 | -0.07011 |
| C  | 3.32442  | -0.90264 | -2.52053 |
| H  | 4.39522  | -1.14261 | -2.54999 |
| H  | 2.80085  | -1.55651 | -3.22776 |
| H  | 3.19274  | 0.13774  | -2.8489  |
| C  | 0.25149  | 2.78812  | 0.99245  |
| H  | 0.59951  | 2.40749  | 1.97161  |
| C  | 1.03773  | 4.03552  | 0.63907  |
| H  | 0.69514  | 4.4348   | -0.32571 |
| H  | 0.90311  | 4.81195  | 1.40332  |
| H  | 2.10782  | 3.80878  | 0.55716  |
| C  | -1.24037 | 3.05889  | 1.06673  |
| H  | -1.6094  | 3.38281  | 0.08283  |
| H  | -1.7938  | 2.15584  | 1.36241  |
| H  | -1.46262 | 3.84674  | 1.79864  |
| C  | -2.80062 | -0.34383 | -0.95158 |
| H  | -2.93653 | -0.22977 | 0.14161  |
| C  | -3.70343 | 0.64212  | -1.66607 |
| H  | -4.75712 | 0.45778  | -1.41863 |
| H  | -3.45436 | 1.67254  | -1.38447 |
| H  | -3.58005 | 0.54349  | -2.75345 |
| C  | -3.10119 | -1.77861 | -1.33916 |
| H  | -2.9605  | -1.91034 | -2.42096 |

|   |          |          |          |
|---|----------|----------|----------|
| H | -2.42636 | -2.4711  | -0.81841 |
| H | -4.13626 | -2.04597 | -1.08822 |
| C | 0.22656  | -1.86368 | 1.98387  |
| H | 1.32772  | -1.92568 | 1.89932  |
| C | -0.38707 | -3.09302 | 1.34335  |
| H | -0.06463 | -4.00779 | 1.85753  |
| H | -1.48424 | -3.03354 | 1.39813  |
| H | -0.09358 | -3.16509 | 0.28693  |
| C | -0.15595 | -1.72291 | 3.44317  |
| H | -1.24864 | -1.65795 | 3.53977  |
| H | 0.19177  | -2.589   | 4.02085  |
| H | 0.28333  | -0.81638 | 3.87655  |

### Ti(O<sup>i</sup>Pr)<sub>4</sub> starting complex

|                                              |              |
|----------------------------------------------|--------------|
| Zero-point correction=                       | 0.629457     |
| (Hartree/Particle)                           |              |
| Thermal correction to Energy=                | 0.664551     |
| Thermal correction to Enthalpy=              | 0.665496     |
| Thermal correction to Gibbs Free Energy=     | 0.563315     |
| Sum of electronic and zero-point Energies=   | -1352.199441 |
| Sum of electronic and thermal Energies=      | -1352.164347 |
| Sum of electronic and thermal Enthalpies=    | -1352.163403 |
| Sum of electronic and thermal Free Energies= | -1352.265583 |

|       | E (Thermal) | CV             | S              |
|-------|-------------|----------------|----------------|
|       | KCal/Mol    | Cal/Mol-Kelvin | Cal/Mol-Kelvin |
| Total | 417.012     | 133.688        | 215.057        |
| C     | -3.41624    | 0.65138        | -1.4876        |
| C     | -2.5611     | -0.44536       | -1.38892       |
| C     | -3.05006    | -1.6691        | -0.93466       |
| C     | -4.38747    | -1.79102       | -0.57699       |
| C     | -5.24718    | -0.69928       | -0.67562       |
| C     | -4.75503    | 0.5198         | -1.13507       |
| H     | -3.02464    | 1.60978        | -1.83314       |
| H     | -2.36508    | -2.51214       | -0.84823       |
| H     | -4.76119    | -2.74977       | -0.22011       |
| H     | -6.29511    | -0.79863       | -0.3992        |
| H     | -5.41777    | 1.3797         | -1.21891       |
| C     | 2.92642     | -0.71735       | -1.85781       |
| H     | 2.89004     | -0.17688       | -2.81169       |

|    |          |          |          |
|----|----------|----------|----------|
| H  | 3.20077  | -0.0083  | -1.06829 |
| C  | 1.64801  | -2.63526 | -1.4576  |
| H  | 0.85849  | -2.93921 | -0.76392 |
| H  | 1.44533  | -3.07231 | -2.45092 |
| O  | 1.6026   | -1.20776 | -1.55041 |
| C  | 3.06247  | -2.93888 | -1.01743 |
| H  | 3.17703  | -2.70924 | 0.05296  |
| H  | 3.35329  | -3.98155 | -1.18655 |
| C  | 3.83815  | -1.9398  | -1.87041 |
| H  | 4.83641  | -1.71178 | -1.47967 |
| H  | 3.95785  | -2.33261 | -2.8898  |
| Ti | 0.37906  | 0.19557  | 0.0232   |
| N  | -1.18231 | -0.30636 | -1.69997 |
| H  | -0.77988 | -1.17264 | -2.05449 |
| H  | -1.01058 | 0.42215  | -2.39132 |
| O  | -0.72844 | 1.36044  | 0.85624  |
| O  | 0.97804  | 1.43056  | -1.25232 |
| O  | 1.88278  | 0.19384  | 1.06491  |
| O  | -0.25041 | -1.44138 | 0.68031  |
| C  | -1.40904 | 1.42328  | 2.08964  |
| H  | -0.71807 | 1.06587  | 2.87807  |
| C  | -1.76349 | 2.8726   | 2.36859  |
| H  | -2.29403 | 2.97202  | 3.32522  |
| H  | -0.86323 | 3.50045  | 2.40529  |
| H  | -2.41561 | 3.25457  | 1.56925  |
| C  | -2.64046 | 0.53597  | 2.08087  |
| H  | -3.38574 | 0.91771  | 1.36831  |
| H  | -2.37666 | -0.4861  | 1.77892  |
| H  | -3.09748 | 0.50715  | 3.08019  |
| C  | 0.4892   | 2.61675  | -1.79653 |
| H  | -0.62453 | 2.59237  | -1.79901 |
| C  | 0.91653  | 3.80462  | -0.95001 |
| H  | 2.01496  | 3.85594  | -0.91    |
| H  | 0.54005  | 4.74952  | -1.36642 |
| H  | 0.53499  | 3.69468  | 0.07291  |
| C  | 0.97113  | 2.7515   | -3.23281 |
| H  | 0.56812  | 3.6538   | -3.71276 |
| H  | 2.0695   | 2.80996  | -3.25079 |
| H  | 0.67359  | 1.87794  | -3.83047 |
| C  | 2.82276  | 1.17395  | 1.41797  |
| H  | 3.03771  | 1.79307  | 0.5229   |
| C  | 2.25721  | 2.07637  | 2.50108  |
| H  | 2.97038  | 2.86812  | 2.7683   |
| H  | 1.32394  | 2.54385  | 2.16074  |

|   |          |          |         |
|---|----------|----------|---------|
| H | 2.03685  | 1.48842  | 3.40484 |
| C | 4.09815  | 0.48657  | 1.87321 |
| H | 3.88751  | -0.13547 | 2.7559  |
| H | 4.49457  | -0.16737 | 1.08451 |
| H | 4.87267  | 1.21792  | 2.14059 |
| C | 0.15208  | -2.35701 | 1.66076 |
| H | 1.19304  | -2.68145 | 1.43961 |
| C | -0.75526 | -3.57698 | 1.61524 |
| H | -0.73688 | -4.05472 | 0.62585 |
| H | -0.45658 | -4.32518 | 2.36225 |
| H | -1.79215 | -3.27356 | 1.82477 |
| C | 0.15191  | -1.73903 | 3.051   |
| H | 0.81499  | -0.86563 | 3.07767 |
| H | -0.86493 | -1.42016 | 3.32497 |
| H | 0.49621  | -2.46615 | 3.79989 |

## Ti(O<sup>i</sup>Pr)<sub>4</sub> TS1

|                                              |              |
|----------------------------------------------|--------------|
| Zero-point correction=                       | 0.625231     |
| (Hartree/Particle)                           |              |
| Thermal correction to Energy=                | 0.660755     |
| Thermal correction to Enthalpy=              | 0.661699     |
| Thermal correction to Gibbs Free Energy=     | 0.559456     |
| Sum of electronic and zero-point Energies=   | -1352.112094 |
| Sum of electronic and thermal Energies=      | -1352.076570 |
| Sum of electronic and thermal Enthalpies=    | -1352.075626 |
| Sum of electronic and thermal Free Energies= | -1352.177869 |

|       | E (Thermal) | CV             | S              |
|-------|-------------|----------------|----------------|
|       | KCal/Mol    | Cal/Mol-Kelvin | Cal/Mol-Kelvin |
| Total | 414.630     | 135.908        | 215.189        |

|   |          |          |          |
|---|----------|----------|----------|
| C | 1.51824  | -2.14518 | -0.58742 |
| H | 2.52895  | -2.20001 | -0.98493 |
| H | 1.3775   | -1.55476 | 0.32042  |
| C | -0.81859 | -1.86751 | -2.41304 |
| H | -1.77975 | -2.19679 | -1.98093 |
| H | -1.00375 | -1.52611 | -3.44736 |
| O | -0.24915 | -0.8557  | -1.66068 |
| C | 0.13772  | -3.05607 | -2.42889 |
| H | 1.00396  | -2.8528  | -3.0772  |
| H | -0.34882 | -3.97187 | -2.78707 |

|    |          |          |          |
|----|----------|----------|----------|
| C  | 0.59732  | -3.21408 | -0.97278 |
| H  | 1.17875  | -4.14975 | -0.88452 |
| H  | -0.28005 | -3.24887 | -0.31262 |
| C  | 4.77721  | -0.22471 | -1.27008 |
| C  | 3.55088  | 0.07063  | -0.65923 |
| C  | 3.51193  | 0.30192  | 0.72536  |
| C  | 4.68557  | 0.27857  | 1.46591  |
| C  | 5.90835  | 0.00741  | 0.85303  |
| C  | 5.94394  | -0.24877 | -0.51585 |
| H  | 4.80865  | -0.41711 | -2.34328 |
| H  | 2.5431   | 0.48326  | 1.19432  |
| H  | 4.64217  | 0.46833  | 2.53795  |
| H  | 6.82517  | -0.01013 | 1.43896  |
| H  | 6.89227  | -0.46626 | -1.00501 |
| Ti | -0.97936 | 0.14989  | -0.15556 |
| N  | 2.36465  | 0.01861  | -1.37679 |
| H  | 1.58841  | 0.64176  | -1.10978 |
| H  | 2.45529  | -0.03503 | -2.38634 |
| O  | 0.19264  | 0.0905   | 1.27305  |
| O  | -0.06366 | 1.62533  | -1.00041 |
| O  | -1.9689  | -1.38606 | 0.29244  |
| O  | -2.40999 | 1.21861  | 0.27832  |
| C  | -0.16282 | -0.15446 | 2.6166   |
| H  | -1.26579 | -0.20396 | 2.69982  |
| C  | 0.33134  | 0.99739  | 3.47255  |
| H  | 1.42765  | 1.07348  | 3.41138  |
| H  | -0.09731 | 1.94598  | 3.12133  |
| H  | 0.05362  | 0.85811  | 4.52609  |
| C  | 0.41421  | -1.48819 | 3.05344  |
| H  | 1.5123   | -1.46893 | 2.97323  |
| H  | 0.15075  | -1.71635 | 4.09546  |
| H  | 0.02594  | -2.29486 | 2.41601  |
| C  | 0.03055  | 2.94517  | -0.54161 |
| H  | -0.75805 | 3.12816  | 0.21884  |
| C  | 1.37895  | 3.18411  | 0.12098  |
| H  | 2.19192  | 3.03147  | -0.60604 |
| H  | 1.45621  | 4.21104  | 0.50477  |
| H  | 1.52523  | 2.48872  | 0.95737  |
| C  | -0.17637 | 3.90833  | -1.70082 |
| H  | 0.61769  | 3.76704  | -2.44905 |
| H  | -1.1396  | 3.72505  | -2.19593 |
| H  | -0.15126 | 4.95455  | -1.36498 |
| C  | -3.30484 | 2.041    | -0.41886 |
| H  | -2.73947 | 2.86757  | -0.89205 |

|   |          |          |          |
|---|----------|----------|----------|
| C | -4.00603 | 1.26101  | -1.51955 |
| H | -4.67414 | 1.91041  | -2.10172 |
| H | -3.27367 | 0.81872  | -2.21277 |
| H | -4.60657 | 0.44741  | -1.08645 |
| C | -4.29563 | 2.63823  | 0.56327  |
| H | -4.99196 | 3.32118  | 0.05829  |
| H | -4.87846 | 1.83861  | 1.04313  |
| H | -3.76845 | 3.19532  | 1.3482   |
| C | -3.23987 | -1.70673 | 0.75921  |
| H | -3.77194 | -0.76564 | 1.01678  |
| C | -4.03147 | -2.43185 | -0.31954 |
| H | -3.53236 | -3.37975 | -0.57532 |
| H | -5.05244 | -2.66051 | 0.0165   |
| H | -4.09487 | -1.82407 | -1.2327  |
| C | -3.13455 | -2.56721 | 2.01012  |
| H | -4.12814 | -2.84074 | 2.39161  |
| H | -2.58641 | -3.49402 | 1.77975  |
| H | -2.59274 | -2.04151 | 2.80711  |

## Ti(O<sup>i</sup>Pr)<sub>4</sub> intermediate1

|                                              |              |
|----------------------------------------------|--------------|
| Zero-point correction=                       | 0.519874     |
| (Hartree/Particle)                           |              |
| Thermal correction to Energy=                | 0.549831     |
| Thermal correction to Enthalpy=              | 0.550775     |
| Thermal correction to Gibbs Free Energy=     | 0.459414     |
| Sum of electronic and zero-point Energies=   | -1158.057713 |
| Sum of electronic and thermal Energies=      | -1158.027757 |
| Sum of electronic and thermal Enthalpies=    | -1158.026813 |
| Sum of electronic and thermal Free Energies= | -1158.118173 |

|       | E (Thermal) | CV             | S              |
|-------|-------------|----------------|----------------|
|       | KCal/Mol    | Cal/Mol-Kelvin | Cal/Mol-Kelvin |
| Total | 345.024     | 112.483        | 192.284        |

|   |          |          |          |
|---|----------|----------|----------|
| C | -4.01403 | -0.38399 | 0.29333  |
| C | -2.71045 | -0.24131 | 0.7899   |
| C | -2.41872 | 0.88219  | 1.58473  |
| C | -3.39295 | 1.82925  | 1.85843  |
| C | -4.68513 | 1.69263  | 1.34867  |
| C | -4.98169 | 0.57941  | 0.57116  |
| H | -4.28169 | -1.24782 | -0.31277 |



|    |          |          |          |
|----|----------|----------|----------|
| H  | -1.40811 | 1.00195  | 1.97767  |
| H  | -3.13824 | 2.68904  | 2.47806  |
| H  | -5.4471  | 2.44002  | 1.56089  |
| H  | -5.98617 | 0.44716  | 0.17018  |
| C  | -1.98208 | -2.47018 | -0.00393 |
| H  | -1.12456 | -3.10634 | 0.25983  |
| H  | -2.85919 | -2.89127 | 0.51938  |
| C  | 0.01222  | -1.77649 | -2.58215 |
| H  | -0.50672 | -0.85846 | -2.91759 |
| H  | 0.7118   | -2.06201 | -3.38424 |
| O  | 0.75956  | -1.50964 | -1.42694 |
| C  | -1.00346 | -2.88465 | -2.37898 |
| H  | -0.48665 | -3.76578 | -1.96475 |
| H  | -1.35839 | -3.17741 | -3.37938 |
| C  | -2.21541 | -2.53383 | -1.51971 |
| H  | -2.99465 | -3.28694 | -1.71158 |
| H  | -2.63214 | -1.5725  | -1.86203 |
| Ti | 1.14392  | -0.19168 | -0.26795 |
| N  | -1.69164 | -1.14286 | 0.50862  |
| H  | -0.93569 | -1.11594 | 1.18833  |
| O  | 0.19851  | 1.29784  | -0.48029 |
| O  | 2.87189  | 0.23124  | -0.59465 |
| O  | 1.04393  | -0.73719 | 1.47795  |
| C  | 1.80822  | -1.57986 | 2.31812  |
| H  | 1.10547  | -2.03351 | 3.03988  |
| C  | 2.46698  | -2.68728 | 1.5149   |
| H  | 3.0277   | -3.36751 | 2.16932  |
| H  | 1.71624  | -3.2733  | 0.96802  |
| H  | 3.16977  | -2.2581  | 0.78416  |
| C  | 2.82282  | -0.74911 | 3.07944  |
| H  | 3.38264  | -1.36662 | 3.79404  |
| H  | 3.54019  | -0.30072 | 2.37663  |
| H  | 2.32745  | 0.06043  | 3.62902  |
| C  | 3.6417   | 1.35143  | -0.19606 |
| H  | 3.22098  | 1.75496  | 0.74696  |
| C  | 5.06769  | 0.89783  | 0.04963  |
| H  | 5.49517  | 0.49675  | -0.87978 |
| H  | 5.69196  | 1.73567  | 0.38631  |
| H  | 5.10656  | 0.10744  | 0.81064  |
| C  | 3.567    | 2.4239   | -1.26607 |
| H  | 3.97424  | 2.03956  | -2.21157 |
| H  | 2.52672  | 2.72934  | -1.43902 |
| H  | 4.14488  | 3.31063  | -0.97397 |
| C  | -0.28949 | 2.39404  | -1.22085 |

|   |          |         |          |
|---|----------|---------|----------|
| H | 0.41009  | 2.57207 | -2.0593  |
| C | -1.66017 | 2.0627  | -1.77986 |
| H | -2.37536 | 1.91153 | -0.96011 |
| H | -2.02177 | 2.87905 | -2.41895 |
| H | -1.6242  | 1.14182 | -2.3782  |
| C | -0.31714 | 3.61813 | -0.32574 |
| H | 0.67861  | 3.81763 | 0.09192  |
| H | -0.64367 | 4.50286 | -0.88757 |
| H | -1.01747 | 3.4565  | 0.50581  |

## Ti(O<sup>i</sup>Pr)<sub>4</sub> TS2

|                                              |              |
|----------------------------------------------|--------------|
| Zero-point correction=                       | 0.515105     |
| (Hartree/Particle)                           |              |
| Thermal correction to Energy=                | 0.545180     |
| Thermal correction to Enthalpy=              | 0.546124     |
| Thermal correction to Gibbs Free Energy=     | 0.453229     |
| Sum of electronic and zero-point Energies=   | -1157.973232 |
| Sum of electronic and thermal Energies=      | -1157.943158 |
| Sum of electronic and thermal Enthalpies=    | -1157.942214 |
| Sum of electronic and thermal Free Energies= | -1158.035108 |

|       | E (Thermal) | CV             | S              |
|-------|-------------|----------------|----------------|
|       | KCal/Mol    | Cal/Mol-Kelvin | Cal/Mol-Kelvin |
| Total | 342.106     | 113.037        | 195.514        |

|   |         |          |          |
|---|---------|----------|----------|
| C | 4.47133 | 0.40434  | -0.23605 |
| C | 3.25758 | -0.27919 | -0.09976 |
| C | 3.2639  | -1.68248 | -0.04687 |
| C | 4.4596  | -2.37968 | -0.111   |
| C | 5.6707  | -1.69785 | -0.23791 |
| C | 5.66572 | -0.30934 | -0.29988 |
| H | 4.49453 | 1.49187  | -0.27183 |
| H | 2.3124  | -2.20722 | 0.051    |
| H | 4.44744 | -3.46708 | -0.06012 |
| H | 6.60858 | -2.24726 | -0.28815 |
| H | 6.60393 | 0.23473  | -0.39756 |
| C | 1.89231 | 1.78399  | 0.20227  |
| H | 0.90939 | 1.93012  | 0.6729   |
| H | 2.66074 | 2.13128  | 0.91025  |
| C | 1.27778 | 0.55287  | -2.39683 |
| H | 2.30524 | 0.18985  | -2.39248 |

|    |          |          |          |
|----|----------|----------|----------|
| H  | 0.57427  | -0.01704 | -2.9904  |
| O  | -0.34754 | -0.92316 | -1.42468 |
| C  | 0.96951  | 1.9394   | -2.07344 |
| H  | -0.07337 | 1.98896  | -1.70539 |
| H  | 0.96026  | 2.46121  | -3.05183 |
| C  | 1.93782  | 2.5806   | -1.10242 |
| H  | 1.67199  | 3.62815  | -0.9123  |
| H  | 2.95287  | 2.57763  | -1.52665 |
| Ti | -1.30102 | -0.48847 | -0.11104 |
| N  | 2.01858  | 0.36334  | -0.06278 |
| H  | 1.2967   | -0.20422 | 0.39905  |
| O  | -0.1911  | -0.87616 | 1.35273  |
| O  | -2.89562 | -1.40192 | -0.11836 |
| O  | -1.54876 | 1.34915  | -0.22009 |
| C  | -3.59108 | -2.09149 | -1.12896 |
| H  | -2.86592 | -2.67654 | -1.72755 |
| C  | -4.58597 | -3.0463  | -0.4954  |
| H  | -5.31469 | -2.4828  | 0.10468  |
| H  | -5.13242 | -3.61235 | -1.26177 |
| H  | -4.07577 | -3.75781 | 0.16523  |
| C  | -4.28268 | -1.09572 | -2.0462  |
| H  | -5.03757 | -0.52648 | -1.48326 |
| H  | -3.55654 | -0.38236 | -2.46208 |
| H  | -4.78618 | -1.6036  | -2.88013 |
| C  | -0.26452 | -0.78198 | 2.75085  |
| H  | -0.2102  | -1.80639 | 3.16566  |
| C  | 0.928    | 0.00774  | 3.26443  |
| H  | 0.9479   | 0.03753  | 4.36193  |
| H  | 1.86991  | -0.43477 | 2.91182  |
| H  | 0.87397  | 1.04381  | 2.89421  |
| C  | -1.57155 | -0.15215 | 3.20129  |
| H  | -1.62985 | 0.88795  | 2.8447   |
| H  | -2.43575 | -0.7012  | 2.80155  |
| H  | -1.65268 | -0.13967 | 4.29673  |
| C  | -2.46948 | 2.39949  | -0.14085 |
| H  | -2.7909  | 2.6584   | -1.17027 |
| C  | -3.70132 | 1.99989  | 0.6525   |
| H  | -4.16808 | 1.10728  | 0.21574  |
| H  | -3.42334 | 1.76242  | 1.6901   |
| H  | -4.44069 | 2.81201  | 0.67261  |
| C  | -1.78288 | 3.61285  | 0.46442  |
| H  | -0.89607 | 3.88991  | -0.12282 |
| H  | -2.45572 | 4.48009  | 0.50056  |
| H  | -1.45648 | 3.38327  | 1.49023  |
